# Supplementary material for: Women’s leadership in academic medicine: a systematic review of extent, condition and interventions
Source: PubMed Central journal article supplement — BMJ Open. 2020 Jan 15;10(1):e032232. doi: 10.1136/bmjopen-2019-032232 (PMC7044906; doi:10.1136/bmjopen-2019-032232), 2020-01-15
Supplement: bmjopen-2019-032232.draft_revisions.pdf [file bmjopen-2019-032232.draft_revisions.pdf]

# BMJ Open

BMJ Open is committed to open peer review. As part of this commitment we make the peer review history of every article we publish publicly available.

When an article is published we post the peer reviewers' comments and the authors' responses online. We also post the versions of the paper that were used during peer review. These are the versions that the peer review comments apply to.

The versions of the paper that follow are the versions that were submitted during the peer review process. They are not the versions of record or the final published versions. They should not be cited or distributed as the published version of this manuscript.

BMJ Open is an open access journal and the full, final, typeset and author-corrected version of record of the manuscript is available on our site with no access controls, subscription charges or pay-per-view fees (<http://bmjopen.bmj.com>).

If you have any questions on BMJ Open's open peer review process please email [editorial.bmjopen@bmj.com](mailto:editorial.bmjopen@bmj.com)

# BMJ Open

## Women's leadership in academic medicine: A systematic review of extent, condition, and interventions.

|                               |                                                                                                    |
|-------------------------------|----------------------------------------------------------------------------------------------------|
| Journal:                      | <i>BMJ Open</i>                                                                                    |
| Manuscript ID                 | bmjopen-2019-032232                                                                                |
| Article Type:                 | Research                                                                                           |
| Date Submitted by the Author: | 12-Jun-2019                                                                                        |
| Complete List of Authors:     | Alwazzan, Lulu; Imam Muhammad Ibn Saud Islamic University, Al-Angari, Samiah; King Saud University |
| Keywords:                     | women, leadership, academic medicine, MEDICAL EDUCATION & TRAINING, faculty development            |
|                               |                                                                                                    |

SCHOLARONE™  
Manuscripts

1  
2  
3  
4  
5  
6  
7  
8 **Women's leadership in academic medicine: A systematic review of extent, condition, and**  
9 **interventions.**  
10  
11  
12  
13

14 Lulu Alwazzan<sup>1</sup> and Samiah S. Al-Angari<sup>2</sup>

15  
16  
17 <sup>1</sup>Department of Medical Education, College of Medicine, Imam Muhammad Ibn Saud Islamic  
18 University, Riyadh, Saudi Arabia

19  
20  
21 ORCID ID: <https://orcid.org/0000-0002-8403-8588>  
22

23  
24 <sup>2</sup>Department of Otolaryngology- Head & Neck Surgery, College of Medicine, King Saud  
25 University, Riyadh, Saudi Arabia

26  
27  
28 ORCID ID: <https://orcid.org/0000-0002-8950-0524>  
29

30  
31 \*Correspondence to: Lulu Alwazzan, Department of Medical Education, College of Medicine,  
32 Imam Muhammad Ibn Saud Islamic University, 7544 - Othman Bin Affan Rd, Al-Nada 13317-  
33 4233, Riyadh, Kingdom of Saudi Arabia; Email: [laalwazzan@imamu.edu.sa](mailto:laalwazzan@imamu.edu.sa); Tel:  
34  
35  
36  
37 +966112037111.  
38  
39  
40  
41

42 **Word count:** 4145  
43  
44  
45  
46

47 **Keywords:** Women, leadership, academic medicine, medical education, career progression,  
48  
49 faculty development.  
50  
51  
52  
53  
54  
55  
56  
57  
58  
59  
60

## Abstract

### Objective

Because culture reflects leadership, the making of diverse and inclusive medical schools begins with diversity amongst leaders. Particularly, the inclusion of women leaders remains elusive, warranting a systematic exploration of scholarship in this area. We specifically ask: 1) What is the extent of women's leadership in academic medicine? 2) What factors influence women's leadership? 3) What is the impact of leadership development programs on women's individual careers and on medical schools' environments?

### Method

Searches were conducted through Ovid MEDLINE, EMBASE, CINAHL, PsycINFO, the Cochrane Library, and ERIC databases from the earliest date to April 2018. All English quantitative studies exploring women's attainment of leadership positions, investigating perceptions of women's leadership amongst faculty members, and documenting leadership development programs were identified.

### Results

The search resulted in 4024 citations. Review of the abstracts led to the retrieval of 93 full-text articles. Thirty-four studies reported in 36 articles were included in the review. Twenty were cross-sectional studies including 1 case report, 9 cohort, 5 pre/post interventions; 25 (74%) were conducted in more than 3 institutes, and 9 (26%) were conducted at only 1 institute. Of the included studies, 18 (53%) utilized questionnaires with response rates ranging from 34% to 100%, with many not validated properly. Fewer than 50% of women took on leadership positions. Women's leadership was hindered by a mangle of implicit barriers. Leadership

1  
2  
3 development programs were reported to have an important influence on women's individual  
4  
5 professional success and on medical schools' environments.  
6

### 7 **Conclusion**

8  
9  
10 Scholarship on women's leadership inadvertently produced institute-centric rather than women-  
11  
12 centric research. More robust contextualized scholarship is needed to provide practical-  
13  
14 recommendations; drawing on existing conceptual frameworks and utilizing more rigorous  
15  
16 research methods.  
17  
18  
19  
20  
21  
22  
23  
24  
25  
26  
27  
28  
29  
30  
31  
32  
33  
34  
35  
36  
37  
38  
39  
40  
41  
42  
43  
44  
45  
46  
47  
48  
49  
50  
51  
52  
53  
54  
55  
56  
57  
58  
59  
60

### Strengths and limitations of this study

- Unlike other reviews addressing women's careers in academic medicine, this review focuses solely on studies exploring the leadership of women, a central component of gender equity initiatives.
- The systematic approach provided a rigorous framework by which study objectives were set and studies were identified and appraised.
- Exclusion of qualitative literature may limit the conceptual argument of this study.
- Reviewed studies are Western, therefore, findings of this review are not generalizable to non-Western contexts.

## Introduction

Inclusivity and diversity are goals every medical school hopes to achieve for its learners and faculty members.<sup>1-3</sup> An impediment to realizing these goals is the culture of academic medicine, commonly criticized for reinforcing gender and ethnic inequalities.<sup>4-8</sup> By bringing a transformative perspective, women leaders are often thought of as catalysts of organizational culture change, capable of creating better career experiences for the diverse workforce that has come to makeup medical education and practice.<sup>9-11</sup> Despite the recognition, it has been challenging for scholars to study and develop women's leadership. The difficulty, in part, stems from the remaining barriers' cultural nature: traditional models of work,<sup>11</sup> implicit gender bias,<sup>12</sup> limited access to support systems both mentors<sup>9</sup> and sponsors<sup>13</sup>, gender stereotyping,<sup>14</sup> gendered views of leadership,<sup>15</sup> and culture-abiding self-imposed constraints.<sup>16 17</sup>

Such barriers are, of course, not unique to women leaders or to the context of academic medicine. The wealth of literature exploring women's careers, much of it reviewed in 2 systematic reviews,<sup>12 18</sup> 1 narrative review,<sup>19</sup> and 2 overviews<sup>6 20</sup> conclude that broadly, women faculty face the very same hurdles as they join<sup>12</sup> and progress in academic medicine in their roles as physicians<sup>20</sup>, teachers,<sup>18</sup> and researchers.<sup>19</sup> Often, these barriers become reason enough for women to leave academia.<sup>21</sup> Although these reviews, and the studies within them, broaden our understanding of women's experiences, they have treated women's leadership as ancillary to a bigger discourse on career progression, often coming to leadership as one solution to gender inequity. By doing so, these reviews ignore the centrality of leadership in shaping culture and the change needed to realize gender equity. The current systematic review, therefore, aims to address this gap in the research by exclusively reviewing literature on women's leadership in academic medicine.

## Background

In the quest to provide patient-centered care, safe learning environments for trainees, and engaging work environments for faculty, the culture of medical education and practice became an area of much scrutiny.<sup>5 21-24</sup> Hostility, disrespect, abuse, and discrimination are widely documented (e.g. US<sup>21 25-28</sup>, Canada,<sup>29-31</sup>, UK<sup>32-34</sup>) as normalized behaviors. The National Initiative on Gender, Culture, and Leadership in Medicine: C-Change has benchmarked the culture of academic medicine from the perspective of faculty and with special regard to gender equity, both in the US and internationally.<sup>35</sup> As the fulcrum of several studies,<sup>4 5 21 23 24 36-41</sup> C-Change links unhealthy behaviors to culture, and summates that for culture to change, underpinning values need to change first.

But how do values change? According to the organizational literature, cultural values are the values of founding leaders, are adopted by subsequent leaders and members of the culture, and are kept firmly in place by policies and procedures that were developed and implemented over time.<sup>42 43</sup> Although the dynamic interplay between these forces is important, we draw attention to the locus, cultural values are ultimately the values of leaders. In his 2007 speech "Culture and the courage to change"<sup>44</sup>, the American Association of Medical Colleges president Kirch spoke to this very point "...This new culture also requires a different kind of leader...search committees will need to look far beyond the weight of a candidate's curriculum vitae, considering factors such as their ability to build alignments, foster trust, and make adaptive changes".

Against the backdrop of need for culture change and a leadership to see it through, we take up women's leadership in academic medicine, often viewed as both savior and victim of culture.<sup>8 22</sup> Such a portrayal illustrates the inevitable role women must play as leaders, especially given their



1  
2  
3 increased numbers,<sup>10</sup> but it also indicates conceptual immaturity. From the emerging conceptual  
4  
5 discourse,<sup>10 17 45-47</sup> we know that scholarship on women's leadership lacks depth, where  
6  
7 leadership emergence is commonly restricted to the pipeline metaphor, while enactment of it  
8  
9 remains grounded in the generic leadership literature.  
10  
11  
12  
13

### 14 *Leadership emergence*

15  
16 How women emerge as leaders is often conceptualized using the pipeline metaphor. The  
17  
18 metaphor suggests that increasing the number of women in male-dominated fields will  
19  
20 eventually lead to an increase in the number of women leaders. According to Magrane and  
21  
22 Morahan<sup>10</sup> the metaphor misses pertinent organizational nuances, namely the implicit gender  
23  
24 bias women face. For example, while men have many role models and a robust support system,  
25  
26 women do not. The metaphor falsely assumes the presence of role models at the end of the  
27  
28 pipeline willing to help women transition to leadership. Given the conceptual limitation, the  
29  
30 authors propose frameworks that recognize the complex organizational systems women must  
31  
32 navigate to emerge as leaders: the leadership continuum<sup>47</sup>, and systems of career influences.<sup>45</sup>  
33  
34  
35  
36  
37  
38

### 39 *Leadership enactment*

40  
41 Much of women's leadership studies remain grounded in the broader leadership literature.<sup>17</sup> As a  
42  
43 result, our conceptualizations of leadership enactment draw on theories developed upon the study  
44  
45 of male leaders, making such scholarship inherently male. For example, the older 'great man'  
46  
47 theory exclude women entirely, associating leadership with agentic qualities e.g. authoritative  
48  
49 and assertive, qualities that women supposedly do not possess. Newer collaborative theories e.g.  
50  
51 participatory, distributed, and transformational leadership seem accommodating for women  
52  
53 leaders because of their emphasis on social accountability and collaborative work, however, they  
54  
55  
56  
57  
58  
59  
60

1  
2  
3 risk trapping women in gender stereotypes, e.g. nurturing, that nominate women for less  
4  
5 prestigious leadership positions e.g. course coordinator.  
6  
7  
8  
9

10 It is with the wider need for culture change in academic medicine and the more focused need for  
11 conceptual understanding of women's leadership studies in mind that we systematically  
12 reviewed studies on women's leadership in academic medicine. It is our aim to first synthesize  
13  
14 reviewed studies on women's leadership in academic medicine. It is our aim to first synthesize  
15 work done in this area. We ask: 1) What is the extent of women's leadership? 2) What factors  
16 influence women's leadership? 3) What is the impact of leadership development programs on  
17 women's individual careers and on medical schools' environments? Second, we aim to present  
18 an analysis of such works, we concern ourselves, not only with what was done thus far, but how  
19 produced knowledge helps or hinders women's leadership.  
20  
21  
22  
23  
24  
25  
26  
27  
28  
29

## 30 **Methods**

### 31 *Search strategy*

32 In April 2018, the first author conducted a search using the following databases: (1) Ovid  
33 MEDLINE; (2) EMBASE; (3) CINAHL; (4) Ovid PsycINFO; (5) all EBM Reviews on Ovid-  
34 ACP Journal Club, Cochrane Database of Systematic Reviews, Database of Abstracts of  
35 Reviews of Effects, and Cochrane Central Register of Controlled Trials (1st quarter); and (6)  
36 ERIC. Searches were restricted to English, using a combination of key terms including  
37 "women", "leadership", and "academic medicine" (supplementary material 1). Following the  
38 PRISMA protocol,<sup>48</sup> she then screened the compiled results, excluding irrelevant articles, and  
39 inductively developing a preliminary thematic framework (Figure 1). The second list of article  
40 titles/abstracts and thematic framework were independently reviewed by both authors. The two  
41 authors discussed their findings and differences were reconciled. The full texts of nominated  
42  
43  
44  
45  
46  
47  
48  
49  
50  
51  
52  
53  
54  
55  
56  
57  
58  
59  
60

1  
2  
3 articles were then retrieved for further assessment. At this stage, the bibliographies of nominated  
4  
5 articles were reviewed for potential relevant studies. Experts in the field were identified from  
6  
7 those works and contacted for published studies not revealed through the database search. We  
8  
9 wanted to gain an idea of this area's historical trend, therefore we did not restrict our search to  
10  
11 particular dates. Supplementary material 2 is a checklist used to ensure PRISMA guidelines were  
12  
13 followed.  
14  
15

### 16 17 18 19 *Study selection and data extraction*

20  
21 We identified all studies evaluating the extent of women's leadership in academic medicine at a  
22  
23 departmental, college, and medical graduate program level. Although we recognize the  
24  
25 interconnection, we excluded studies that explored women's leadership in professional societies,  
26  
27 journal editorial boards, and journal editorships, focusing our examination solely on leadership  
28  
29 within medical schools and graduate residency programs. Moreover, we identified studies  
30  
31 evaluating the hindering and facilitating factors to women's leadership as perceived by women  
32  
33 and men faculty members and leaders. Finally, we identified studies that document leadership  
34  
35 interventions and their efficacy as reported by women participants of such programs and their  
36  
37 home medical schools.  
38  
39  
40  
41  
42  
43

44 We included quantitative study designs and excluded qualitative designs, aiming to report on the  
45  
46 latter elsewhere. We included a case study because it presented quantitative descriptive  
47  
48 information on women in leadership across non-Western multinational settings. Studies were  
49  
50 heterogeneous in their objectives, approaches, and target populations, it was therefore not  
51  
52 possible to pool data and come to a meaningful statistical finding. An excel spreadsheet  
53  
54 (included the following details: author, title, year, publication, study purpose, population,  
55  
56  
57  
58  
59

1  
2  
3 response rate, strengths, and weaknesses) was used to collate extracted data. We draw on a  
4 strategy suggested by the Best Evidence Medical Education Collaboration,<sup>49 50</sup> to provide a  
5 narrative of the results. Moreover, using the Medical Education Research Quality Study  
6 Instrument (MERSQI),<sup>51</sup> we give a score and comment on the strength of individual studies,  
7 assessing their quality in terms of study design, sampling strategy, type of data, instrument  
8 validation, data analysis and outcome measures. The 10 item MERSQI tool was designed to  
9 evaluate quantitative medical education studies, giving a total possible score of 5 to 18.  
10 Furthermore, we point out specific methodological issues not covered by the MERSQI  
11 assessment.  
12  
13  
14  
15  
16  
17  
18  
19  
20  
21  
22  
23  
24  
25

### 26 *Patient and public involvement*

27 Patients were not directly involved in this systematic review.  
28  
29  
30  
31

## 32 **Results**

### 33 *Overview*

34 The initial database search revealed 4024 citations. Review of the titles and abstracts led to the  
35 retrieval of 93 full-text articles for further assessment. Thirty six articles met the inclusion  
36 criteria and were included in this review (Figure 1), 3 of which were identified through the  
37 bibliography search.<sup>52-54</sup> No studies beyond those identified were revealed by the 17 contacted  
38 scholars. Original data were available for 34 studies, described in 36 articles.<sup>5 15 52-85</sup> The  
39 agreement between raters was very good ( $\kappa = 0.93$ ), where there was disagreement, the authors  
40 resolved their differences by discussion. See supplementary material 3 for an overview of  
41 included studies.  
42  
43  
44  
45  
46  
47  
48  
49  
50  
51  
52  
53  
54  
55  
56  
57  
58  
59  
60

1  
2  
3 The majority of studies (n=30) were conducted in the United States, 3 included Canadian  
4 respondents<sup>60 73</sup> or information on Canadian schools' leadership,<sup>55</sup> 1 study was conducted across  
5  
6 3 countries (UAE, Qatar, and Singapore),<sup>81</sup> 1 study was conducted across 4 European countries  
7  
8 (Germany, Sweden, Austria, and the UK),<sup>68</sup> 1 study in Norway,<sup>69</sup> and 1 study in Croatia.<sup>75</sup> The  
9  
10 earliest study was conducted in 1999,<sup>69</sup> and more than 50% of the studies were published in the  
11  
12 past 5 years alone. The design of 9 (26%) studies was retrospective cohort,<sup>15 55 56 67 73 75-77 82</sup> 1  
13  
14 (3%) prospective cohort,<sup>58</sup> and 5 (15%) were pre/post interventions.<sup>61 64 70 72 80</sup> Ten studies were  
15  
16 cross-sectional self-reported questionnaires.<sup>5 60 62 63 66 78 79 81 83 85</sup> Where questionnaires were used,  
17  
18 the response rates ranged from 34 to 100%. Nine studies were cross-sectional surveys of publicly  
19  
20 available or archives of data,<sup>54 57 59 65 67 69 71 74 84</sup> and 1 study was a case report.<sup>68</sup>  
21  
22  
23  
24  
25  
26  
27  
28

29 Seventeen articles were published by medical education journals, 10 were published by medical  
30  
31 specialty journals (Internal Medicine = 3, Hospital Medicine =1, Ophthalmology =1,  
32  
33 Obstetrics/Gynecology = 2, Urology = 2, Surgery = 1), 5 articles were published by The  
34  
35 Women's Health Journal, 2 by general medicine journals (British Medical Journal = 1, and the  
36  
37 Human Resource for Health Journal = 1).  
38  
39  
40  
41

42 Many of the studies have methodological limitations. Eleven studies used websites and publicly  
43  
44 available data which may be outdated or inaccurate.<sup>15 54-56 59 62 65 67 74 81 84</sup> Six studies did not  
45  
46 reveal how their questionnaires were developed or if they were tested,<sup>62 64 78 79 83 85</sup> compromising  
47  
48 the validity of the findings. Many of the questionnaires were self-reported with modest response  
49  
50 rates. The pre/post intervention studies had small number of participants due to the small number  
51  
52  
53  
54  
55  
56  
57  
58  
59  
60

1  
2  
3 of participants of leadership development programs. Moreover, nearly all pre/post studies did not  
4  
5 present longitudinal findings on the effectiveness of their interventions.  
6  
7

8  
9  
10 Only 6 studies provided contextual demographic (ethnicity or age) and career (career-stage, other  
11  
12 leadership appointments, or leadership training) data on the studied populations.<sup>5 55 59 61 64 80</sup> The  
13  
14 MERSQI scores of all studies ranged from 7 to 12.5 (supplementary material 3 and 4). In what  
15  
16 follows, we present our findings grouped according to our 3 themes: the extent of women's  
17  
18 leadership, the factors influencing women's leadership, and the impact of leadership programs on  
19  
20 women's individual careers and on medical schools' environments.  
21  
22  
23

### 24 25 26 *Extent of women's leadership*

27  
28 Twenty studies reported the extent of women's leadership in academic medicine by comparing  
29  
30 the number of women attaining leadership positions to the number of men.<sup>54-59 62 65 67 69 71 74-79 81 84</sup>  
31  
32 <sup>85</sup> The studies however, differed in their approach and which organizational positions they chose  
33  
34 to highlight (Table 1). Three studies merely described the representation of women in specialty  
35  
36 leadership positions,<sup>57 65</sup> or within a medical school.<sup>75</sup> One study determined if the proportion of  
37  
38 leadership positions in Obstetrics and Gynecology held by women is consistent with the  
39  
40 proportion of women entering residency.<sup>55</sup> Six studies compared the composition of chairs  
41  
42 and/or program directors' gender to faculty members of medical schools,<sup>59 74 77-79 84</sup> 5 studies  
43  
44 compared composition of residency program directors to medical residents composition,<sup>67 71 78 79</sup>  
45  
46 <sup>84</sup> while 2 studies compared the proportion of residents to department chairs.<sup>78 79</sup> Two studies  
47  
48 compared the number of women in leadership positions in one medical specialty to other  
49  
50 specialties.<sup>56 67</sup>  
51  
52  
53  
54  
55  
56  
57  
58  
59  
60

1  
2  
3 At the Department of Medicine at Johns Hopkins, Monroe et al.,<sup>74</sup> examined the number of  
4 women leaders and their academic ranks. The authors found that women assistant professors  
5 were more likely to hold leadership positions than male assistant professors ( $p = 0.03$ ), while  
6 women and men at the associate professor and professor level were equally as likely to take on  
7 leadership positions. In contrast, Reed et al.,<sup>76</sup> reported in their longitudinal cohort study that  
8 fewer women than men took on leadership positions at Mayo Clinic, arguing that leadership  
9 appointments are based on scholarly production at mid-career, and that women had higher  
10 research production only later in their careers. A national longitudinal study of US faculty,  
11 reported after adjusting for scholarly production that women were less likely to become leaders  
12 (OR = 0.49; 95% CI, 0.35 - 0.69).<sup>58</sup>

13  
14  
15  
16  
17  
18  
19  
20  
21  
22  
23  
24  
25  
26  
27  
28 As part of a larger study on gender inequity in a Pediatrics department, Rotbart et al.,<sup>77</sup> reported  
29 the number of women in leadership positions and the time they served in those positions. The  
30 authors found women faculty to be less likely to reach leadership positions, and this lag was due  
31 to the lag in academic promotion.

### 32 33 34 35 36 37 38 39 40 *Factors influencing women's leadership*

41 Fifteen articles examined factors associated with leadership gender disparities,<sup>5 15 58 60 62 64 66 69 70</sup>  
42  
43  
44 <sup>72 73 76 77 80 82</sup> revealing that hostile organizational culture, explicit and implicit gender biases,  
45 stereotyping, research productivity, lack of mentorship, timing of academic appointments, and  
46 educational backgrounds negatively influenced women's attainment of leadership positions  
47  
48  
49 (Table 2).  
50  
51  
52  
53  
54  
55  
56  
57  
58  
59  
60

1  
2  
3 In the United States, 3 studies explored women's leadership through the perceptions of medical  
4 schools deans,<sup>60</sup> faculty within Psychiatry departments,<sup>62</sup> and faculty at 1 private medical  
5 college.<sup>5</sup> Organizational culture was viewed as hindering to women's leadership. For example,  
6 Pololi and colleagues<sup>5</sup> reported that women faculty, in comparison to men, were less likely to  
7 perceive their institutions as family-friendly ( $T = -4.06, p < 0.001$ ), making efforts towards  
8 addressing gender diversity ( $T = -9.70, p < 0.001$ ), and that their personal values were less  
9 congruent with institutional values ( $T = -2.06, p < 0.05$ ).

10  
11  
12  
13  
14  
15  
16  
17  
18  
19  
20  
21 Two studies, investigated research productivity and its impact on women's leadership.<sup>58 76</sup>  
22 Women were almost half as likely as men (OR, 0.49; 95% CI, 0.35–0.69) to hold leadership  
23 positions despite the number of research publications.<sup>58</sup> Four studies addressed stereotyping and  
24 its effects on women's leadership.<sup>15 62 64 69</sup> Sexism was reported as a significant barrier to women  
25 faculty as they progressed in their careers in Psychiatry departments ( $p = 0.0001$ ).<sup>62</sup>

26  
27  
28  
29  
30  
31  
32  
33  
34  
35 In a pre/post intervention, Girod et al.<sup>64</sup> investigated the association between implicit gender  
36 biases and leadership positions. The authors found that gender and age were significantly in  
37 favor of men ( $\beta$  male = 0.18,  $p = 0.001$ ;  $\beta$  age = 0.04,  $p = 0.004$ ), suggesting that being an older  
38 male faculty is inherently associated with leadership than with other age and gender  
39 combinations. Gender bias was also documented in the language of tenure policies of medical  
40 schools.<sup>15</sup> Medical schools with the word "leader" in their tenure criteria were 6 times more  
41 likely to have a lower percentage of women tenured faculty than schools without the word  
42 "leader" (OR, 6.0; 95% CI, 1.02, 35.37;  $p = 0.04$ ). Little or lack of mentorship was documented  
43 as a hindering factor to women seeking leadership.<sup>62</sup>

44  
45  
46  
47  
48  
49  
50  
51  
52  
53  
54  
55  
56  
57  
58  
59  
60



1  
2  
3  
4  
5  
6 White et al.<sup>82</sup> observed notable differences among women and men medical school deans in the  
7  
8 type of advanced degrees (Doctorate in male deans vs. business-related degrees in female deans)  
9  
10 and the rank of the deans' medical school education and training (more men graduating from the  
11  
12 top 50 NIH-ranked schools than women), presenting what seems like a probable association. An  
13  
14 important facilitating factor to women leaders was leadership programs.<sup>60 61 64 66 70 72 73 80</sup> which  
15  
16 we discuss in more depth in the next section.  
17  
18  
19  
20  
21

### 22 *The impact of women's leadership programs*

23 Six studies document the impact of women's leadership interventions on individual career  
24  
25 satisfaction<sup>61 66 70 72 80</sup> and on medical schools' environments.<sup>60</sup> A positive effect of leadership  
26  
27 development programs was observed on a myriad of leadership skills for women academicians  
28  
29 (Table 3). Programs improved women's negotiation skills<sup>66 70 72</sup> and provided networking  
30  
31 opportunities.<sup>66 70 72 80</sup> Alumnae of leadership programs were more likely to attain leadership  
32  
33 positions,<sup>61 80</sup> they were more likely to have knowledge and confidence in leadership skills, and  
34  
35 were more likely to have knowledge of organizational structures and processes.<sup>61</sup> Most studies  
36  
37 employed a pre/post design to evaluate leadership programs, while one study evaluated  
38  
39 leadership programs through the perceptions of medical school deans. In their survey of US and  
40  
41 Canadian medical school leadership, Dannels et al.<sup>60</sup> investigated the influence of the Executive  
42  
43 Leadership in Academic Medicine (ELAM) program on organizational climate. The authors  
44  
45 report that deans had positive perceptions (M = 5.62, SD = 0.961) of the ELAM program and the  
46  
47 influence brought to medical schools by its alumnae.<sup>60</sup> The authors also found a significant  
48  
49 difference between men and women deans in how they developed leadership in faculty, with  
50  
51 women deans reporting more frequent use of practices than did men ( $p = 0.032$ ). These practices  
52  
53  
54  
55  
56  
57  
58  
59  
60

1  
2  
3 included publicly supporting the person when she/he makes a difficult decision, appointing a  
4  
5 faculty member to high-level committees or task forces, and nominating faculty to leadership  
6  
7 training outside the institution.  
8  
9

## 10 11 12 **Discussion**

13  
14 To our knowledge, this systematic review is the first that synthesizes evidence on women's  
15  
16 leadership in academic medicine. The 34 studies address 3 themes: the extent of women's  
17  
18 leadership, factors influencing their leadership, and the impact of leadership development  
19  
20 programs on women's individual professional success and medical schools' environments.  
21  
22 Deeper analysis revealed that included studies are levered by imperceptible underpinnings.  
23  
24 Oriented by a positivist paradigm, it seems much of the reviewed literature inadvertently  
25  
26 embraced a narrow understanding of leadership, creating institute-centric rather than women-  
27  
28 centric scholarship. In what follows, we unsettle the conceptual foundation of the reviewed  
29  
30 studies. We argue that women's leadership studies provide a mere diversity/inclusion  
31  
32 performance indicator for institutes that does not necessarily serve women. We then argue the  
33  
34 need to shift to a more nuanced women-centric understanding of leadership.  
35  
36  
37  
38  
39  
40  
41

### 42 *Leadership as organizational position*

43  
44 Our review revealed that in medical schools, women had less access to leadership positions, the  
45  
46 evidence showed fewer than 50% of leadership positions –chairs, program directors, or unit  
47  
48 heads- were occupied by women faculty members (Table 1). Rooted in understanding leadership  
49  
50 as occupancy of an organizational position, in what Northouse<sup>43</sup> calls *assigned leadership*, nearly  
51  
52 60% of the studies' main objective was to document the gender distribution of leadership  
53  
54 positions. This conceptualization is based upon a positivist understanding of leadership, which  
55  
56  
57  
58  
59  
60

1  
2  
3 ultimately sees leadership as a quantifiable variable. The rationale for this approach may be that  
4  
5 determining gender ratio in leadership will establish a performance indicator for the institute in  
6  
7 terms of inclusion and diversity i.e. the number of women in leadership reflects gender  
8  
9 equity/inequity. We question the benefit of this reduction to the women leaders. Although, we do  
10  
11 not think the two are in conflict, we believe institute-centric thinking neglects the value women  
12  
13 leaders bring to leadership and the organizational complexities they must navigate to become  
14  
15 leaders. Leadership is not merely an organizational position for women faculty to occupy.  
16  
17 Moreover, the number of women occupying leadership positions at a given point in time, an idea  
18  
19 perpetuated by the pipeline metaphor,<sup>10</sup> does not by itself reflect equity in leadership. Indeed, the  
20  
21 goal is not a critical mass of women who are assigned leaders but “a critical mass of women with  
22  
23 sustained success as leaders”<sup>47</sup>  
24  
25  
26  
27  
28  
29  
30

### 31 *Leadership as process of influence*

32 Recognizing the limitation of a positivist paradigm, we suggest a women-centric approach. This  
33  
34 understanding aligns with organizational traditions, where leadership is conceptualized as a  
35  
36 process of influence between leader and followers;<sup>43 86 87</sup> that is a series of actions and exchanges  
37  
38 take place at the interpersonal level for leadership to occur. Here scholars recognize the  
39  
40 importance of a leader's capacity for influence and how such influence shapes culture.<sup>42 43 88</sup>  
41  
42  
43  
44  
45

46 First, to explore capacity for influence, we put women at the heart of inquiry: What are women's  
47  
48 leadership capacities, that is their motivations, knowledge, skills, and experiences? Many studies  
49  
50 did not mention whether women leaders self-nominated or were assigned to their leadership  
51  
52 positions, how long they held those positions, if they had dual leadership appointments, or  
53  
54  
55  
56  
57  
58  
59  
60

1  
2  
3 whether women had formal leadership training. Many studies assumed prior leadership  
4  
5 knowledge amongst their respondents and none examined the role of mentors or sponsors.  
6  
7

8  
9  
10 Addressing these gaps is vital to our understanding of leadership emergence and how gender bias  
11  
12 manifests. Drawing on more mature conceptual work, systems of career influence,<sup>45</sup> we suggest  
13  
14 more robust correlational and causal study designs. For example, beyond documenting lack of  
15  
16 mentorship,<sup>62</sup> a correlational study can investigate the relationship between  
17  
18 mentorship/sponsorship and how long women hold leadership positions. A causal study can  
19  
20 investigate the effect of hands on leadership experience e.g. dual-leadership appointments on  
21  
22 women's decision-making abilities. Hands-on experience may afford women a wider perspective  
23  
24 of organizational processes, as a result, better decision-making abilities.  
25  
26  
27

28  
29  
30  
31 Second, social interactions are the essence of leadership and in time produce culture; the *values*  
32  
33 and *beliefs* that govern our behaviors in organizations.<sup>42</sup> From our review, the current culture,  
34  
35 underpinned by biased values and stereotypical beliefs, is identified as a hindering factor to  
36  
37 women's leadership. This culture may sometimes feel static and unchanging, but it is actually  
38  
39 recreated and reinforced in the daily interactions. In the proposed conceptualization, we come to  
40  
41 recognize that culture and leadership are two sides of the same coin,<sup>441</sup> understanding one  
42  
43 requires exploring the other.  
44  
45  
46

47  
48  
49 Once more we put women at the heart of inquiry: How do women leaders shape culture? From  
50  
51 our review, many studies neglected women's *enactment* of leadership. Many studies did not  
52  
53 mention whether women had informal leadership roles, in what Northouse<sup>43</sup> calls *emergent*  
54  
55  
56  
57  
58

1  
2  
3 *leadership*, referring to leadership that develops organically and is based on building alignments  
4 and fostering trust. Many studies did not mention what values informed women's decisions, what  
5 behaviors they modelled, or what actions they took to improve the quality of medical education  
6 and practice whether formally or informally. No studies explored the leadership styles women  
7 embraced. Addressing these gaps situates women leaders as critical actors in culture change.<sup>22 45</sup>  
8  
9  
10  
11  
12  
13  
14  
15 <sup>47</sup> and begins to conceptually ground women's enactment of leadership in their lived experiences,  
16 rather than the broader generic leadership literature.<sup>17</sup>  
17  
18  
19  
20

21 The catalyst effect of leadership development programs on women's careers is encouraging.  
22 Such programs may be an ideal place to explore women's enactment of leadership. For example,  
23 women who join such programs are likely motivated by a desire to transition from informal  
24 leadership to formal leadership positions. A comparative case study design can explore the  
25 contextual transition for alumnae. A mixed-method design can interview women alumnae on the  
26 values that inform their actions as leaders. Based on qualitative findings, a wide-scale survey can  
27 be developed and used to map out women's leadership approaches and styles.  
28  
29  
30  
31  
32  
33  
34  
35  
36  
37  
38  
39

#### 40 *Study limitations*

41 Our study has some limitations. First, we restricted the review to quantitative literature and  
42 argued for studying contextual organizational nuances, which might have been explored in  
43 qualitative studies. Second, we defined leadership as a process of influence between leaders and  
44 followers but have limited our discussion to the leader's perspective. Third, we found that all  
45 studies except one<sup>81</sup> were conducted in North America and Europe. As a result, the presented  
46 evidence may not reflect non-Western contexts, but we have forgone discussion of this finding.  
47  
48  
49  
50  
51  
52  
53  
54  
55  
56  
57  
58  
59  
60

1  
2  
3 Addressing these limitations requires more space and further research which we hope to embark  
4  
5 on and invite others to do so.  
6  
7  
8  
9

## 10 **Conclusion**

11 After reviewing the quantitative literature on women's leadership, we recognize the need for  
12  
13 broader conceptual foundations. We also recognize that in problematizing the current conceptual  
14  
15 foundation, we join other scholars<sup>5 17 22 47 53</sup> in arguing for more innovative research questions  
16  
17 and rigorous methods. Our argument for broadening the conceptual foundation is two-fold. First,  
18  
19 by focusing on women's experiences, we can offer readership of this field, who we assume are  
20  
21 largely women faculty, practical knowledge that can help them pursue their own leadership.  
22  
23 Second, leadership and culture are inextricably linked.<sup>47</sup> Consequently, the culture change we  
24  
25 aspire to in academic medicine cannot happen without a deeper understanding of this  
26  
27 relationship.  
28  
29  
30  
31  
32  
33  
34  
35  
36  
37  
38  
39  
40  
41  
42  
43  
44  
45  
46  
47  
48  
49  
50  
51  
52  
53  
54  
55  
56  
57  
58  
59  
60

1  
2  
3 **Contributors:** Lulu is responsible for the study's conception, design, and conceptual argument.  
4  
5 She and Samiah collected, analyzed, interpreted, and discussed the data. Both Lulu and Samiah  
6  
7 wrote the manuscript.  
8  
9

10 **Funding/Support:** This research received no specific grant from any funding agency in the  
11  
12 public, commercial or not-for-profit sectors.  
13

14 **Competing interests:** None declared.  
15

16 **Patient consent for publication:** Not required.  
17

18 **Other disclosures:** None  
19  
20

21 **Ethical approval:** Not applicable  
22

23 **Data sharing statement:** The data from the current study may be requested from the  
24  
25 corresponding author.  
26  
27  
28  
29  
30  
31  
32  
33  
34  
35  
36  
37  
38  
39  
40  
41  
42  
43  
44  
45  
46  
47  
48  
49  
50  
51  
52  
53  
54  
55  
56  
57  
58  
59  
60

## References

1. AAMC. Diversity in Medical Education.  
<https://www.aamcdiversityfactsandfigures2016.org>. Published 2016. Accessed June 13, 2018.
2. Dogra N. The development and evaluation of a programme to teach cultural diversity to medical undergraduate students. *Med Educ* 2001;**35**:232-41.
3. Tsouroufli M, Malcolm I. Equality, diversity and fairness in medical education: international perspectives. *Med Educ* 2015;**49**:4-6.
4. Pololi LH. Changing the culture of academic medicine: perspectives of women faculty. Lebanon, NH: UPNE, 2010.
5. Pololi LH, Civian JT, Brennan RT, Dottolo AL, Krupat E. Experiencing the culture of academic medicine: gender matters, a national study. *J Gen Intern Med* 2013;**28**:201-7.
6. Reed V, Buddeberg-Fischer B. Career obstacles for women in medicine: an overview. *Med Educ* 2001;**35**:139-47.
7. Risberg G, Johansson EE, Hamberg K. 'Important... but of low status': male education leaders' views on gender in medicine. *Med Educ* 2011;**45**:613-24.
8. Valentine H, Sandborg CI. Changing the culture of academic medicine to eliminate the gender leadership gap: 50/50 by 2020. *Acad Med* 2013;**88**:1411-3.
9. Bickel J, Wara D, Atkinson BF, et al. Increasing women's leadership in academic medicine: report of the AAMC Project Implementation Committee. *Acad Med* 2002;**77**:1043-61.



10. Magrane D, Morahan PS. Fortifying the Pipeline to Leadership: The International Center for Executive Leadership in Academics at Drexel. In: Rachelle S. Heller CM, Paul Sali Sabila, eds. *Forward to Professorship in STEM: Inclusive faculty development strategies that work*. San Diego, CA: Academic Press, 2016:319-336.
11. Morahan P, Bickel J. Capitalizing on women's intellectual capital in the professions. *Acad Med* 2002;**77**:110-2.
12. Isaac C, Lee B, Carnes M. Interventions that affect gender bias in hiring: a systematic review. *Acad Med* 2009;**84**:1440-6.
13. Travis EL, Doty L, Helitzer DL. Sponsorship: a path to the academic medicine C-suite for women faculty? *Acad Med* 2013;**88**:1414-17.
14. Burgess DJ, Joseph A, van Ryn M, Carnes M. Does stereotype threat affect women in academic medicine? *Acad Med* 2012;**87**:506-12.
15. Marchant A, Bhattacharya A, Carnes M. Can the Language of Tenure Criteria Influence Women's Academic Advancement? *J Womens Health* 2007;**16**:998-1003.
16. Alwazzan L, Rees CE. Women in medical education: views and experiences from the Kingdom of Saudi Arabia. *Med Educ* 2016;**50**:852-865.
17. McKimm J, Da Silva AS, Edwards S, Greenhill J, Taylor C. Women and Leadership in Medicine and Medical Education: International Perspectives. In: *International Perspectives on Equality, Diversity and Inclusion*. Vol 2. London: Emerald Group Publishing Limited, 2015:69-98.
18. Laver KE, Prichard IJ, Cations M, Osenk I, Govin K, Coveney JD. A systematic review of interventions to support the careers of women in academic medicine and other disciplines. *BMJ open* 2018;**8**:e020380.

19. Edmunds LD, Ovseiko PV, Shepperd S, et al. Why do women choose or reject careers in academic medicine? A narrative review of empirical evidence. *Lancet* 2016;**388**:2948-2958.
20. Penny M, Jeffries R, Grant J, Davies SC. Women and academic medicine: a review of the evidence on female representation. *JRSM Open* 2014;**107**:259-63.
21. Pololi LH, Krupat E, Civian JT, Ash AS, Brennan RT. Why are a quarter of faculty considering leaving academic medicine? A study of their perceptions of institutional culture and intentions to leave at 26 representative U.S. medical schools. *Acad Med* 2012;**87**:859-69.
22. Helitzer DL, Newbill SL, Cardinali G, Morahan PS, Chang S, Magrane D. Changing the Culture of Academic Medicine: Critical Mass or Critical Actors? *J Womens Health* 2017;**26**:540-8.
23. Pololi LH, Jones SJ. Women faculty :an analysis of their experiences in academic medicine and their coping strategies. *Gend Med* 2010;**7**:438-50.
24. Pololi L, Kern DE, Carr P, Conrad P, Knight S. The culture of academic medicine: faculty perceptions of the lack of alignment between individual and institutional values. *J Gen Intern Med* 2009;**24**:1289-95.
25. Cook AF, Arora VM, Rasinski KA, Curlin FA, Yoon JD. The prevalence of medical student mistreatment and its association with burnout. *Acad Med* 2014;**89**:749-54.
26. Frank E, Carrera JS, Stratton T, Bickel J, Nora LM. Experiences of belittlement and harassment and their correlates among medical students in the United States: longitudinal survey. *BMJ* 2006;**333**:682.

- 1  
2  
3 27. Komaromy M, Bindman AB, Haber RJ, Sande MA. Sexual harassment in medical  
4 training. *NEJM* 1993;**328**:322-326.  
5  
6  
7 28. Kwok S, Ostermeyer B, Coverdale J. A systematic review of the prevalence of patient  
8 assaults against residents. *J Grad Med Educ* 2012;**4**:296-300.  
9  
10  
11 29. Chaimowitz GA, Moscovitch A. Patient assaults on psychiatric residents: the  
12 Canadian experience. *Can J Psychiatry* 1991;**36**:107-11.  
13  
14  
15 30. Cohen JS, Leung Y, Fahey M, et al. The happy docs study: a Canadian Association of  
16 Internes and Residents well-being survey examining resident physician health and  
17 satisfaction within and outside of residency training in Canada. *BMC Res Notes*  
18 2008;**1**:105.  
19  
20  
21 31. Cohen JS, Patten S. Well-being in residency training: a survey examining resident  
22 physician satisfaction both within and outside of residency training and mental health  
23 in Alberta. *BMC Med Educ* 2005;**5**:21.  
24  
25  
26 32. Hoosen IA, Callaghan R. A survey of workplace bullying of psychiatric trainees in  
27 the West Midlands. *Psychiatr Bull* 2004;**28**:225-7.  
28  
29  
30 33. Keeley PW, Waterhouse ET, Noble SI. Prevalence and characteristics of bullying of  
31 trainees in palliative medicine. *Palliat Med* 2005;**19**:84-5.  
32  
33  
34 34. Nicolson P, Welsh CL. Sexual harassment, male dominated organizations and the role  
35 of counselling psychology: The case of medical school. *Couns Psychol Q*  
36 1993;**6**:291-301.  
37  
38  
39 35. National Initiative on Gender, Culture and Leadership in Medicine: C-Change.  
40 <http://cchange.brandeis.edu>. Accessed February 27, 2019.  
41  
42  
43  
44  
45  
46  
47  
48  
49  
50  
51  
52  
53  
54  
55  
56  
57  
58  
59  
60

- 1  
2  
3 36. Conrad P, Carr P, Knight S, Renfrew MR, Dunn MB, Pololi L. Hierarchy as a barrier  
4 to advancement for women in academic medicine. *J Womens Health* 2010;**19**:799-  
5  
6 805.  
7  
8  
9  
10 37. Pololi L, Cooper LA, Carr P. Race, Disadvantage and Faculty Experiences in  
11  
12 Academic Medicine. *J Gen Intern Med* 2010;**25**:1363-9.  
13  
14 38. Pololi L, Conrad P, Knight S, Carr P. A study of the relational aspects of the culture  
15 of academic medicine. *Acad Med* 2009;**84**:106-14.  
16  
17  
18 39. Pololi LH, Evans AT, Civian JT, et al. Faculty Vitality-Surviving the Challenges  
19 Facing Academic Health Centers: A National Survey of Medical Faculty. *Acad Med*  
20  
21 2015;**90**:930-6.  
22  
23  
24 40. Pololi LH, Evans AT. Group Peer Mentoring: An Answer to the Faculty Mentoring  
25 Problem? A Successful Program at a Large Academic Department of Medicine. *J*  
26  
27  
28  
29  
30  
31  
32  
33 41. Pololi LH, Krupat E, Schnell ER, Kern DE. Preparing culture change agents for  
34 academic medicine in a multi-institutional consortium: the C - change learning action  
35 network. *J Contin Educ Health Prof* 2013;**33**:244-57.  
36  
37  
38  
39 42. Schein EH. *Organizational Culture and Leadership*, 5th ed. Hoboken, NJ: Wiley,  
40  
41 2016.  
42  
43  
44 43. Northouse PG. *Leadership: Theory and Practice*, 7th ed. Thousand Oak, CA: Sage  
45  
46 Publications, 2016.  
47  
48  
49 44. Kirch DG. Presidential Address to AAMC 2007: Culture and the courage to change.  
50  
51 <https://www.aamc.org/download/169722/data/kirchspeech2007.pdf>. Accessed  
52  
53 February 2019.  
54  
55  
56  
57  
58  
59  
60

- 1  
2  
3 45. Magrane D, Helitzer D, Morahan P, et al. Systems of career influences: a conceptual  
4 model for evaluating the professional development of women in academic medicine.  
5  
6  
7  
8 *J Womens Health* 2012;**21**:1244-51.  
9
- 10 46. McKimm J, Wong J, Wright R, H OS. Developing clinical leadership capacity among  
11 UK foundation trainees. *Br J Hosp Med (Lond)* 2011;**72**:406-9.  
12  
13
- 14 47. Morahan PS, Rosen SE, Richman RC, Gleason KA. The leadership continuum: a  
15 framework for organizational and individual assessment relative to the advancement  
16 of women physicians and scientists. *J Womens Health* 2011;**20**:387-96.  
17  
18
- 19 48. Moher D, Liberati A, Tetzlaff J, Altman DG. Preferred reporting items for systematic  
20 reviews and meta-analyses: the PRISMA statement. *PLoS Med* 2009;**6**:e1000097.  
21  
22
- 23 49. Haig A, Dozier M. BEME Guide no 3: systematic searching for evidence in medical  
24 education--Part 1: Sources of information. *Med Teach* 2003;**25**:352-63.  
25  
26
- 27 50. Haig A, Dozier M. BEME Guide No. 3: Systematic searching for evidence in medical  
28 education--Part 2: Constructing searches. *Med Teach* 2003;**25**:463-84.  
29  
30
- 31 51. Reed DA, Cook DA, Beckman TJ, Levine RB, Kern DE, Wright SM. Association  
32 between funding and quality of published medical education research. *JAMA*  
33 2007;**298**:1002-9.  
34  
35
- 36 52. Hofler L, Hacker MR, Dodge LE, Ricciotti HA. Subspecialty and gender of obstetrics  
37 and gynecology faculty in department-based leadership roles. *Obstet Gynecol*  
38 2015;**125**:471-6.  
39  
40
- 41 53. Morahan PS, Gleason KA, Richman RC, Dannels S, McDade SA. Advancing Women  
42 Faculty to Senior Leadership in US Academic Health Centers: Fifteen Years of  
43 History in the Making. *J Women High Educ* 2010;**3**:140-65.  
44  
45  
46  
47  
48  
49  
50  
51  
52  
53  
54  
55  
56  
57  
58  
59

- 1  
2  
3 54. Weiss A, Lee KC, Tapia V, et al. Equity in surgical leadership for women: more work  
4 to do. *Am J Surg* 2014;**208**:494-8.  
5  
6  
7  
8 55. Baecher-Lind L. Women in leadership positions within obstetrics and gynecology:  
9 does the past explain the present? *Obstet Gynecol* 2012;**120**:1415-8.  
10  
11  
12 56. Burden M, Frank MG, Keniston A, et al. Gender disparities in leadership and  
13 scholarly productivity of academic hospitalists. *J Hosp Med* 2015;**10**:481-5.  
14  
15  
16 57. Cancian M, Aguiar L, Thavaseelan S. The Representation of Women in Urological  
17 Leadership. *Urol Pract* 2018;**5**:228-232.  
18  
19  
20 58. Carr PL, Raj A, Kaplan SE, Terrin N, Breeze JL, Freund KM. Gender Differences in  
21 Academic Medicine: Retention, Rank, and Leadership Comparisons From the  
22 National Faculty Survey. *Acad Med* 2018;**93**:1694-9.  
23  
24  
25 59. Cheng D, Promes S, Clem K, Shah A, Pietrobon R. Chairperson and faculty gender in  
26 academic emergency medicine departments. *Acad Emerg Med* 2006;**13**:904-6.  
27  
28  
29 60. Dannels S, McLaughlin J, Gleason KA, McDade SA, Richman R, Morahan PS.  
30 Medical school deans' perceptions of organizational climate: useful indicators for  
31 advancement of women faculty and evaluation of a leadership program's impact.  
32 *Acad Med* 2009;**84**:67-79.  
33  
34  
35 61. Dannels SA, Yamagata H, McDade SA, et al. Evaluating a leadership program: a  
36 comparative, longitudinal study to assess the impact of the Executive Leadership in  
37 Academic Medicine (ELAM) Program for Women. *Acad Med* 2008;**83**:488-95.  
38  
39  
40 62. Doyle M, Pederson A, Meltzer-Brody S. Demographic and Personal Characteristics  
41 of Male and Female Chairs in Academic Psychiatry. *Acad Psychiatry* 2016;**40**:402-9.  
42  
43  
44  
45  
46  
47  
48  
49  
50  
51  
52  
53  
54  
55  
56  
57  
58  
59  
60

- 1  
2  
3 63. Ellinas EH, Fouad N, Byars-Winston A. Women and the Decision to Leave, Linger,  
4 or Lean In: Predictors of Intent to Leave and Aspirations to Leadership and  
5 Advancement in Academic Medicine. *J Womens Health* 2018;**27**:324-32.  
6  
7  
8  
9  
10 64. Girod S, Fassiotto M, Grewal D, et al. Reducing Implicit Gender Leadership Bias in  
11 Academic Medicine With an Educational Intervention. *Acad Med* 2016;**91**:1143-50.  
12  
13  
14 65. Han J, Stillings S, Hamann H, Terry R, Moy L. Gender and Subspecialty of Urology  
15 Faculty in Department-based Leadership Roles. *Urology* 2017;**110**:36-39.  
16  
17  
18  
19 66. Helitzer DL, Newbill SL, Morahan PS, et al. Perceptions of skill development of  
20 participants in three national career development programs for women faculty in  
21 academic medicine. *Acad Med* 2014;**89**:896-903.  
22  
23  
24  
25  
26 67. Hofler LG, Hacker MR, Dodge LE, Schutzberg R, Ricciotti HA. Comparison of  
27 Women in Department Leadership in Obstetrics and Gynecology With Those in  
28 Other Specialties. *Obstet Gynecol* 2016;**127**:442-44.  
29  
30  
31  
32  
33 68. Kuhlmann E, Ovseiko PV, Kurmeyer C, et al. Closing the gender leadership gap: a  
34 multi-centre cross-country comparison of women in management and leadership in  
35 academic health centres in the European Union. *Hum Resour Health* 2017;**15**:2.  
36  
37  
38  
39  
40 69. Kvaerner KJ, Aasland OG, Botten GS. Female medical leadership: cross sectional  
41 study. *BMJ* 1999;**318**:91-94.  
42  
43  
44  
45 70. Levine RB, Gonzalez-Fernandez M, Bodurtha J, Skarupski KA, Fivush B.  
46 Implementation and evaluation of the Johns Hopkins University School of Medicine  
47 leadership program for women faculty. *J Womens Health* 2015;**24**:360-366.  
48  
49  
50  
51 71. Long TR, Elliott BA, Warner ME, Brown MJ, Rose SH. Resident and program  
52 director gender distribution by specialty. *J Womens Health* 2011;**20**:1867-1870.  
53  
54  
55  
56  
57  
58  
59

- 1  
2  
3  
4  
5  
6  
7  
8  
9  
10  
11  
12  
13  
14  
15  
16  
17  
18  
19  
20  
21  
22  
23  
24  
25  
26  
27  
28  
29  
30  
31  
32  
33  
34  
35  
36  
37  
38  
39  
40  
41  
42  
43  
44  
45  
46  
47  
48  
49  
50  
51  
52  
53  
54  
55  
56  
57  
58  
59  
60
72. McDade SA, Richman RC, Jackson GB, Morahan PS. Effects of participation in the Executive Leadership in Academic Medicine (ELAM) program on women faculty's perceived leadership capabilities. *Acad Med* 2004;**79**:302-309.
73. McLean MR, Morahan PS, Dannels SA, McDade SA. Geographic mobility advances careers: study of the Executive Leadership in Academic Medicine (ELAM) program for women. *Acad Med* 2013;**88**:1700-1706.
74. Monroe AK, Levine RB, Clark JM, Bickel J, MacDonald SM, Resar LM. Through a Gender Lens: A View of Gender and Leadership Positions in a Department of Medicine. *J Womens Health* 2015;**24**:837-842.
75. Puljak L, Kojundzic SL, Sapunar D. Gender and academic medicine: a good pipeline of women graduates is not advancing. *Teach Learn Med* 2008;**20**:273-278.
76. Reed DA, Enders F, Lindor R, McClees M, Lindor KD. Gender differences in academic productivity and leadership appointments of physicians throughout academic careers. *Acad Med* 2011;**86**:43-7.
77. Rotbart HA, McMillen D, Taussig H, Daniels SR. Assessing gender equity in a large academic department of pediatrics. *Acad Med* 2012;**87**:98-104.
78. Shah A, Braga L, Braga-Baiak A, Jacobs DO, Pietrobon R. The association of departmental leadership gender with that of faculty and residents in radiology. *Acad Radiol* 2007;**14**:998-1003.
79. Shah DN, Volpe NJ, Abbuhl SB, Pietrobon R, Shah A. Gender characteristics among academic ophthalmology leadership, faculty, and residents: results from a cross-sectional survey. *Ophthalmic Epidemiol* 2010;**17**:1-6.



- 1  
2  
3 80. Spalluto LB, Spottswood SE, Deitte LA, Chern A, Dewey CM. A Leadership  
4 Intervention to Further the Training of Female Faculty (LIFT-OFF) in Radiology.  
5  
6 *Acad Radiol* 2017;**24**:709-716.  
7  
8  
9  
10 81. Stadler DJ, Archuleta S, Ibrahim H, Shah NG, Al-Mohammed AA, Cofrancesco J, Jr.  
11 Gender and international clinician educators. *Postgrad Med J* 2017;**93**:719-724.  
12  
13  
14 82. White FS, McDade S, Yamagata H, Morahan PS. Gender-related differences in the  
15 pathway to and characteristics of U.S. medical school deanships. *Acad Med*  
16  
17 2012;**87**:1015-1023.  
18  
19  
20  
21 83. Willett LL, Halvorsen AJ, McDonald FS, Chaudhry SI, Arora VM. Gender  
22 differences in salary of internal medicine residency directors: a national survey. *Am J*  
23  
24 *Med* 2015;**128**:659-65.  
25  
26  
27  
28 84. Woodward Z, Rodriguez Z, Jou JH, et al. Gender disparities in gastroenterology  
29 fellowship director positions in the United States. *Gastrointest Endosc* 2017;**86**:595-  
30  
31 599.  
32  
33  
34  
35 85. Wright AL, Schwindt LA, Bassford TL, et al. Gender differences in academic  
36 advancement: patterns, causes, and potential solutions in one US College of  
37  
38 Medicine. *Acad Med* 2003;**78**:500-508.  
39  
40  
41  
42 86. Bass BM, Bass R. The Bass Handbook of Leadership: Theory, Research, and  
43  
44 Managerial Applications, 4th ed. New York, NY: Free Press, 2008.  
45  
46  
47 87. Tannenbaum R, Weschler IR, Massarik F. Leadership and Organization: A  
48  
49 Behavioral Science Approach. Whitefish, MT: Literary Licensing, LLC, 2012.  
50  
51  
52 88. Schein EH. Humble Inquiry: The Gentle Art of Asking Instead of Telling, 1st ed. San  
53  
54 Francisco, CA: Berrett-Koehler Publishers, 2013.  
55  
56  
57  
58  
59  
60

1  
2  
3 **Figure legends:**  
4

5 **Figure 1:** Flowchart of search strategy using PRISMA protocol.  
6

7  
8 **Table 1:** The extent of women's leadership in academic medicine.  
9

10 **Table 2:** Thematic analysis of the 15 quantitative articles that examined the hindering factors  
11 associated with women's leadership.  
12  
13

14 **Table 3:** Women's leadership programs in academic medicine.  
15  
16  
17  
18  
19  
20  
21  
22  
23  
24  
25  
26  
27  
28  
29  
30  
31  
32  
33  
34  
35  
36  
37  
38  
39  
40  
41  
42  
43  
44  
45  
46  
47  
48  
49  
50  
51  
52  
53  
54  
55  
56  
57  
58  
59  
60

**Table 1****The extent of women's leadership in academic medicine**

| Source                                                    | Population/Setting                                                                                               | % of women faculty or residents | outcome                                                                                                                    | Results % of women in leadership positions, p value, or odds ratio                                                                                                                                         |
|-----------------------------------------------------------|------------------------------------------------------------------------------------------------------------------|---------------------------------|----------------------------------------------------------------------------------------------------------------------------|------------------------------------------------------------------------------------------------------------------------------------------------------------------------------------------------------------|
| <b>Women in leadership positions within one-specialty</b> |                                                                                                                  |                                 |                                                                                                                            |                                                                                                                                                                                                            |
| Baecher-Lind 2012 <sup>55</sup>                           | Obstetrics & gynecology departments associated with the council of University Chairs of Obstetrics & Gynecology. | 36.8% of residents in 1980.     | The number of women in leadership is increasing, yet not proportionally to the number of women residents entering OB/GYNE. | 20% of DCs ( $p < 0.001$ )                                                                                                                                                                                 |
| Cheng et al. 2006 <sup>59</sup>                           | US emergency departments.                                                                                        | 22.3% of faculty                | Gender disparities exist.                                                                                                  | 7.5% of DCs & 15% of PDs. Departments chaired by women had significantly higher percentage of women faculty ( $p = 0.01$ ). Departments chaired by women were more likely to have women RPDs ( $p < .01$ ) |
| Cancian et al. 2017 <sup>57</sup>                         | US urology leadership programs.                                                                                  | NA                              | Disparities exist.                                                                                                         | 1.6% of DCs, & 11.2% of RPDs                                                                                                                                                                               |
| Doyle et al. 2016 <sup>62</sup>                           | US Psychiatry chairs                                                                                             | NA                              | Gender disparities exist. Women chairs perceived career barriers in their career development.                              | 10% of chairs were women. Male chairs were more likely than female chairs to head large departments ( $p = 0.02$ , CI -17.1-69.1)                                                                          |

|                                                                                              |                                   |                                                                                                  |                                                                                |                                                                                                                                                                    |                                                                                                                                                                                                                                                                                                               |
|----------------------------------------------------------------------------------------------|-----------------------------------|--------------------------------------------------------------------------------------------------|--------------------------------------------------------------------------------|--------------------------------------------------------------------------------------------------------------------------------------------------------------------|---------------------------------------------------------------------------------------------------------------------------------------------------------------------------------------------------------------------------------------------------------------------------------------------------------------|
| 1<br>2<br>3<br>4<br>5<br>6<br>7<br>8<br>9<br>10<br>11<br>12<br>13                            | Han et al.<br>2017 <sup>65</sup>  | US urology residency programs                                                                    | NA                                                                             | Disparities exist.                                                                                                                                                 | 3.3% of DCs, 4.5% of vice chairs, & 7.9% of division directors. For educational leadership roles, women comprised 9.4% of fellowship directors, 8.1% of residency directors, and 27.4% of medical student clerkship directors.                                                                                |
| 14<br>15<br>16<br>17<br>18<br>19<br>20<br>21<br>22<br>23<br>24<br>25<br>26<br>27<br>28<br>29 | Monroe et al. 2015 <sup>74</sup>  | Department of Medicine at Johns Hopkins University                                               | NA                                                                             | Gender disparities exist. Women leaders were proportionate to faculty. Women assistant professors were more likely to hold position than men assistant professors. | 50% of PDs, 33% PDs assistant/associate director, 27% fellowship program director, 80% of fellowship program assistant/associate director, & 37% of educational program director. Women assistant professors were more likely to hold leadership positions than were men assistant professors ( $p = 0.03$ ). |
| 30<br>31<br>32<br>33<br>34<br>35<br>36<br>37                                                 | Rotbart et al. 2012 <sup>77</sup> | Promotion track faculty the University of Colorado School of Medicine's Department of Pediatrics | 54% of assistant professors, 56% of associate professors, & 23% of professors. | Gender disparities exist with respect to section head, vice chair but not medical director positions                                                               | 25% of section heads & 14% of vice-chairs.                                                                                                                                                                                                                                                                    |
| 38<br>39<br>40<br>41<br>42<br>43<br>44<br>45<br>46<br>47                                     | Shah et al. 2007 <sup>78</sup>    | US radiology residency program directors.                                                        | 26% of residents, 26% of faculty.                                              | Gender disparities exists.                                                                                                                                         | 10.7% of DCs, 42.9% of PDs.                                                                                                                                                                                                                                                                                   |

|                                                                 |                                                                                     |                                                          |                                                                          |                                                                                                                           |                                                                                                                                        |
|-----------------------------------------------------------------|-------------------------------------------------------------------------------------|----------------------------------------------------------|--------------------------------------------------------------------------|---------------------------------------------------------------------------------------------------------------------------|----------------------------------------------------------------------------------------------------------------------------------------|
|                                                                 |                                                                                     |                                                          |                                                                          |                                                                                                                           | Gender composition of radiology faculty & residents does not differ significantly according to gender of leaders.                      |
| Shah et al. 2010 <sup>79</sup>                                  | US ophthalmology residency programs directors.                                      | Residents (45%), & faculty (28%)                         | Gender disparities exists.                                               | 2% of DCs, & 34% of PDs.                                                                                                  | Gender composition of ophthalmology faculty & residents does not differ significantly according to gender of leaders.                  |
| Woodward et al. 2017 <sup>84</sup>                              | US gastroenterology fellowship programs.                                            | NA                                                       | Gender disparities exist, & are more pronounced for division chiefs.     | 18% of PDs, 28% of associate program directors, 7% of division chiefs.                                                    | Gender of fellowship program director & gender of division chief ( $p= 0.0327$ ), no association with faculty or resident composition. |
| <b>Women in leadership positions across several-specialties</b> |                                                                                     |                                                          |                                                                          |                                                                                                                           |                                                                                                                                        |
| Burden et al. 2015 <sup>56</sup>                                | US academic adult hospital medicine (HM) & general internal medicine (GIM) programs | 49% of HM faculty, & 51% of GIM faculty in a 15% sample. | Gender disparities exist with respect to division or section leadership. | 16% of division or section heads of HM were women<br>35% of division or section heads of GIM were women<br>( $p = .008$ ) |                                                                                                                                        |
| Hofler et al. 2016 <sup>67</sup>                                | US academic departments of anesthesiology, diagnostic radiology, general surgery,   | Resident numbers are less than 50% in all studied        | Gender disparities exists.                                               | women comprised 13.9% of department chairs,                                                                               |                                                                                                                                        |

|                                  |                                                                                                                                                  |                                                                                                                                                                                                                          |                           |                                                                                                                                                                                                                                                                      |
|----------------------------------|--------------------------------------------------------------------------------------------------------------------------------------------------|--------------------------------------------------------------------------------------------------------------------------------------------------------------------------------------------------------------------------|---------------------------|----------------------------------------------------------------------------------------------------------------------------------------------------------------------------------------------------------------------------------------------------------------------|
|                                  | internal medicine, neurology, obstetrics & gynecology, pathology, pediatrics, & psychiatry.                                                      | specialties except pediatrics.                                                                                                                                                                                           |                           | 22.6% of vice chairs, 21.6% of division directors, & 39% of PDs.                                                                                                                                                                                                     |
|                                  |                                                                                                                                                  |                                                                                                                                                                                                                          |                           | Women significantly underrepresented in the combined leadership positions for all specialties (Ratios 0.61 or less; all $p < .001$ ) except anesthesiology & radiology                                                                                               |
| Long et al. 2011 <sup>71</sup>   | US residency program identified as the largest in JAMA (Brotherton SE, Etzel SI. Graduate medical education, 2009–2010. JAMA 2010;304:1255–1270) | 47.8% overall. 79.7% residents Obstetrics 73.2% Pediatrics, family medicine 55.1%, Psychiatry 54.9% Internal Medicine 44.8%, Emergency medicine 40.3%, Anesthesiology 37.5% Surgery, 35% Radiology 28% Orthopedics 13.3% | Gender disparities exist  | 25.8% of program directors overall were women. program directors 35.2% Obstetrics, 49% Pediatrics, 23.6% Family Medicine, 34.6% Psychiatry, 24.3% Internal Medicine, 18.8% Emergency Medicine, 29% Anesthesiology, 10.8% Surgery, 27.7% Radiology, 6.5% Orthopedics. |
| Puljak et al. 2008 <sup>75</sup> | University of Split School of Medicine in Croatia.                                                                                               | 43% of faculty                                                                                                                                                                                                           | Gender disparities exist. | 18-21% of DCs in 1997-2006.                                                                                                                                                                                                                                          |

|                                                                                                    |                                     |                                                                                                                                                                                                                      |                                                                                                                                              |                                                                |                                                                                                                                                                                                                                                                                                    |
|----------------------------------------------------------------------------------------------------|-------------------------------------|----------------------------------------------------------------------------------------------------------------------------------------------------------------------------------------------------------------------|----------------------------------------------------------------------------------------------------------------------------------------------|----------------------------------------------------------------|----------------------------------------------------------------------------------------------------------------------------------------------------------------------------------------------------------------------------------------------------------------------------------------------------|
| 1<br>2<br>3<br>4<br>5<br>6<br>7<br>8<br>9<br>10<br>11<br>12<br>13<br>14<br>15<br>16<br>17<br>18    | Reed et al.<br>2011 <sup>76</sup>   | women scholarly<br>clinicians employed at<br>Mayo Clinic with 20 or<br>more years of service at Mayo<br>Clinic,<br>who spend<br>more than 25% of their<br>professional<br>effort directly providing patient<br>care. | NA                                                                                                                                           | Gender disparities<br>exist.                                   | 56% of women held divisional,<br>departmental, institutional or national<br>positions during their careers.<br>Total leadership position attainment<br>between men and women ( $p < 0.001$ )                                                                                                       |
| 19<br>20<br>21<br>22<br>23<br>24<br>25<br>26<br>27<br>28<br>29<br>30<br>31<br>32<br>33<br>34<br>35 | Weiss et al.<br>2014 <sup>54</sup>  | US general surgery, orthopedic<br>surgery, otolaryngology,<br>neurosurgery, plastic surgery, and<br>urology programs.                                                                                                | Medical students 48%,<br>Residents (14-37%), &<br>faculty (assistant professor<br>19-29%; associate<br>professor 13-21%;<br>professor 7-11%) | Gender disparities<br>exist.                                   | General surgery chairs 3% & PDs 10%<br>( $p = .002$ )<br>Orthopedic Surgery 0% & PDs 6% ( $p =$<br>.002)<br>Otolaryngology 5% of chairs & 13% of<br>PDs ( $p = .045$ )<br>Neurosurgery 1% of chairs & 3% of<br>PDs<br>Plastic Surgery 6% of chairs & 9%<br>of PDs<br>Urology 3% of chairs & 6% PDs |
| 36<br>37<br>38<br>39<br>40<br>41<br>42<br>43<br>44<br>45<br>46<br>47                               | Wright et<br>al. 2003 <sup>85</sup> | Faculty members of the school of<br>medicine at the University of<br>Arizona                                                                                                                                         | NA                                                                                                                                           | Gender disparities<br>exist, women were<br>less likely be part | 55% served as committee chair, 10% as<br>section or division head, & 8% as<br>department chairs.                                                                                                                                                                                                   |

|                                                               |                                                                                                            |    |  |                                                                   |                                                                                                                                            |
|---------------------------------------------------------------|------------------------------------------------------------------------------------------------------------|----|--|-------------------------------------------------------------------|--------------------------------------------------------------------------------------------------------------------------------------------|
|                                                               |                                                                                                            |    |  | of decision making process, or advise chairs.                     | As compared to men: (p=0.03), (p=0), (p=0.003)                                                                                             |
| <b>Women leaders across several institutions or countries</b> |                                                                                                            |    |  |                                                                   |                                                                                                                                            |
| Carr et al. 2018 <sup>58</sup>                                | US Academic medical faculty                                                                                | NA |  | Gender disparities exist & are related to scholarly productivity. | 10% of women in sample had leadership roles ( $p < 0.0001$ ). After adjusting for scholarly productivity, the OR = 0.49 (95% CI, 0.35-.69) |
| Kvaerner et al. 1999 <sup>69</sup>                            | Norwegian physicians.                                                                                      | NA |  | Gender disparity exists.                                          | 6.4% of women were leaders. 95% CI (2.6-13.9)                                                                                              |
| Stadler et al. 2017 <sup>81</sup>                             | Clinician educators & leadership of competency based graduate medical education in Qatar, Singapore, & UAE | NA |  | Gender disparity exists.                                          | 22.1% of program directors & 22.1% of associate program directors.                                                                         |

Abbreviations: NA, not available; PD, program director



**Table 2****Thematic analysis of the 15 quantitative articles that examined the hindering factors associated with women's leadership.**

| Theme                                 | Outcome                                                           | Result                                                                                                                                                                                                                                                                                                                                                      |
|---------------------------------------|-------------------------------------------------------------------|-------------------------------------------------------------------------------------------------------------------------------------------------------------------------------------------------------------------------------------------------------------------------------------------------------------------------------------------------------------|
| <b>Barriers to women's leadership</b> |                                                                   |                                                                                                                                                                                                                                                                                                                                                             |
| Policy development & translation      | Dismissal of work-life balance measures.                          | Out of the 15 family-friendly policies, only 3 were available at more than 68% of medical schools: benefits for part-time faculty, paid maternity & paternity leave. <sup>60</sup>                                                                                                                                                                          |
|                                       | Dismissal of diversity & inclusion measures.                      | Fewer than 14% of schools implemented gender equity specific policies. <sup>60</sup>                                                                                                                                                                                                                                                                        |
|                                       | Incongruence between organizational values & individual values.   | Women faculty showed more negative perceptions on equity for women (T=-19.82, p<0.001); institutional change efforts for diversity (T=-9.70, p<0.001). <sup>5</sup>                                                                                                                                                                                         |
| Stereotyping                          | Existence of gendered language in leadership associated policies. | Women faculty showed more negative perceptions on values alignment (T= -2.06, p<0.05). <sup>5</sup>                                                                                                                                                                                                                                                         |
|                                       | Existence of gendered language in leadership associated policies. | Being a leader is associated with being male (M= 2.4, SD=2.2 – OR= 6, CI 1.02, 35.37) & traditionally male associated traits: analytical (M=2.5, SD=2.4); independent (M= 3.1, SD= 2.6 – OR=1, CI 0.2, 5.1); & individualistic (M=1.8, SD= 1.5 – OR= 1, CI 0.2, 5.4) in medical school tenure criteria, affecting leader selection decisions. <sup>15</sup> |
|                                       | Existence of implicit gender bias, favoring men as leaders.       | Slight implicit preference for men leaders over women (IAT D score = .16, SD = 0.42). <sup>64</sup>                                                                                                                                                                                                                                                         |

|                                                                         |                                                    |                                                                                                                                                                                 |                                                                                                                                                                                                                                                                                                                                                                                                                                                                                                 |
|-------------------------------------------------------------------------|----------------------------------------------------|---------------------------------------------------------------------------------------------------------------------------------------------------------------------------------|-------------------------------------------------------------------------------------------------------------------------------------------------------------------------------------------------------------------------------------------------------------------------------------------------------------------------------------------------------------------------------------------------------------------------------------------------------------------------------------------------|
| 1<br>2<br>3<br>4<br>5<br>6<br>7<br>8<br>9<br>10<br>11<br>12<br>13<br>14 | Research<br>Production                             | Increased production of research is associated with leadership attainment.<br>Timing of leadership appointments (mid-career) negatively affected by modest research production. | Senior leadership positions were more likely held by male faculty despite research publications (OR = 0.49; 95% CI, 0.35–0.69). <sup>58</sup><br>Women published fewer articles throughout their careers than men (M = 29.5, SD = 28.8 versus M = 75.8, SD = 60.3 – $p = .001$ ). However, after 27 years, women produced a mean of 1.57 more publications annually than men ( $p = .001$ ). Throughout their careers, women held fewer leadership roles than men ( $p = .001$ ). <sup>76</sup> |
| 15<br>16<br>17<br>18<br>19                                              | Mentorship                                         | Lack of mentorship may hinder women from becoming leaders.                                                                                                                      | Women chairs were more likely than men chairs to perceive barriers in their career development citing little or no mentorship ( $p=0.04$ ). <sup>62</sup>                                                                                                                                                                                                                                                                                                                                       |
| 20<br>21<br>22<br>23<br>24                                              | Time of<br>academic<br>appointment                 | Entering academia belatedly may contribute to leadership disparities.                                                                                                           | Women faculty in the UCSOM Department of Pediatrics entered academia at a later career stage, in part, resulted in women trying to advance at a later stage than men in academic position and tenure. <sup>77</sup>                                                                                                                                                                                                                                                                             |
| 25<br>26<br>27<br>28<br>29<br>30<br>31<br>32<br>33                      | Educational<br>background &<br>advanced<br>degrees | Educational background & types of degrees may influence leadership selection.                                                                                                   | A greater percentage of male deans graduated from the top 50 NIH-ranked research-award schools than women deans ( $p = .005$ , $\omega^2 = 23.3%$ , $\eta^2 = 25.4%$ )<br>Doctorate degrees were more prevalent among men deans as opposed to business-related degrees among women (MBA, MHA, MPH, or JD). <sup>82</sup>                                                                                                                                                                        |

1  
2  
3  
4  
5  
6  
7  
8  
9  
10  
11  
12  
13  
14  
15  
16  
17  
18  
19  
20  
21  
22  
23  
24  
25  
26  
27  
28  
29  
30  
31  
32  
33  
34  
35  
36  
37  
38  
39  
40  
41  
42  
43  
44  
45  
46  
47

**Table 3****Women's leadership programs in academic medicine**

| Citation                          | Program/initiative | Purpose                                                                                                                                                                                                    | Outcome                                                                                                  | Result                                                                                                                                                                                                                                                                                                                                                                               |
|-----------------------------------|--------------------|------------------------------------------------------------------------------------------------------------------------------------------------------------------------------------------------------------|----------------------------------------------------------------------------------------------------------|--------------------------------------------------------------------------------------------------------------------------------------------------------------------------------------------------------------------------------------------------------------------------------------------------------------------------------------------------------------------------------------|
| Dannels et al. 2009 <sup>60</sup> | ELAM               | Evaluate a leadership program's & its impact from medical school leadership perspective.                                                                                                                   | Positive impact on its alumnae & their schools.                                                          | Medical school deans' (M = 5.62 out of 7), with those having more fellows reporting greater benefit ( $p = 0.01$ ), positive influence on alumnae (M = 6.27), & increase their eligibility for promotion (M = 5.7)                                                                                                                                                                   |
| Dannels et al. 2008 <sup>61</sup> | ELAM               | Determine the extent to which program participants, compared with women from two comparison groups, aspire to leadership, demonstrate mastery of leadership competencies, and attain leadership positions. | ELAM program has a beneficial impact on fellows in terms of leadership behaviors and career progression. | ELAM participants scored higher than AAMC & NON-groups in 15 of the indicators, and for 1 indicator they scored higher than the AAMC group (aspiration to leadership outside academic health centers).<br>The differences were statistically significant for 12 indicators.<br>Indicators, including 7 of the leadership competencies, 3 of the administrative leadership attainment |

|                                    |                                                                                  |                                                                                                                      |                                                                         |                                                                                                                                                                      |
|------------------------------------|----------------------------------------------------------------------------------|----------------------------------------------------------------------------------------------------------------------|-------------------------------------------------------------------------|----------------------------------------------------------------------------------------------------------------------------------------------------------------------|
|                                    |                                                                                  |                                                                                                                      |                                                                         | indicators, & 2 of the leadership aspirations & education indicators.                                                                                                |
| Helitzer et al. 2014 <sup>66</sup> | EWIM<br>MidWIM<br>ELAM                                                           | Perceptions of CPD program alumnae of CPD.                                                                           | Participants reported gained & improved career skills from CPDs.        | Across all 3 CPDs leadership aspiration was aligned with career stage; full professors reported more interest in leadership than associate professors ( $p = .043$ ) |
| Levine et al. 2015 <sup>70</sup>   | Johns Hopkins University School of Medicine Leadership Program for Women Faculty | Evaluation of 3 cohorts of a longitudinal program.                                                                   | Women reported improved leadership skills.                              | Significant improvement across 11 leadership domains except: public speaking & working in teams.                                                                     |
| McDade et al. 2004 <sup>72</sup>   | ELAM                                                                             | Measures impact of ELAM program.                                                                                     | Increased leadership capabilities across all ten identified constructs. | ( $p < 0.01$ )                                                                                                                                                       |
| Spalluto et al. 2017 <sup>80</sup> | LIFT-OFF                                                                         | Report of design, implementation, & evaluation of leadership intervention to further the training of female faculty. | 31% of educational modules were useful.                                 | ( $p < 0.05$ )                                                                                                                                                       |

1  
2  
3  
4  
5  
6  
7  
8  
9  
10  
11  
12  
13  
14  
15  
16  
17  
18  
19  
20  
21  
22  
23  
24  
25  
26  
27  
28  
29  
30  
31  
32  
33  
34  
35  
36  
37  
38  
39  
40  
41  
42  
43  
44  
45  
46  
47  
48  
49  
50  
51  
52  
53  
54  
55  
56  
57  
58  
59  
60

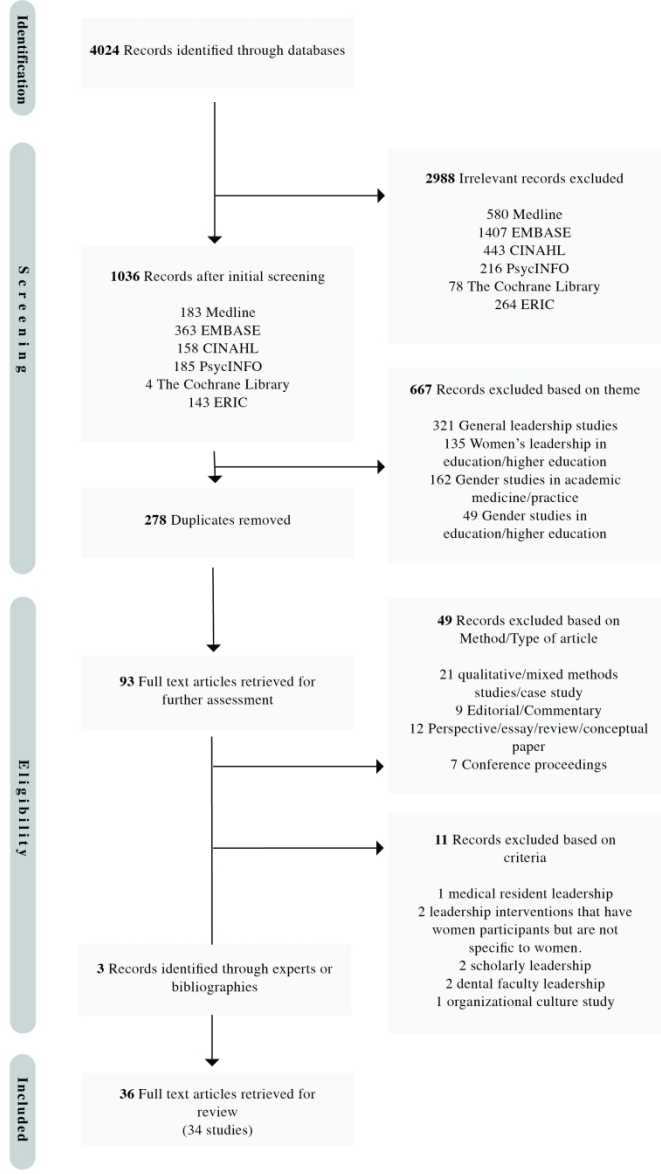

Flowchart of search strategy using PRISMA protocol.

## Supplementary material 1

Search terms and number of results for review of women's leadership in academic medicine

| Database              | Date               | Search query                                                                                                                                               | Results, n |
|-----------------------|--------------------|------------------------------------------------------------------------------------------------------------------------------------------------------------|------------|
| Ovid Medline          | 1946 May 2018      | (Women OR woman OR female OR females OR girl OR girls)                                                                                                     | 763        |
| EMBASE                | 1974 to May 2018   | AND                                                                                                                                                        | 1773       |
| CINAHL                | 1989 to May 2018   | (Leadership OR Leader OR leaders OR leading)                                                                                                               | 601        |
| Ovid PsycINFO         | 1967 to April 2018 | AND                                                                                                                                                        | 401        |
| The Cochrane Library* | -                  | (Medical education OR academic medicine OR health professions education or health profession education OR professional development OR faculty development) | 82         |
| ERIC                  | 1965 to April 2018 |                                                                                                                                                            | 407        |

\*The library includes: Cochrane Database of Systematic Reviews (2005 to May 2018), EBM Reviews - ACP Journal Club (1991 to May 2018), EBM Reviews - Database of Abstracts of Reviews of Effects (1st Quarter 2016), EBM Reviews - Cochrane Clinical Answers.

## Supplementary material 2

Reporting checklist for systematic review and meta-analysis based on the PRISMA guidelines.

|                           |    | Reporting Item                                                                                                                                                                                                                                                                                             | Page |
|---------------------------|----|------------------------------------------------------------------------------------------------------------------------------------------------------------------------------------------------------------------------------------------------------------------------------------------------------------|------|
| <b>Title</b>              |    |                                                                                                                                                                                                                                                                                                            |      |
|                           | #1 | Identify the report as a systematic review, meta-analysis, or both.                                                                                                                                                                                                                                        | 1    |
| <b>Abstract</b>           |    |                                                                                                                                                                                                                                                                                                            |      |
| Structured summary        | #2 | Provide a structured summary including, as applicable: background; objectives; data sources; study eligibility criteria, participants, and interventions; study appraisal and synthesis methods; results; limitations; conclusions and implications of key findings; systematic review registration number | 2    |
| <b>Introduction</b>       |    |                                                                                                                                                                                                                                                                                                            |      |
| Rationale                 | #3 | Describe the rationale for the review in the context of what is already known.                                                                                                                                                                                                                             | 5-7  |
| Objectives                | #4 | Provide an explicit statement of questions being addressed with reference to participants, interventions, comparisons, outcomes, and study design (PICOS).                                                                                                                                                 | 8    |
| <b>Methods</b>            |    |                                                                                                                                                                                                                                                                                                            |      |
| Protocol and registration | #5 | Indicate if a review protocol exists, if and where it can be accessed (e.g., Web address) and, if available, provide registration information including the registration number.                                                                                                                           | n/a  |
| Eligibility criteria      | #6 | Specify study characteristics (e.g., PICOS, length of follow-up) and report characteristics (e.g., years considered, language, publication status) used as criteria for eligibility, giving rational                                                                                                       | 9    |
| Information sources       | #7 | Describe all information sources in the search (e.g., databases with dates of coverage, contact with study authors to identify additional studies) and date last searched.                                                                                                                                 | 8-9  |
| Search                    | #8 | Present full electronic search strategy for at least one database, including any limits used, such that it could be repeated.                                                                                                                                                                              | 8-9  |

|                                    |     |                                                                                                                                                                                                                                 |       |
|------------------------------------|-----|---------------------------------------------------------------------------------------------------------------------------------------------------------------------------------------------------------------------------------|-------|
| Study selection                    | #9  | State the process for selecting studies (i.e., for screening, for determining eligibility, for inclusion in the systematic review, and, if applicable, for inclusion in the meta-analysis).                                     | 8-10  |
| Data collection process            | #10 | Describe the method of data extraction from reports (e.g., piloted forms, independently by two reviewers) and any processes for obtaining and confirming data from investigators.                                               | 8-10  |
| Data items                         | #11 | List and define all variables for which data were sought (e.g., PICOS, funding sources), and any assumptions and simplifications made.                                                                                          | 10    |
| Risk of bias in individual studies | #12 | Describe methods used for assessing risk of bias in individual studies (including specification of whether this was done at the study or outcome level, or both), and how this information is to be used in any data synthesis. | 10    |
| Summary measures                   | #13 | State the principal summary measures (e.g., risk ratio, difference in means).                                                                                                                                                   | n/a   |
| Planned methods of analysis        | #14 | Describe the methods of handling data and combining results of studies, if done, including measures of consistency (e.g., I <sup>2</sup> ) for each meta-analysis.                                                              | n/a   |
| Risk of bias across studies        | #15 | Specify any assessment of risk of bias that may affect the cumulative evidence (e.g., publication bias, selective reporting within studies).                                                                                    | n/a   |
| Additional analyses                | #16 | Describe methods of additional analyses (e.g., sensitivity or subgroup analyses, meta-regression), if done, indicating which were pre-specified.                                                                                | n/a   |
| <b>Results</b>                     |     |                                                                                                                                                                                                                                 |       |
| Study selection                    | #17 | Give numbers of studies screened, assessed for eligibility, and included in the review, with reasons for exclusions at each stage, ideally with a <u>flow diagram</u> .                                                         | 10-11 |
| Study characteristics              | #18 | For each study, present characteristics for which data were extracted (e.g., study size, PICOS, follow-up period) and provide the citation.                                                                                     | 11    |
| Risk of bias within studies        | #19 | Present data on risk of bias of each study and, if available, any outcome-level assessment (see Item 12).                                                                                                                       | 11-12 |



|                                                                                                                                                                                                                                                                               |                               |     |                                                                                                                                                                                                               |       |
|-------------------------------------------------------------------------------------------------------------------------------------------------------------------------------------------------------------------------------------------------------------------------------|-------------------------------|-----|---------------------------------------------------------------------------------------------------------------------------------------------------------------------------------------------------------------|-------|
| 1<br>2<br>3<br>4<br>5<br>6<br>7<br>8<br>9<br>10<br>11<br>12<br>13<br>14<br>15<br>16<br>17<br>18<br>19<br>20<br>21<br>22<br>23<br>24<br>25<br>26<br>27<br>28<br>29<br>30<br>31<br>32<br>33<br>34<br>35<br>36<br>37<br>38<br>39<br>40<br>41<br>42<br>43<br>44<br>45<br>46<br>47 | Results of individual studies | #20 | For all outcomes considered (benefits and harms), present, for each study: (a) simple summary data for each intervention group and (b) effect estimates and confidence intervals, ideally with a forest plot. | 10-16 |
|                                                                                                                                                                                                                                                                               | Synthesis of results          | #21 | Present the main results of the review. If meta-analyses are done, include for each, confidence intervals and measures of consistency.                                                                        | n/a   |
|                                                                                                                                                                                                                                                                               | Risk of bias across studies   | #22 | Present results of any assessment of risk of bias across studies (see Item 15).                                                                                                                               | n/a   |
|                                                                                                                                                                                                                                                                               | Additional analysis           | #23 | Give results of additional analyses, if done (e.g., sensitivity or subgroup analyses, meta-regression [see Item 16]).                                                                                         | n/a   |
|                                                                                                                                                                                                                                                                               | <b>Discussion</b>             |     |                                                                                                                                                                                                               |       |
|                                                                                                                                                                                                                                                                               | Summary of Evidence           | #24 | Summarize the main findings, including the strength of evidence for each main outcome; consider their relevance to key groups (e.g., health care providers, users, and policy makers                          | 16-19 |
|                                                                                                                                                                                                                                                                               | Limitations                   | #25 | Discuss limitations at study and outcome level (e.g., risk of bias), and at review level (e.g., incomplete retrieval of identified research, reporting bias).                                                 | 19-20 |
|                                                                                                                                                                                                                                                                               | Conclusions                   | #26 | Provide a general interpretation of the results in the context of other evidence, and implications for future research.                                                                                       | 20    |
|                                                                                                                                                                                                                                                                               | <b>Funding</b>                |     |                                                                                                                                                                                                               |       |
|                                                                                                                                                                                                                                                                               | Funding                       | #27 | Describe sources of funding or other support (e.g., supply of data) for the systematic review; role of funders for the systematic review.                                                                     | 21    |

### Supplementary material 3

Characteristics of the 34 articles reviewed from earliest date available – April 2018.

| Citation                           | Country | Study Design         | Study Purpose                                                                                                                                     | Time Frame            | N +/- RR                                                           | Data Source                                                                                                                                         | Methodological limitations                                                                                                                                                                                                                                                                                                                                                                                      | MERSQI Score |
|------------------------------------|---------|----------------------|---------------------------------------------------------------------------------------------------------------------------------------------------|-----------------------|--------------------------------------------------------------------|-----------------------------------------------------------------------------------------------------------------------------------------------------|-----------------------------------------------------------------------------------------------------------------------------------------------------------------------------------------------------------------------------------------------------------------------------------------------------------------------------------------------------------------------------------------------------------------|--------------|
| Baecher-Lind, 2012 <sup>55</sup> ¶ | USA     | Retrospective cohort | Determine whether the proportion of leadership positions in OBS/GYNE held by women is consistent with the proportion of women entering residency. | July-Aug 2012         | 155 academic department chairs                                     | Department websites for name & sex of leader & state medical license databases for graduation year.                                                 | <p><i>Limited population:</i> no report on other leadership positions: vice-chairs, program directors, or unit heads.</p> <p><i>Lack of contextual demographic data:</i> ethnicity, marital status, or age.</p> <p><i>Lack of contextual career data:</i> career stage, dual leadership appointments, or formal leadership training.</p> <p>Does not differentiate community-based &amp; academic programs.</p> | 10.5         |
| Burden et al., 2015 <sup>56</sup>  | USA     | Retrospective cohort | Determine the existence of gender disparities among academic hospitalists in leadership & scholarly productivity & compare the results            | Oct, 2012 – Aug, 2014 | 69 Hospital Medicine (HM) Programs<br>80 General Internal Medicine | Graduate Medical Education Directory (AAMC listed members fully accredited by the Liaison Committee on Medical Education) for programs & department | <p><i>No information on or adjustment for size, age or geographic location of HM or GIM departments.</i></p> <p>It was unclear whether HM departments were divisions or sections of GIM departments.</p>                                                                                                                                                                                                        | 10.5         |

|                                      |     |                    |                                                                                                                    |              |                                                                  |                                                                                                                     |                                                                                                                                                                                                                                                          |     |
|--------------------------------------|-----|--------------------|--------------------------------------------------------------------------------------------------------------------|--------------|------------------------------------------------------------------|---------------------------------------------------------------------------------------------------------------------|----------------------------------------------------------------------------------------------------------------------------------------------------------------------------------------------------------------------------------------------------------|-----|
|                                      |     |                    | with academic general internists.                                                                                  |              | (GIM) Programs                                                   | websites for sex of leaders, & number/sex of faculty, & Program contacted through email if necessary                |                                                                                                                                                                                                                                                          |     |
| Cancian et al., 2018 <sup>57</sup> ¶ | USA | Cross-sectional    | Determine the number of women in urological leadership positions.                                                  | July 2016    | NA                                                               | Accreditation Council for Graduate Medical Education.                                                               | <i>Lack of contextual demographic data:</i> ethnicity, marital status, or age.<br><br><i>Lack of contextual career data:</i> dual leadership appointments, or formal leadership training.<br><br>Not clear which departments were academic vs community. | 8.5 |
| Carr et al., 2018 <sup>58</sup> §    | USA | Prospective cohort | Identify predictors of advancement, retention, & leadership for women faculty from a 1995 National Faculty Survey. | 1995-2012/13 | 1995: 1801 faculty, RR = 60%<br><br>2012: 1273 faculty, RR = 48% | Mailed national faculty questionnaire conducted in 1995 & a follow-up online self-reported questionnaire in 2012-13 | No methodological deficits were identified.                                                                                                                                                                                                              | 12  |
| Cheng et al., 2006 <sup>59</sup>     | USA | Cross-sectional    | Determine if there is an association between the gender                                                            | Dec, 2004    | 133 EM programs                                                  | Society for Academic Emergency                                                                                      | Authors claim retrospective design & although trend of chairperson gender is                                                                                                                                                                             | 9.5 |

1  
2  
3  
4  
5  
6  
7  
8  
9  
10  
11  
12  
13  
14  
15  
16  
17  
18  
19  
20  
21  
22  
23  
24  
25  
26  
27  
28  
29  
30  
31  
32  
33  
34  
35  
36  
37  
38  
39  
40  
41  
42  
43  
44  
45  
46

|                                      |     |                                            |                                                                                                                                                                                                                |         |                                                                                              |                                                                                                      |                                                                                                                                                                                                                                                            |      |
|--------------------------------------|-----|--------------------------------------------|----------------------------------------------------------------------------------------------------------------------------------------------------------------------------------------------------------------|---------|----------------------------------------------------------------------------------------------|------------------------------------------------------------------------------------------------------|------------------------------------------------------------------------------------------------------------------------------------------------------------------------------------------------------------------------------------------------------------|------|
|                                      |     |                                            | of the chairperson/program director & the gender of Emergency Medicine (EM) faculty.                                                                                                                           |         |                                                                                              | Medicine online residency catalog, program websites, & program contacted through email if necessary. | reported, this does not qualify as a retrospective cohort.<br><br><i>Lack of contextual demographic data:</i> Ethnicity, marital status, or age.<br><br><i>Lack of contextual career data:</i> dual leadership appointments or formal leadership training. |      |
| Dannels et al., 2008 <sup>60</sup> # | USA | Pre/post intervention & prospective cohort | Determine the extent of leadership aspiration, mastery of leadership competencies, & attainment of leadership positions amongst graduates of the ELAM compared to 2 comparison groups (NON-ELAM & AAMC group). | 2002-06 | 78 ELAM graduates, RR = 73%<br><br>63 NON-ELAM group, RR= 44%<br><br>468 AAMC group, RR= 38% | Online self-reported questionnaires.                                                                 | No methodological deficits were identified.                                                                                                                                                                                                                | 12.5 |

1  
2  
3  
4  
5  
6  
7  
8  
9  
10  
11  
12  
13  
14  
15  
16  
17  
18  
19  
20  
21  
22  
23  
24  
25  
26  
27  
28  
29  
30  
31  
32  
33  
34  
35  
36  
37  
38  
39  
40  
41  
42  
43  
44  
45  
46

|                                      |     |                 |                                                                                                                                                                                                                                            |             |                                                                                                          |                                                                                                                                                                                                                 |                                                                                                                                                                                                                                                                                |      |
|--------------------------------------|-----|-----------------|--------------------------------------------------------------------------------------------------------------------------------------------------------------------------------------------------------------------------------------------|-------------|----------------------------------------------------------------------------------------------------------|-----------------------------------------------------------------------------------------------------------------------------------------------------------------------------------------------------------------|--------------------------------------------------------------------------------------------------------------------------------------------------------------------------------------------------------------------------------------------------------------------------------|------|
| Dannels et al., 2009 <sup>61</sup> # | USA | Cross-sectional | Elicit the perceptions of deans on their medical schools' organizational climate & its effect on faculty, policies affecting faculty, processes deans use for developing faculty leadership, and the impact of the ELAM Program for Women. | May, 2006   | 142 medical school deans:<br><br>Overall RR= 58%<br><br>72 men RR=57%<br><br>11 women RR=69%             | AAMC for medical schools & online self-reported questionnaire.                                                                                                                                                  | Small sample size of women deans limits detecting relevant statistical effect.<br><br><i>Lack of contextual demographic data:</i> Ethnicity, marital status, or age.<br><br><i>Lack of contextual career data:</i> dual leadership appointments or formal leadership training. | 10.5 |
| Doyle et al, 2016 <sup>62</sup>      | USA | Cross-sectional | Investigate the causative factors contributing to gender disparity in senior leadership positions in academic psychiatry.                                                                                                                  | April, 2014 | 118 (final n =109)<br><br>Overall RR = 39%<br><br>97 men chairs RR = 34%<br><br>12 women chairs, RR= 83% | Publicly available data: American Association of Chairs of Departments of Psychiatry (AACDP) for psychiatry chair names, department websites for demographic information, & online self-reported questionnaire. | Problematic survey design: Assumption of prior leadership knowledge.<br><br>Objective does not align with study design: causation cannot be established in cross-sectional study designs.                                                                                      | 8    |

|                                                                      |                                      |     |                       |                                                                                                                                                   |                       |                                                  |                                                                                                                                                 |                                                                                                                                                                                          |     |
|----------------------------------------------------------------------|--------------------------------------|-----|-----------------------|---------------------------------------------------------------------------------------------------------------------------------------------------|-----------------------|--------------------------------------------------|-------------------------------------------------------------------------------------------------------------------------------------------------|------------------------------------------------------------------------------------------------------------------------------------------------------------------------------------------|-----|
| 1<br>2<br>3<br>4<br>5<br>6<br>7<br>8<br>9                            | Ellinas et al., 2018 <sup>63</sup> § | USA | Cross-sectional       | Identify factors that promote medical faculty's engagement & gender difference in those factors.                                                  | June-Aug, 2013        | 1456 faculty members<br>RR= 42%<br><br>227 women | Online self-reported questionnaire.                                                                                                             | No methodological deficits were identified.                                                                                                                                              | 9   |
| 10<br>11<br>12<br>13<br>14<br>15<br>16<br>17<br>18<br>19<br>20<br>21 | Girod et al., 2016 <sup>64</sup>     | USA | Pre/post intervention | Investigate the implicit & explicit biases favoring men as leaders & assess whether these attitudes change following an educational intervention. | March 2012-April 2013 | 281 faculty members                              | Questionnaire for general perceptions of bias, measure of explicit attitudes related to gender & leadership, & Implicit Association Test (IAT). | Findings limited by lack of longitudinal data on effectiveness of intervention.                                                                                                          | 9.5 |
| 22<br>23<br>24<br>25<br>26<br>27<br>28<br>29<br>30<br>31<br>32<br>33 | Han et al., 2017 <sup>65</sup> §     | USA | Cross-sectional       | Determine the gender & subspecialty of those holding academic departmental, administrative & educational leadership roles in urology.             | June-Aug, 2016        | 124 urology programs                             | Accreditation Council for Graduate Medical Education for programs & Urology department websites for main data. Program contacted if necessary.  | <i>Lack of contextual demographic data:</i> Ethnicity, marital status, or age.<br><br><i>Lack of contextual career data:</i> dual leadership appointments or formal leadership training. | 8.5 |
| 34<br>35<br>36<br>37<br>38<br>39<br>40<br>41<br>42                   | Helitzer et al., 2014 <sup>66</sup>  | USA | Cross-sectional       | Explore whether skills acquired by women in career development programs implemented by                                                            | Feb – April, 2011     | 2537 women participants, RR = 35%                | National online self-reported questionnaire.                                                                                                    | <i>Limited population:</i> Loss of follow-up on participants who left academic medicine.                                                                                                 | 9   |

1  
2  
3  
4  
5  
6  
7  
8  
9  
10  
11  
12  
13  
14  
15  
16  
17  
18  
19  
20  
21  
22  
23  
24  
25  
26  
27  
28  
29  
30  
31  
32  
33  
34  
35  
36  
37  
38  
39  
40  
41  
42  
43  
44  
45  
46

|                                    |                               |                 |                                                                                                                                                                                                        |                       |                                                  |                                                                                                                        |                                                                                                                                                                        |     |
|------------------------------------|-------------------------------|-----------------|--------------------------------------------------------------------------------------------------------------------------------------------------------------------------------------------------------|-----------------------|--------------------------------------------------|------------------------------------------------------------------------------------------------------------------------|------------------------------------------------------------------------------------------------------------------------------------------------------------------------|-----|
|                                    |                               |                 | AAMC & Drexel University would vary by career stage & program attended.                                                                                                                                |                       |                                                  |                                                                                                                        |                                                                                                                                                                        |     |
| Hofler et al., 2016 <sup>67^</sup> | USA                           | Cross-sectional | Compare the representation of women in OB/GYNE department-based leadership to leadership in other clinical specialties while accounting for the proportions of women in the residency cohorts of 1990. | Nov-2012 to Oct, 2013 | 851 eligible programs<br><br>105 OB/GYN programs | Accreditation Council for Graduate Medical Education 2012-13 for programs & program websites for leadership positions. | <i>Lack of contextual demographic data:</i> ethnicity, or age.<br><br>Assumption that women choose academic medicine early in their career in equal proportion to men. | 9.5 |
| Kuhlman et al., 2017 <sup>68</sup> | Sweden, Germany, Austria, &UK | Case study      | Explore & compare the representation of women in leadership and management in European academic health centers.                                                                                        | May, 2016             | 4 academic health centers                        | Unspecified                                                                                                            | No methodological deficits were identified.                                                                                                                            | NA  |
| Kværner et al., 1999 <sup>69</sup> | Norway                        | Cross-sectional | Determine the proportion of women leaders to men leaders.                                                                                                                                              | Oct, 1997             | Overall reported 13,844 physician s; 3939 women. | Norwegian Medical Association records.                                                                                 | No methodological deficits were identified.                                                                                                                            | 9.5 |

|                                         |     |                          |                                                                                                                                                                       |           |                                                                                                                                |                                                                                                                                                                                                         |                                                 |     |
|-----------------------------------------|-----|--------------------------|-----------------------------------------------------------------------------------------------------------------------------------------------------------------------|-----------|--------------------------------------------------------------------------------------------------------------------------------|---------------------------------------------------------------------------------------------------------------------------------------------------------------------------------------------------------|-------------------------------------------------|-----|
|                                         |     |                          |                                                                                                                                                                       |           | <i>N</i> in<br>academic<br>medicine<br>334; 94<br>women                                                                        |                                                                                                                                                                                                         |                                                 |     |
| Levine et<br>al.,<br>2015 <sup>70</sup> | USA | Pre/post<br>intervention | Describe &<br>evaluate a<br>longitudinal cohort-<br>based leadership<br>program for women<br>faculty at the Johns<br>Hopkins University<br>School of<br>Medicine.     | 2010-2013 | 134<br>women<br><br>RR<br>cohort 2:<br>80%,<br>58%<br><br>RR<br>cohort 3:<br>86%,<br>76%<br><br>RR<br>cohort 4:<br>92%,<br>69% | Self-reported<br>questionnaire.                                                                                                                                                                         | No follow up on long term<br>effect of program. | 8.5 |
| Long et<br>al., 2011 <sup>72</sup>      | USA | cross-sectional          | Compare the<br>gender distribution<br>of residency<br>program directors<br>with gender<br>distribution of<br>residents & faculty<br>in the 10 largest<br>specialties. | NA        | 601<br>female<br>program<br>directors<br><br>75,156<br>Residents                                                               | Educational issue<br>of JAMA, 2010 for<br>information on the<br>10 largest residency<br>specialties.<br><br>ACGME website<br>for number and<br>program names.<br><br>AAMC for gender<br>distribution of | No methodological deficits<br>were identified.  | 9.5 |



1  
2  
3  
4  
5  
6  
7  
8  
9  
10  
11  
12  
13  
14  
15  
16  
17  
18  
19  
20  
21  
22  
23  
24  
25  
26  
27  
28  
29  
30  
31  
32  
33  
34  
35  
36  
37  
38  
39  
40  
41  
42  
43  
44  
45  
46

|                                     |     |                       |                                                                                                                                                              |           |                                                                       |                                                                                                                                                  |                                                                                                                                                                                                                                                 |      |
|-------------------------------------|-----|-----------------------|--------------------------------------------------------------------------------------------------------------------------------------------------------------|-----------|-----------------------------------------------------------------------|--------------------------------------------------------------------------------------------------------------------------------------------------|-------------------------------------------------------------------------------------------------------------------------------------------------------------------------------------------------------------------------------------------------|------|
|                                     |     |                       |                                                                                                                                                              |           |                                                                       | medical school faculty.                                                                                                                          |                                                                                                                                                                                                                                                 |      |
| Marchant et al., 2007 <sup>15</sup> | USA | Retrospective cohort  | Examine whether the presence of the word "leader" in written tenure criteria may impact the promotion of women in elite medical school differently than men. | 2004      | 24 medical schools                                                    | Carnegie Foundation classification system and the National Institutes of Health (NIH) for medical schools. School's website for tenure criteria. | Limited sample size (24/125), does not account for recruitment or departure of tenured female faculty, or the number of faculty who apply for tenure.<br><br>Wide C.I. (1.02, 35.37)<br>Uncertainty is greater with wider confidence intervals. | 11.5 |
| McDade et al., 2004 <sup>72#</sup>  | USA | Pre/post intervention | Measure the impact of the ELAM program on women academicians' leadership capacities.                                                                         | 1997-2001 | 79 participants<br><br>RRs were nearly 100% (pre) & 69% to 76% (post) | Self-reported questionnaire                                                                                                                      | Only one group, lack of follow-up.                                                                                                                                                                                                              | 11   |
| McLean et al., 2013 <sup>73</sup>   | USA | Retrospective cohort  | Explore whether geographic mobility is associated with career advancement of women in U.S. medical schools who are entering mid- to executive-level          | 2009      | 345 ELAM participants                                                 | ELAM database                                                                                                                                    | Unclear whether Canadian participants were accounted for.                                                                                                                                                                                       | 10.5 |

|                                   |         |                      |                                                                                                                                    |           |                              |                                                                             |                                                                                                                                                                                                                                                |      |
|-----------------------------------|---------|----------------------|------------------------------------------------------------------------------------------------------------------------------------|-----------|------------------------------|-----------------------------------------------------------------------------|------------------------------------------------------------------------------------------------------------------------------------------------------------------------------------------------------------------------------------------------|------|
|                                   |         |                      | positions.                                                                                                                         |           |                              |                                                                             |                                                                                                                                                                                                                                                |      |
| Monroe et al., 2015 <sup>74</sup> | USA     | Cross-sectional      | Delineate leadership positions in the Department of Medicine held by faculty & compare leadership positions held by male & female. | 2012      | 474 faculty, 181 were women. | Division websites &/or Johns Hopkins referral directory, or division heads. | <i>Lack of contextual demographic data:</i> ethnicity, or age.<br><br><i>Lack of contextual career data:</i> career stage, dual leadership appointments or formal leadership training.<br><br>Lack of definition of leadership. Response bias. | 8.5  |
| Pololi et al., 2013 <sup>4</sup>  | USA     | Cross-sectional      | Assess & compare the experiences of women & men faculty of institutional culture including leadership.                             | 2007-2009 | 4578 faculty, RR= 52%        | Online self-reported questionnaire.                                         | No methodological deficits were identified.                                                                                                                                                                                                    | 10.5 |
| Puljak et al., 2008 <sup>75</sup> | Croatia | Retrospective cohort | Determine the extent of women advancing to leadership positions.                                                                   | 1979-2006 | NA                           | University of Split School of Medicine's archives.                          | <i>Lack of contextual demographic data:</i> Ethnicity, marital status, or age.                                                                                                                                                                 | 9.5  |
| Reed et al., 2011 <sup>76</sup>   | USA     | Retrospective cohort | Compare the publication records, academic promotions, & leadership appointments of women and men physicians.                       | 2007      | 25 women<br>50 men           | Mayo clinic faculty database (CVs).                                         | <i>Lack of contextual demographic data:</i> Ethnicity, marital status, or age.                                                                                                                                                                 | 9.5  |

1  
2  
3  
4  
5  
6  
7  
8  
9  
10  
11  
12  
13  
14  
15  
16  
17  
18  
19  
20  
21  
22  
23  
24  
25  
26  
27  
28  
29  
30  
31  
32  
33  
34  
35  
36  
37  
38  
39  
40  
41  
42  
43  
44  
45  
46

|                                    |     |                      |                                                                                                                                                                          |            |                                   |                                                                                                                                                                                        |                                                                     |     |
|------------------------------------|-----|----------------------|--------------------------------------------------------------------------------------------------------------------------------------------------------------------------|------------|-----------------------------------|----------------------------------------------------------------------------------------------------------------------------------------------------------------------------------------|---------------------------------------------------------------------|-----|
| Rotbart et al., 2012 <sup>77</sup> | USA | Retrospective cohort | Determine the extent of gender inequity in a pediatrics department including leadership attainment & to demonstrate an assessment methodology other departments can use. | 2009       | 263 faculty members               | Department databases: The Faculty Information Database Online (FIDO), department Web-based software contains data on faculty members' careers, & PeopleSoft containing salary records. | No methodological deficits were identified.                         | 9.5 |
| Shah et al., 2007 <sup>78</sup>    | USA | Cross-sectional      | Determine if there is any association between the gender of the chairperson/residency program director & the gender of faculty & residents in radiology.                 | Dec, 2006  | 188 programs directors, RR= 45%   | Online self-reported questionnaire.                                                                                                                                                    | Does not account for women self-selecting for leadership positions. | 8   |
| Shah et al., 2010 <sup>79</sup>    | USA | Cross-sectional      | Determine if there is any association between the gender of the chairperson/residency program director & the gender of faculty & residents in ophthalmology.             | July, 2007 | 121 program directors, RR=45.4 5% | Online self-reported questionnaire.                                                                                                                                                    | Only 2 women chairpersons, not large enough to detect association.  | 8   |

|                                                                      |                                     |                         |                       |                                                                                                                                           |                        |                                                                              |                                                                                                                                     |                                                                                                    |      |
|----------------------------------------------------------------------|-------------------------------------|-------------------------|-----------------------|-------------------------------------------------------------------------------------------------------------------------------------------|------------------------|------------------------------------------------------------------------------|-------------------------------------------------------------------------------------------------------------------------------------|----------------------------------------------------------------------------------------------------|------|
| 1<br>2<br>3<br>4<br>5<br>6<br>7<br>8<br>9<br>10<br>11<br>12<br>13    | Spalluto et al., 2017 <sup>80</sup> | USA                     | Pre/post intervention | Describe development & implementation of LIFT-OFF leadership program.                                                                     | June, 2015 – May, 2016 | 39 participants, needs assessment RR = 89.7%<br><br>Questionnaire RR = 76.9% | Self-reported questionnaire.                                                                                                        | Findings limited by lack of longitudinal data on effectiveness of intervention.                    | 10   |
| 14<br>15<br>16<br>17<br>18<br>19<br>20<br>21<br>22<br>23<br>24       | Stadler et al., 2017 <sup>81</sup>  | Singapore, Qatar, & UAE | Cross-sectional       | Describe gender differences of international clinician educators & leaders in emerging international competency-based residency programs. | June 2013-June 2014    | 359 leaders, 69 were women RR = 76.3%                                        | Program websites or through individual researchers who work for each respective institute.                                          | No methodological deficits were identified.                                                        | 10   |
| 25<br>26<br>27<br>28<br>29<br>30<br>31<br>32<br>33<br>34             | Weiss et al., 2014 <sup>54</sup>    | USA                     | Cross-sectional       | Evaluate number of women chairs, program directors, & division chiefs in surgical specialties.                                            | NA                     | 249 programs                                                                 | National Residency Matching Program for programs, AAMC report for resident & faculty, & program websites for information on chairs. | <i>Lack of contextual career data:</i> dual leadership appointments or formal leadership training. | 9.5  |
| 35<br>36<br>37<br>38<br>39<br>40<br>41<br>42<br>43<br>44<br>45<br>46 | White et al., 2012 <sup>82</sup>    | USA                     | Retrospective cohort  | Explore factors that may be involved in the persistent paucity of women leaders in U.S.                                                   | 1980-2006              | 534 Medical school deans                                                     | AAMC faculty roster & Council of Deans database.                                                                                    | <i>Lack of contextual demographic data:</i> Ethnicity, marital status.                             | 10.5 |

1  
2  
3  
4  
5  
6  
7  
8  
9  
10  
11  
12  
13  
14  
15  
16  
17  
18  
19  
20  
21  
22  
23  
24  
25  
26  
27  
28  
29  
30  
31  
32  
33  
34  
35  
36  
37  
38  
39  
40  
41  
42  
43  
44  
45  
46

---

|                                     |     |                 |                                                                                                                                                                             |           |                                 |                                                                                                           |                                                                                                                                                                                                                                                                            |      |
|-------------------------------------|-----|-----------------|-----------------------------------------------------------------------------------------------------------------------------------------------------------------------------|-----------|---------------------------------|-----------------------------------------------------------------------------------------------------------|----------------------------------------------------------------------------------------------------------------------------------------------------------------------------------------------------------------------------------------------------------------------------|------|
|                                     |     |                 | academic medicine & to provide baseline gender-related data for developing strategies to promote gender equity in academic medicine leadership.                             |           |                                 |                                                                                                           |                                                                                                                                                                                                                                                                            |      |
| Willett et al., 2015 <sup>83</sup>  | USA | Cross-sectional | Determine whether salary disparities exist between women & men Internal Medicine residency program directors, & if so, to identify factors associated with the disparities. | Aug, 2012 | 370 program director, RR= 65.1% | Association of Program Directors in Internal Medicine for Programs, & online self-reported questionnaire. | <i>Lack of contextual demographic data:</i> Ethnicity, marital status, or age.<br><br><i>Lack of contextual career data:</i> medical specialty, dual leadership appointments, or formal leadership training.                                                               | 10.5 |
| Woodward et al., 2017 <sup>84</sup> | USA | Cross-sectional | Determine the ratio of women occupying program directors' positions to division chiefs in gastroenterology fellowships, & to evaluate factors associated with this.         | 2015      | 163 gastroenterology programs   | American College of Gastroenterology, AAMC website, & program websites.                                   | <i>Lack of contextual demographic data:</i> Ethnicity, marital status, or age.<br><br><i>Lack of contextual career data:</i> career stage, dual leadership appointments, or formal leadership training.<br><br>Does not differentiate community-based & academic programs. | 9.5  |

---

|                                     |     |                 |                                                         |           |                      |                                                                             |                                                                                                                                                                                          |    |    |    |    |
|-------------------------------------|-----|-----------------|---------------------------------------------------------|-----------|----------------------|-----------------------------------------------------------------------------|------------------------------------------------------------------------------------------------------------------------------------------------------------------------------------------|----|----|----|----|
| 1                                   | 2   | 3               | 4                                                       | 5         | 6                    | 7                                                                           | 8                                                                                                                                                                                        | 9  | 10 | 11 | 12 |
| 13                                  | 14  | 15              | 16                                                      | 17        | 18                   | 19                                                                          | 20                                                                                                                                                                                       | 21 | 22 | 23 | 24 |
| 25                                  | 26  | 27              | 28                                                      | 29        | 30                   | 31                                                                          | 32                                                                                                                                                                                       | 33 | 34 | 35 | 36 |
| 37                                  | 38  | 39              | 40                                                      | 41        | 42                   | 43                                                                          | 44                                                                                                                                                                                       | 45 | 46 |    |    |
| Wright et al., 2003 <sup>85</sup> § | USA | Cross-sectional | Determine reasons for gender disparities in leadership. | 1999-2000 | 418 faculty, RR= 48% | College of Medicine Personnel database, Online self-reported questionnaire. | <i>Lack of contextual demographic data:</i> Ethnicity, marital status, or age.<br><br><i>Lack of contextual career data:</i> dual leadership appointments or formal leadership training. | 7  |    |    |    |

Abbreviations: MERSQI, Medical Education Research Study Quality Instrument; N, Population; RR, response rate; ELAM, Executive Leadership in Academic Medicine; NA, not available.

¶ Studies that report various leadership positions within one specialty (e.g. editorship, society membership), here we report only those which are academic.

§ Studies with a study purpose beyond leadership (e.g. scholarly production).

^ reported in 2 papers Hofler et al., 2016 Hofler et al., 2015

# reported in 2 papers Dannels et al., 2008, Dannels et al., 2009, McDade et al., 2004 also reported in a 2<sup>nd</sup> paper Morahan et al., 2010

#### Supplementary material 4

Quality of studies included using the MERSQI (n=33 excluding the case study)

| <b>Item (max. points)</b>                | <b>Detailed scores</b>                                          | <b>No. (%)</b> |
|------------------------------------------|-----------------------------------------------------------------|----------------|
| <b>Study design (3)</b>                  | Cross-sectional (1)                                             | 19 (58.82)     |
|                                          | Single-group pretest and posttest (1.5)                         | 4 (8.82)       |
|                                          | Non-randomized, 2 groups (including cohort studies) (2)         | 10 (32.35)     |
| <b>Sampling institutions (1.5)</b>       | 1 institution (0.5)                                             | 9 (27.2)       |
|                                          | 3 or more institutions (1.5)                                    | 24 (72.7)      |
| <b>Sampling: response rate (1.5)</b>     | NA                                                              | 17 (51.5)      |
|                                          | <50% or not reported (0.5)                                      | 7 (21.2)       |
|                                          | 50%-74% (1)                                                     | 6 (18)         |
|                                          | > 75% (1.5)                                                     | 3 (9)          |
| <b>Type of data (3)</b>                  | Assessment by study participants (1)                            | 14 (42.4)      |
|                                          | Objective (3)                                                   | 19 (57.6)      |
| <b>Validity evidence (3)</b>             | NA                                                              | 23 (69.7)      |
|                                          | Internal Structure (1)                                          | 5 (15)         |
|                                          | Content (1)                                                     | 8 (24.2)       |
|                                          | Relationship to other variables (1)                             | 2 (6)          |
| <b>Data analysis: sophistication (2)</b> | Descriptive analysis only (1)                                   | 2 (6)          |
|                                          | Beyond descriptive analysis (2)                                 | 31 (93.9)      |
| <b>Data analysis: appropriate (1)</b>    | Data analysis appropriate for study design and type of data (1) | 33 (100)       |
| <b>Outcome (2)</b>                       | Attitudes, perceptions, opinions, general facts (1)             | 29 (88)        |
|                                          | Knowledge, skills (1.5)                                         | 2 (6)          |
|                                          | Behaviors (2)                                                   | 2 (6)          |

# BMJ Open

## Women's leadership in academic medicine: A systematic review of extent, condition, and interventions.

|                                 |                                                                                                                         |
|---------------------------------|-------------------------------------------------------------------------------------------------------------------------|
| Journal:                        | <i>BMJ Open</i>                                                                                                         |
| Manuscript ID                   | bmjopen-2019-032232.R1                                                                                                  |
| Article Type:                   | Original research                                                                                                       |
| Date Submitted by the Author:   | 24-Oct-2019                                                                                                             |
| Complete List of Authors:       | Alwazzan, Lulu; Imam Muhammad Ibn Saud Islamic University, Medical Education<br>Al-Angari, Samiah; King Saud University |
| <b>Primary Subject Heading</b>: | Medical education and training                                                                                          |
| Secondary Subject Heading:      | Medical education and training                                                                                          |
| Keywords:                       | women, leadership, academic medicine, MEDICAL EDUCATION & TRAINING, faculty development                                 |
|                                 |                                                                                                                         |

SCHOLARONE™  
Manuscripts



1  
2  
3  
4  
5  
6  
7  
8 **Women's leadership in academic medicine: A systematic review of extent, condition, and**  
9  
10 **interventions.**

11  
12  
13  
14 Lulu Alwazzan<sup>1</sup> and Samiah S. Al-Angari<sup>2</sup>

15  
16  
17 <sup>1</sup>Department of Medical Education, College of Medicine, Al Imam Mohammad Ibn Saud Islamic  
18  
19 University, Riyadh, Saudi Arabia

20  
21 ORCID ID: <https://orcid.org/0000-0002-8403-8588>

22  
23  
24 <sup>2</sup>Department of Otolaryngology- Head & Neck Surgery, College of Medicine, King Saud  
25  
26 University, Riyadh, Saudi Arabia

27  
28 ORCID ID: <https://orcid.org/0000-0002-8950-0524>

29  
30  
31 \*Correspondence to: Lulu Alwazzan, Department of Medical Education, College of Medicine,  
32  
33 Al Imam Mohammad Ibn Saud Islamic University, 7544 - Othman Bin Affan Rd, Al-Nada  
34  
35 13317-4233, Riyadh, Kingdom of Saudi Arabia; Email: laalwazzan@imamu.edu.sa; Tel:  
36  
37 +966112037111.  
38  
39

40  
41  
42 **Word count:** 5084  
43  
44

45  
46  
47 **Keywords:** Women, leadership, academic medicine, medical education, career progression,  
48  
49 faculty development.  
50  
51

## Abstract

### Objectives

Because culture reflects leadership, the making of diverse and inclusive medical schools begins with diversity amongst leaders. The inclusion of women leaders remains elusive, warranting a systematic exploration of scholarship in this area. We ask: 1) What is the extent of women's leadership in academic medicine? 2) What factors influence women's leadership? 3) What is the impact of leadership development programs?

**Design:** Systematic review

**Data sources:** A systematic search of six online databases (OvidMEDLINE, EMBASE, CINAHL, PsycINFO, the Cochrane Library, and ERIC) from the earliest date available to April 2018 was conducted. Bridging searches were conducted from April 2018 until October 2019.

**Eligibility criteria:** 1) Peer-review; 2) English; 3) quantitative studies (Prospective and retrospective cohort, cross-sectional, and pre-post interventions); evaluating 4) the extent of women's leadership at departmental, college, and graduate program levels; 5) factors influencing women's leadership; 6) leadership development programs. Quantitative studies that explored women's leadership in journal editorial boards and professional societies and qualitative study designs were excluded.

**Data extraction and synthesis:** Two reviewers screened retrieved data of abstracts and full-texts for eligibility, assessment, and extracted study-level data independently. The included studies were objectively appraised using the MERSQI instrument with an inter-rater reliability of ( $\kappa=0.93$ ).

### Results

1  
2  
3 Of 4024 records retrieved, 40 studies met the inclusion criteria. The extent of women's  
4 leadership was determined through gender distribution of leadership positions. Women's  
5 leadership emergence was hindered by institutional requirements such as research productivity  
6 and educational credentials, while women's enactment of leadership was hindered by lack of  
7 policy implementation. Leadership development programs had a positive influence on women's  
8 individual enactment of leadership and on medical schools' cultures.  
9  
10  
11  
12  
13  
14  
15

### 16 **Conclusions**

17  
18  
19 Scholarship on women's leadership inadvertently produced institute-centric rather than women-  
20 centric research. More robust contextualized scholarship is needed to provide practical-  
21 recommendations; drawing on existing conceptual frameworks and utilizing more rigorous  
22 research methods.  
23  
24  
25  
26  
27  
28  
29  
30  
31  
32  
33  
34  
35  
36  
37  
38  
39  
40  
41  
42  
43  
44  
45  
46  
47  
48  
49  
50  
51  
52  
53  
54  
55  
56  
57  
58  
59  
60

### Strengths and limitations of this study

- Unlike other reviews addressing women's careers in academic medicine, this review focuses solely on studies exploring the leadership of women, a central component of gender equity initiatives.
- The systematic approach provided a rigorous framework by which study objectives were set and studies were identified and appraised.
- Exclusion of qualitative literature may limit the conceptual argument of this study.
- Reviewed studies are Western, therefore, findings of this review are not generalizable to non-Western contexts.

## Introduction

Inclusivity and diversity are goals every medical school hopes to achieve for its learners and faculty members.<sup>1-3</sup> An impediment to realizing these goals is the culture of academic medicine, commonly criticized for reinforcing gender and ethnic inequalities.<sup>4-8</sup> By bringing a transformative perspective, women leaders are often thought of as catalysts of organizational culture change, capable of creating better career experiences for the diverse workforce that has come to makeup medical education and practice.<sup>9-11</sup> Despite the recognition, it has been challenging for scholars to study and develop women's leadership. The difficulty, in part, stems from the remaining barriers' cultural nature: traditional models of work,<sup>11</sup> implicit gender bias,<sup>12</sup> limited access to support systems both mentors<sup>9</sup> and sponsors<sup>13</sup>, gender stereotyping,<sup>14</sup> gendered views of leadership,<sup>15</sup> and culture-abiding self-imposed constraints.<sup>16 17</sup>

Such barriers are, of course, not unique to women leaders or to the context of academic medicine. The wealth of literature exploring women's careers, much of it reviewed in 2 systematic reviews,<sup>12 18</sup> 1 narrative review,<sup>19</sup> and 2 overviews<sup>6 20</sup> conclude that broadly, women faculty face the very same hurdles as they join<sup>12</sup> and progress in academic medicine in their roles as physicians<sup>20</sup>, teachers,<sup>18</sup> and researchers.<sup>19</sup> Often, these barriers become reason enough for women to leave academia.<sup>21</sup> Although these reviews, and the studies within them, broaden our understanding of women's experiences, they have treated women's leadership as ancillary to a bigger discourse on career progression, often coming to leadership as one solution to gender inequity. By doing so, these reviews ignore the centrality of leadership in shaping culture and the change needed to realize gender equity. The current systematic review, therefore, aims to address this gap in the research by exclusively reviewing literature on women's leadership in academic medicine.

## Background

In the quest to provide patient-centered care, safe learning environments for trainees, and engaging work environments for faculty, the culture of medical education and practice became an area of much scrutiny.<sup>5 21-24</sup> Hostility, disrespect, abuse, and discrimination are widely documented (e.g. US<sup>21 25-28</sup>, Canada,<sup>29-31</sup>, UK<sup>32-34</sup>) as normalized behaviors. The National Initiative on Gender, Culture, and Leadership in Medicine: C-Change has benchmarked the culture of academic medicine from the perspective of faculty and with special regard to gender equity, both in the US and internationally.<sup>35</sup> As the fulcrum of several studies,<sup>4 5 21 23 24 36-41</sup> C-Change links unhealthy behaviors to culture, and summates that for culture to change, underpinning values need to change first.

But how do values change? According to the organizational literature, cultural values are the values of founding leaders, are adopted by subsequent leaders and members of the culture, and are kept firmly in place by policies and procedures that were developed and implemented over time.<sup>42 43</sup> Although the dynamic interplay between these forces is important, we draw attention to the locus, cultural values are ultimately the values of leaders. In his 2007 speech "Culture and the courage to change",<sup>44</sup> the American Association of Medical Colleges president Kirch spoke to this very point "...This new culture also requires a different kind of leader...search committees will need to look far beyond the weight of a candidate's curriculum vitae, considering factors such as their ability to build alignments, foster trust, and make adaptive changes".<sup>44</sup>

Against the backdrop of need for culture change and a leadership to see it through, we take up women's leadership in academic medicine, often viewed as both savior and victim of culture.<sup>8 22</sup> Such a portrayal illustrates the inevitable role women must play as leaders, especially given their

1  
2  
3 increased numbers,<sup>10</sup> but it also indicates conceptual immaturity. From the emerging conceptual  
4  
5 discourse,<sup>10 17 45-47</sup> we know that scholarship on women's leadership lacks depth, where  
6  
7 leadership emergence is commonly restricted to the pipeline metaphor, while enactment of it  
8  
9 remains grounded in the generic leadership literature.  
10  
11  
12  
13

### 14 *Leadership emergence*

15  
16 How women emerge as leaders is often conceptualized using the pipeline metaphor. The  
17  
18 metaphor suggests that increasing the number of women in male-dominated fields will  
19  
20 eventually lead to an increase in the number of women leaders. According to Magrane and  
21  
22 Morahan<sup>10</sup> the metaphor misses pertinent organizational nuances, namely the implicit gender  
23  
24 bias women face. For example, while men have many role models and a robust support system,  
25  
26 women do not. The metaphor falsely assumes the presence of role models at the end of the  
27  
28 pipeline willing to help women transition to leadership. Given the conceptual limitation, the  
29  
30 authors propose frameworks that recognize the complex organizational systems women must  
31  
32 navigate to emerge as leaders: the leadership continuum<sup>47</sup>, and systems of career influences.<sup>45</sup>  
33  
34  
35 Such frameworks prompt us to ask questions about the emergence of women's leadership. For  
36  
37 example, whether women self-nominate or are appointed to leadership positions in what  
38  
39 Northouse<sup>43</sup> calls *assigned leadership*, how long they hold leadership positions, whether they go  
40  
41 on to hold dual leadership appointments, and if they indeed have mentors or sponsors who  
42  
43 support their careers?  
44  
45  
46  
47  
48  
49  
50

### 51 *Leadership enactment*

52  
53 Much of women's leadership studies remain grounded in the broader leadership literature.<sup>17</sup> As a  
54  
55 result, our conceptualizations of leadership enactment draw on theories developed upon the study  
56  
57  
58  
59  
60

1  
2  
3 of male leaders, making such scholarship inherently male. For example, the older 'great man'  
4 theory exclude women entirely, associating leadership with agentic qualities e.g. authoritative  
5 and assertive, qualities that women supposedly do not possess. Newer collaborative theories e.g.  
6 participatory, distributed, and transformational leadership seem accommodating for women  
7 leaders because of their emphasis on social accountability and collaborative work, however, they  
8 risk trapping women in gender stereotypes, e.g. nurturing, that nominate women for less  
9 prestigious leadership positions e.g. course coordinator.

10  
11  
12 A more nuanced conceptualization of leadership enactment, may offer new insights that would  
13 help us address stereotyping. For example, women may take on informal leadership roles, in  
14 what Northouse<sup>43</sup> calls *emergent leadership*, referring to leadership that develops organically and  
15 is based on building alignments and fostering trust. Moreover, our understanding may be  
16 expanded by exploring the values that inform women's decisions, the behaviors they model, and  
17 the actions they take to improve the quality of medical education and practice whether formally  
18 or informally. Addressing these gaps situates women leaders as critical actors in culture  
19 change.<sup>22 45 47</sup> and begins to conceptually ground women's enactment of leadership in their lived  
20 experiences, rather than the broader generic leadership literature.<sup>17</sup>

21  
22  
23 It is with the wider need for culture change in academic medicine and the more focused need for  
24 conceptual understanding of women's leadership studies in mind that we systematically  
25 reviewed studies on women's leadership in academic medicine. It is our aim to first synthesize  
26 work done in this area. We ask: 1) What is the extent of women's leadership? 2) What factors  
27 influence women's leadership? 3) What is the impact of leadership development programs on



1  
2  
3 women's individual careers and on medical schools' cultures? We concede that our research  
4  
5 questions are broad in scope. We believe it is necessary to cross-cut through these interconnected  
6  
7 areas to meet our second aim, which is to present an analysis of such works in the field and  
8  
9 critique their collective conceptual framework. We concern ourselves, not only with what was  
10  
11 done thus far, but how produced knowledge helps or hinders women's leadership.  
12  
13  
14  
15

## 16 17 **Methods**

### 18 19 *Eligibility Criteria*

20  
21 Search results were independently reviewed against a set of a priori inclusion criteria that  
22  
23 included all peer-reviewed 1) English-language articles; with 2) quantitative methodologies  
24  
25 (Prospective and retrospective cohort, cross-sectional, and pre-post interventions); reporting  
26  
27 studies that evaluated 3) the extent of women's leadership in academic medicine at a  
28  
29 departmental, college, and medical graduate program level; 4) hindering factors to women's  
30  
31 leadership as perceived by women and men faculty members and leaders; 5) studies that  
32  
33 document leadership interventions and their efficacy as reported by women participants of such  
34  
35 programs and their home medical schools. We included a case study because it presented  
36  
37 quantitative descriptive information on women in leadership across non-Western multinational  
38  
39 settings. Although we recognize the interconnection, we excluded quantitative studies that  
40  
41 explored women's leadership in professional societies, journal editorial boards, and journal  
42  
43 editorships, focusing our examination solely on leadership within medical schools and graduate  
44  
45 residency programs. In addition, qualitative study designs were excluded.  
46  
47  
48  
49  
50  
51  
52  
53  
54  
55  
56  
57  
58  
59  
60

### *Information sources*

A primary systematic search was conducted by the first author between April-May 2018 to cover the publication period of earliest date available to April 2018 using the following databases: 1) Ovid MEDLINE (1946-May 2018); 2) EMBASE (1974 - May 2018); 3) CINAHL (1989 -May 2018); 4) Ovid PsycINFO (1967 -April 2018); 5) all EBM Reviews on Ovid-ACP Journal Club, Cochrane Database of Systematic Reviews, Database of Abstracts of Reviews of Effects, and Cochrane Central Register of Controlled Trials (1st quarter); and 6) ERIC (1965 - April 2018). In addition, experts in the field were identified and contacted for published studies not revealed through the databases search. Secondary database searches were performed during the submission process to find additional pertinent material (following the same primary search strategy) to cover the period of April 2018 to the 14<sup>th</sup> of October 2019. The first author followed a systematic and rigorous plan according to best review practices. A librarian's help was not available. Following the PRISMA protocol,<sup>48</sup> she then screened the compiled results, excluding irrelevant articles, and inductively developed a preliminary thematic framework (Figure 1).

### *Search Strategy*

Systematic searches were performed on the selected 6 online bibliographic databases using a combination of key terms including, but not limited to, "women", "female", "females", "girl", "girls", "leadership", "leader", "academic medicine", and "medical education". The keywords were searched for in the "title" and "abstract" search fields. The searches were filtered by applying the inclusion criteria and literature was identified by using keywords and applying Boolean operators 'OR' and 'AND'. Key terms were defined based on the preliminary readings of the literature to ensure the comprehensiveness of our search key terms. For example,

1  
2  
3 “Women”, in our search context included articles with a clear indication that the participants in  
4 the published studies identified as “females”. The literature did not differentiate between sex at  
5 birth and gender identity in women's leadership. As a result, we do not differentiate sex and  
6 gender in this review. An example of a database search strategy is as follows:  
7  
8  
9  
10  
11

12 “MEDLINE search: Ovid  
13

- 14 1. (Women or woman or female or females or girl or girls).mp. [mp=title, abstract, original  
15 title, name of substance word, subject heading word, floating sub-heading word, keyword  
16 heading word, organism supplementary concept word, protocol supplementary concept  
17 word, rare disease supplementary concept word, unique identifier, synonyms]  
18
- 19 2. limit 1 to English language  
20
- 21 3. (Leadership or Leader or leaders or leading).mp. [mp=title, abstract, original title, name  
22 of substance word, subject heading word, floating sub-heading word, keyword heading  
23 word, organism supplementary concept word, protocol supplementary concept word, rare  
24 disease supplementary concept word, unique identifier, synonyms]  
25
- 26 4. limit 3 to English language  
27
- 28 5. (Medical education or academic medicine or health professions education or health  
29 profession education or professional development or faculty development).mp. [mp=title,  
30 abstract, original title, name of substance word, subject heading word, floating sub-  
31 heading word, keyword heading word, organism supplementary concept word, protocol  
32 supplementary concept word, rare disease supplementary concept word, unique identifier,  
33 synonyms]  
34
- 35 6. limit 5 to English language  
36
- 37 7. 2 and 4 and 6”  
38  
39  
40  
41  
42  
43  
44  
45  
46  
47  
48  
49  
50  
51  
52  
53  
54  
55  
56  
57  
58  
59  
60

1  
2  
3 An updated literature search followed the same search strategy for the period of April 2018 to  
4  
5 October 2019.  
6  
7  
8  
9

### 10 *Study selection*

11  
12 Eligibility assessment of the second list of articles titles/abstracts and thematic framework were  
13  
14 independently reviewed by both authors based on the inclusion/exclusion criteria. The full texts  
15  
16 of nominated articles were then retrieved and read carefully for data extraction and further  
17  
18 assessment. At this stage, the bibliographies of nominated articles were reviewed for potential  
19  
20 relevant studies. The two authors discussed their findings and differences were reconciled.  
21  
22  
23  
24  
25

### 26 *Data collection process*

27  
28 An Excel spreadsheet was used to collate extracted data. It contained the following information:  
29  
30

- 31 1. Details on the eligible study: the first author's name and year of publication as the study  
32 ID, title, publication, study period, and country.
- 33 2. Purpose of the study.
- 34 3. Population of interest.
- 35 4. Methodological variables: study design, sample size, response rate if applicable, and use  
36 of validation/reliability measures.
- 37 5. Strengths, weaknesses, and limitations.
- 38  
39  
40  
41  
42  
43  
44  
45  
46  
47  
48

### 49 *Risk of bias assessment*

50  
51 We draw on a strategy suggested by the Best Evidence Medical Education Collaboration,<sup>49 50</sup> to  
52  
53 provide a narrative of the results. Moreover, using the Medical Education Research Quality  
54  
55  
56  
57  
58  
59  
60

1  
2  
3 Study Instrument (MERSQI),<sup>51</sup> we give a score and comment on the strength of individual  
4  
5 studies, assessing their quality in terms of study design, sampling strategy, type of data,  
6  
7 instrument validation, data analysis and outcome measures. The 10-item tool was designed to  
8  
9 evaluate quantitative medical education studies, giving a total possible score of 5 to 18. The  
10  
11 agreement between raters was very good ( $\kappa = 0.93$ ). Where there was disagreement, the authors  
12  
13 resolved their differences by discussion. Furthermore, we point out specific methodological  
14  
15 issues (e.g. lack of contextual demographic or career data, limited population, lack of statistical  
16  
17 adjustments, and lack of follow up) not covered by the MERSQI assessment (see Supplementary  
18  
19 material 1, Methodological limitations).  
20  
21  
22  
23  
24  
25

### 26 *Patient and public involvement*

27  
28 Patients were not directly involved in this systematic review.  
29  
30  
31  
32  
33

## 34 **Results**

### 35 *Overview*

36  
37 The initial database search revealed 4024 citations. Review of the titles and abstracts led to the  
38  
39 retrieval of 93 full-text articles for further assessment. In the secondary review, 6 studies were  
40  
41 identified. Forty two articles met the inclusion criteria and were included in this review (Figure  
42  
43 1), 3 of which were identified through the bibliography search.<sup>52-54</sup> No studies beyond those  
44  
45 identified were revealed by the 17 contacted scholars. Original data were available for 40 studies,  
46  
47 described in 42 articles.<sup>5 15 52-91</sup> See supplementary material 1 for an overview of included  
48  
49  
50  
51  
52  
53  
54  
55  
56  
57  
58  
59  
60 studies.

1  
2  
3 The majority of studies (n=35) were conducted in the United States, 6 included Canadian  
4 respondents,<sup>61 76</sup> information on Canadian programs,<sup>60 77 79</sup> or schools' leadership,<sup>55</sup> 1 study was  
5 conducted across 3 countries (UAE, Qatar, and Singapore),<sup>87</sup> 1 study was conducted across 3  
6 European countries (Sweden, the Netherlands and Austria),<sup>70</sup> 1 study was conducted across 4  
7 European countries (Germany, Sweden, Austria, and the UK),<sup>71</sup> 1 study in Norway,<sup>72</sup> and 1 study  
8 in Croatia.<sup>80</sup> The earliest study was conducted in 1999,<sup>72</sup> and more than 50% of the studies were  
9 published in the past 5 years alone. The design of 9 (26%) studies was retrospective cohort,<sup>15 55 56</sup>  
10 <sup>69 76 80-82 88</sup> 1 (3%) prospective cohort,<sup>58</sup> and 6 (15%) were pre/post interventions.<sup>62 66 73 75 86</sup>  
11  
12 Eleven studies were cross-sectional self-reported questionnaires.<sup>5 61 63 64 68 70 83 84 85 87 89 91</sup> Where  
13 questionnaires were used, the response rates ranged from 22 to 100%. Thirteen studies were  
14 cross-sectional surveys of publicly available or archives of data,<sup>54 57 59 60 65 67 69 72 74 77 78 79 90</sup> and 1  
15 study was a case report.<sup>71</sup>

16  
17  
18  
19  
20  
21  
22  
23  
24  
25  
26  
27  
28  
29  
30  
31  
32  
33 Eighteen articles were published by medical education journals, 13 were published by medical  
34 specialty journals (Internal Medicine = 3, Hospital Medicine =1, Ophthalmology =1,  
35 Obstetrics/Gynecology = 2, Urology = 2, Surgery = 1, Otolaryngology = 1, Roentology =1,  
36 Radiology = 1), 5 articles were published by The Women's Health Journal, 3 by general  
37 medicine journals (British Medical Journal = 1, the Human Resource for Health Journal = 1, and  
38 Cureus =1). Finally, 1 was published by the Journal of Faculty Development.

39  
40  
41  
42  
43  
44  
45  
46  
47  
48  
49 Many of the studies have methodological limitations. Twelve studies used websites and publicly  
50 available data.<sup>15 54-56 59 63 67 69 78 87 90</sup> Six studies did not reveal how their questionnaires were  
51 developed or if they were tested.<sup>63 66 83 84 89 91</sup> Many of the questionnaires were self-reported with  
52  
53  
54  
55  
56  
57  
58  
59  
60

1  
2  
3 modest response rates. The pre/post intervention studies had small number of participants due to  
4  
5 the small number of participants in leadership development programs. Moreover, nearly all  
6  
7 pre/post studies did not present longitudinal findings on the effectiveness of their interventions.  
8  
9

10  
11  
12 Only 8 studies provided contextual demographic (ethnicity or age) and career (career-stage, other  
13  
14 leadership appointments, or leadership training) data on the studied populations.<sup>5 55 59 62 66 70 85 86</sup>

15  
16 The MERSQI scores of all studies ranged from 7 to 12.5 (supplementary material 1 and 2). In  
17  
18 what follows, we present our findings grouped according to 3 theme: the extent of women's  
19  
20 leadership and its emergence, the factors influencing women's leadership emergence and  
21  
22 enactment, and the impact of leadership programs on women's leadership enactment.  
23  
24  
25  
26  
27

### 28 *Extent of women's leadership and its emergence*

29  
30 Twenty five studies reported the extent of women's leadership in academic medicine by  
31  
32 comparing the number of women attaining leadership positions to the number of men.<sup>54-60 63 67 69</sup>  
33  
34  
35 70 72 74 77-84 87 90 91 The studies, however, differed in their approaches and which organizational  
36  
37 positions they chose to highlight (Table 1). Three studies merely described the representation of  
38  
39 women in specialty leadership positions,<sup>57 67</sup> or within a medical school.<sup>80</sup> One study determined  
40  
41 if the proportion of leadership positions in Obstetrics and Gynecology held by women is  
42  
43 consistent with the proportion of women entering residency.<sup>55</sup> Six studies compared the  
44  
45 composition of chairs and/or program directors' gender to faculty members of medical schools,<sup>59</sup>  
46  
47  
48 78 82-84 90 5 studies compared composition of residency program directors to medical residents  
49  
50 composition,<sup>69 74 83 84 90</sup> while 2 studies compared the proportion of residents to department  
51  
52 chairs.<sup>83 84</sup> Two studies compared the number of women in leadership positions in one medical  
53  
54 specialty to other specialties.<sup>56 69</sup>  
55  
56  
57  
58  
59  
60

1  
2  
3  
4  
5 While all studies restricted their study to the gender distribution of leadership positions, 3 studies  
6  
7  
8 <sup>62 74 85</sup> examined leadership emergence (Self-nomination versus appointment, length of time in  
9  
10 position, dual-leadership appointment, and having a mentor/sponsor). For example, Doyle et  
11  
12 al.,<sup>63</sup> found that women were assigned to their positions. The authors also found that women  
13  
14 leaders on average held positions for 5.3 years compared to men leaders who held positions for  
15  
16 9.1 years.  
17  
18  
19  
20

### 21 *Factors influencing women's leadership emergence and enactment*

22 Sixteen articles examined factors associated with leadership gender disparities,<sup>5 15 58 61 63 66 68 70 72</sup>  
23  
24 <sup>73 75 76 81 82 86 88</sup> revealing that women's leadership emergence was challenged by institutional-  
25  
26 level barriers: research productivity requirements, educational requirements, and timing of  
27  
28 academic appointment, and an interpersonal-level barrier: perceived lack of mentorship.  
29  
30 Leadership enactment, on the other hand, was challenged by an institutional-level barrier: poor  
31  
32 gender equality policy development and translation, as well as an interpersonal-level barrier:  
33  
34 gender stereotyping (Table 2).  
35  
36  
37  
38  
39  
40

41 On what hinders women's emergence as leaders, 3 studies investigated research productivity.<sup>58</sup>  
42  
43 <sup>70 81</sup> In 1 study, gender was significantly associated with position through publication activity  
44  
45 ( $\beta = -.08$ , 95%CI =  $-.14$  to  $-.04$ ,  $p = .003$ ). However, in another study, women were almost half as  
46  
47 likely as men (OR, 0.49; 95% CI, 0.35–0.69) to hold leadership positions despite the number of  
48  
49 research publications.<sup>58</sup>  
50  
51  
52  
53  
54  
55  
56  
57  
58  
59  
60



1  
2  
3 White et al.<sup>88</sup> observed notable differences among women and men medical school deans in the  
4 type of advanced degrees (Doctorate in male deans vs. business-related degrees in female deans)  
5 and the rank of the deans' medical school education and training (more men graduating from the  
6 top 50 NIH-ranked schools than women), presenting what seems like a probable association.  
7  
8 Little or lack of mentorship was documented as a hindering factor to women seeking  
9  
10 leadership.<sup>63</sup>  
11  
12  
13  
14  
15  
16  
17  
18

19 On what hinders women's enactment of leadership, 3 studies explored women's leadership  
20 through the perceptions of medical schools deans,<sup>61</sup> faculty within Psychiatry departments,<sup>63</sup> and  
21 faculty at 1 private medical college.<sup>5</sup> For example, Pololi and colleagues<sup>5</sup> reported that women  
22 faculty, in comparison to men, were less likely to perceive their institutions as family-friendly  
23 (T= -4.06,  $p < 0.001$ ), making efforts towards addressing gender diversity (T= -9.70,  $p < 0.001$ ),  
24 and that their personal values were less congruent with institutional values (T= -2.06,  $p < 0.05$ ).  
25  
26 Four studies addressed stereotyping and its effects on women's leadership.<sup>15 63 66 72</sup> Sexism was  
27 reported as a significant barrier to women faculty as they progressed in their careers in  
28  
29 Psychiatry departments ( $p = 0.0001$ ).<sup>63</sup>  
30  
31  
32  
33  
34  
35  
36  
37  
38  
39  
40  
41

42 In a pre/post intervention, Girod et al.<sup>66</sup> investigated the association between implicit gender  
43 biases and leadership positions. The authors found that gender and age were significantly in  
44 favor of men ( $\beta$  male = 0.18,  $p = 0.001$ ;  $\beta$  age = 0.04,  $p = 0.004$ ), suggesting that being an older  
45 male faculty is inherently associated with leadership than with other age and gender  
46  
47 combinations.  
48  
49  
50  
51  
52  
53  
54  
55  
56  
57  
58  
59  
60

### *The impact of women's leadership programs on leadership emergence and enactment*

Seven studies document the impact of women's leadership interventions on individual career satisfaction<sup>62 68 73 75 85 86</sup> and on medical schools' environments.<sup>61</sup> A positive effect of leadership development programs was observed on the values, behaviors, style, and actions women academicians embraced (Table 3). In terms of values, 1 study evaluated leadership programs through the perceptions of medical school deans. In their survey of US and Canadian medical school leadership, Dannels et al.<sup>61</sup> investigated the influence of the Executive Leadership in Academic Medicine (ELAM) program on organizational climate. The authors report that deans had positive perceptions (M = 5.62, SD = 0.961) of the ELAM program and the influence brought to medical schools by its alumnae.<sup>61</sup> The authors also found a significant difference between men and women deans in how they developed leadership in faculty, with women deans reporting more frequent use of practices than did men ( $p = 0.032$ ). These practices included publicly supporting the person when she/he makes a difficult decision, appointing a faculty member to high-level committees or task forces, and nominating faculty to leadership training outside the institution.

In terms of behaviors, styles, and actions, programs improved women's negotiation skills<sup>68 73 75</sup> and provided networking opportunities.<sup>68 73 75 86</sup> Alumnae of leadership programs were more likely to attain leadership positions,<sup>62 86</sup> they were more likely to have knowledge and confidence in leadership skills, and were more likely to have knowledge of organizational structures and processes.<sup>62</sup> Most studies employed a pre/post design to evaluate leadership programs.

## **Discussion**

To our knowledge, this systematic review is the first that synthesizes evidence on women's

1  
2  
3 leadership in academic medicine. The 40 studies address 3 themes: the extent of women's  
4 leadership and its emergence, factors influencing their leadership emergence and enactment, and  
5 the impact of leadership development programs on women's leadership. Deeper analysis  
6 revealed that included studies are levered by imperceptible underpinnings. Oriented by a  
7 positivist paradigm, it seems much of the reviewed literature inadvertently embraced a narrow  
8 understanding of leadership, creating institute-centric rather than women-centric scholarship.  
9 Drawing on the findings of our review, in what follows, we unsettle the conceptual foundation of  
10 the reviewed studies. We argue that women's leadership studies provide a mere  
11 diversity/inclusion performance indicator for institutes that does not necessarily serve women.  
12 We then argue the need to shift to a more nuanced women-centric understanding of leadership.  
13  
14  
15  
16  
17  
18  
19  
20  
21  
22  
23  
24  
25  
26  
27  
28

### 29 *Leadership as organizational position*

30 Our review revealed that in medical schools, women had less access to leadership positions, the  
31 evidence showed fewer than 50% of leadership positions –chairs, program directors, or unit  
32 heads- were occupied by women faculty members (Table 1). Rooted in understanding leadership  
33 as occupancy of an organizational position, in what Northouse<sup>43</sup> calls *assigned leadership*, nearly  
34 60% of the studies' main objective was to document the gender distribution of leadership  
35 positions, and often to correlate this with the number of faculty or residents who are women.  
36 This conceptualization is based upon a positivist understanding of leadership, which ultimately  
37 sees leadership as a quantifiable variable. The rationale for this approach may be that  
38 determining gender ratio in leadership will establish a performance indicator for the institute in  
39 terms of inclusion and diversity i.e. the number of women in leadership reflects gender  
40 equity/inequity. We question the benefit of this reduction to women leaders. Although, we do not  
41 think the two are in conflict, we believe institute-centric thinking neglects the value women  
42  
43  
44  
45  
46  
47  
48  
49  
50  
51  
52  
53  
54  
55  
56  
57  
58  
59  
60

1  
2  
3 leaders bring to leadership and the organizational complexities they must navigate to become  
4  
5 leaders. Leadership is not merely an organizational position for women faculty to occupy.

6  
7 Moreover, the number of women occupying leadership positions at a given point in time, an idea  
8  
9 perpetuated by the pipeline metaphor,<sup>10</sup> does not by itself reflect equity in leadership. Indeed, the  
10  
11 goal is not a critical mass of women who are assigned leaders but “a critical mass of women with  
12  
13 sustained success as leaders”.<sup>47</sup>  
14  
15

16  
17  
18  
19 Most studies that examined gender distribution neglected women's emergence as leaders. It is for  
20  
21 this reason, and drawing on Northouse's<sup>43</sup> work, that we devised a metric (Table 1). Although  
22  
23 not exhaustive, the qualitative metric is an initial attempt to introduce the construct of *leadership*  
24  
25 *emergence* into the discourse on women's leadership in academic medicine. For example, we  
26  
27 found that only 2 studies commented on women being appointed,<sup>63 78</sup> and no studies mentioned  
28  
29 whether women self-nominated. Our intuition is that informal leadership is common amongst  
30  
31 women but whether they self-nominate for formal leadership remains to be seen.  
32  
33  
34  
35  
36  
37

38 Furthermore, even within the parameters of positivist thinking, all studies are methodologically  
39  
40 poor, having a MERSQI range of 7-12.5. Of the 40 studies, 62.5% were cross-sectional. Most  
41  
42 studies used websites (which may be outdated or inaccurate, compromising the validity of the  
43  
44 findings) or self-reported surveys for data. The median response rates where questionnaires were  
45  
46 used was 60% (range, 22%-100%). Many studies failed to explain how their questionnaires were  
47  
48 developed or if they were validated.  
49  
50  
51  
52  
53  
54  
55  
56  
57  
58  
59  
60

### *Leadership as process of influence*

Recognizing the limitation of a positivist paradigm, we suggest a women-centric approach. This understanding aligns with organizational traditions, where leadership is conceptualized as a process of influence between leader and followers;<sup>43 92 93</sup> that is a series of actions and exchanges take place at the interpersonal level for leadership to occur. Here scholars recognize the importance of a leader's capacity for influence and how such influence shapes culture.<sup>42 43 94</sup>

First, to explore capacity for influence, we put women at the heart of inquiry: What are women's leadership capacities; that is their motivations, knowledge, skills, and experiences? Many studies did not mention whether women aspired to leadership. Many studies assumed prior leadership knowledge amongst their respondents, a few mentioned formal leadership training and only 1 documented the role of mentors.<sup>63</sup>

We found instead, that studies focused on what hinders women's leadership at an institutional level such as requirement of research production<sup>58 70 81</sup> and certain educational backgrounds.<sup>88</sup> and at an interpersonal-level e.g. gender bias<sup>66</sup> We believe such study objectives are important. However, they may steer women, who aspire to leadership, towards meeting institutional requirements that are not necessarily crucial to becoming a leader. Indeed, Carr et al.<sup>58</sup> showed that women were almost half as likely as men (OR, 0.49; 95% CI, 0.35–0.69) to hold leadership positions despite the number of research publications. By studying what the institute seemingly requires, studies that focus on hindering factors make scholarship on women's leadership institute-centric.

1  
2  
3 To be women-centric, we grouped hindering factors to the stage of leadership (emergence and  
4 enactment) where we believe such factors manifest (Table 2), then we grouped these studies  
5 according to the perspective each one took, whether institutional, interpersonal, or individual.  
6  
7 Both categorization bring focus to women's capacities for leadership and how they can be best  
8 developed.  
9  
10  
11  
12  
13

14  
15  
16  
17 For example, beyond documenting lack of mentorship,<sup>63</sup> the first categorization prompt us to  
18 consider mentorship according to leadership stage. Do women leaders need mentors to emerge as  
19 leaders or when they are enacting leadership? Such a distinction draws focus to different nuanced  
20 elements. Studying mentoring relationships at an emergence stage may deepen our understanding  
21 of women's motivation or lack thereof for leadership. While studying mentoring relationships at  
22 an enactment stage may deepen our understanding of women's length of service in formal  
23 positions, and the leadership knowledge and skills they gain because of such relationship. This is  
24 especially important because, while we found studies that examined hindering factors on the  
25 institutional level e.g. policy implementation<sup>60</sup> and the interpersonal level e.g. gender bias,<sup>66</sup> we  
26 did not find studies that examined barriers on the individual level e.g. lack of motivation,  
27 knowledge, or skills amongst women.  
28  
29  
30  
31  
32  
33  
34  
35  
36  
37  
38  
39  
40  
41  
42  
43

44  
45 Second, social interactions are the essence of leadership and in time produce culture; the *values*  
46 and *beliefs* that govern our behaviors in organizations.<sup>42</sup> From our review, the current culture, is  
47 shaped by stereotypical beliefs<sup>5 15 60 65</sup> and a lack of gender equality policy development and  
48 implementation.<sup>60</sup> This culture may sometimes feel static and unchanging, but it is recreated and  
49 reinforced in the daily interactions. In the proposed conceptualization, we come to recognize that  
50  
51  
52  
53  
54  
55  
56  
57  
58  
59  
60

1  
2  
3 culture and leadership are two sides of the same coin,<sup>4 41</sup> understanding one requires exploring  
4  
5 the other.  
6  
7  
8  
9

10 Once more we put women at the heart of inquiry: How do women leaders shape culture? From  
11  
12 our review, many studies neglected women's *enactment* of leadership. Many studies did not  
13  
14 mention whether women had informal leadership roles, in what Northouse<sup>43</sup> calls *emergent*  
15  
16 leadership (leadership that develops organically and is based on building alignments and  
17  
18 fostering trust). Many studies did not mention what values informed women's decisions, what  
19  
20 behaviors they modelled, or what actions they took to improve the quality of medical education  
21  
22 and practice whether formally or informally. Many studies did not explore the leadership styles  
23  
24 women embraced.  
25  
26  
27  
28  
29  
30

31 Addressing these gaps situates women leaders as critical actors in culture change.<sup>22 45 47</sup> and  
32  
33 conceptually grounds women's leadership in their lived experiences and not the broader generic  
34  
35 leadership literature.<sup>17</sup> The exception to the rule is studies examining leadership development  
36  
37 programs.<sup>62 68 73 75 85 86</sup> Such programs may be an ideal place to explore women's emergence and  
38  
39 enactment of leadership. We found leadership development program studies paid attention to the  
40  
41 values, behaviors, actions and styles women embraced and enacted (Table 3).  
42  
43  
44  
45  
46

#### 47 *Study limitations*

48 Our study has some limitations. First, we restricted the review to quantitative literature and  
49  
50 argued for studying contextual organizational nuances, which might have been explored in  
51  
52 qualitative studies. Second, we defined leadership as a process of influence between leaders and  
53  
54 followers but have limited our discussion to the leader's perspective. Third, we found that all  
55  
56  
57  
58  
59  
60

1  
2  
3 studies except one<sup>87</sup> were conducted in North America and Europe. As a result, the presented  
4  
5 evidence may not reflect non-Western contexts, but we have forgone discussion of this finding.  
6  
7 Addressing these limitations requires more space and further research which we hope to embark  
8  
9 on and invite others to do so.  
10  
11  
12  
13

## 14 **Conclusion**

15 After reviewing the quantitative literature on women's leadership, we recognize the need for  
16  
17 broader conceptual foundations. We also recognize that in problematizing the current conceptual  
18  
19 foundation, we join other scholars<sup>5 17 22 47 53</sup> in arguing for more innovative research questions  
20  
21 and rigorous methods. Our argument for broadening the conceptual foundation is two-fold. First,  
22  
23 by focusing on women's experiences, we can offer readership of this field, who we assume are  
24  
25 largely women faculty, practical knowledge that can help them pursue their own leadership.  
26  
27 Second, leadership and culture are inextricably linked.<sup>47</sup> Consequently, the culture change we  
28  
29 aspire to in academic medicine cannot happen without a deeper understanding of this  
30  
31 relationship.  
32  
33  
34  
35  
36  
37  
38  
39  
40  
41  
42  
43  
44  
45  
46  
47  
48  
49  
50  
51  
52  
53  
54  
55  
56  
57  
58  
59  
60



1  
2  
3 **Contributors:** Lulu is responsible for the study's conception, design, and conceptual argument.  
4  
5 She and Samiah collected, analyzed, interpreted, and discussed the data. Both Lulu and Samiah  
6  
7 wrote the manuscript.  
8  
9

10 **Funding/Support:** This research received no specific grant from any funding agency in the  
11  
12 public, commercial or not-for-profit sectors.  
13

14 **Competing interests:** None declared.  
15

16 **Patient consent for publication:** Not required.  
17

18 **Other disclosures:** None  
19  
20

21 **Ethical approval:** Not applicable  
22  
23

24 **Data sharing statement:** The data from the current study may be requested from the  
25  
26 corresponding author.  
27  
28  
29  
30  
31  
32  
33  
34  
35  
36  
37  
38  
39  
40  
41  
42  
43  
44  
45  
46  
47  
48  
49  
50  
51  
52  
53  
54  
55  
56  
57  
58  
59  
60

## References

1. AAMC. Diversity in Medical Education.  
<https://www.aamcdiversityfactsandfigures2016.org>. Published 2016. Accessed June 13, 2018.
2. Dogra N. The development and evaluation of a programme to teach cultural diversity to medical undergraduate students. *Med Educ* 2001;**35**:232-41.
3. Tsouroufli M, Malcolm I. Equality, diversity and fairness in medical education: international perspectives. *Med Educ* 2015;**49**:4-6.
4. Pololi LH. Changing the culture of academic medicine: perspectives of women faculty. Lebanon, NH: UPNE, 2010.
5. Pololi LH, Civian JT, Brennan RT, Dottolo AL, Krupat E. Experiencing the culture of academic medicine: gender matters, a national study. *J Gen Intern Med* 2013;**28**:201-7.
6. Reed V, Buddeberg-Fischer B. Career obstacles for women in medicine: an overview. *Med Educ* 2001;**35**:139-47.
7. Risberg G, Johansson EE, Hamberg K. 'Important... but of low status': male education leaders' views on gender in medicine. *Med Educ* 2011;**45**:613-24.
8. Valentine H, Sandborg CI. Changing the culture of academic medicine to eliminate the gender leadership gap: 50/50 by 2020. *Acad Med* 2013;**88**:1411-3.
9. Bickel J, Wara D, Atkinson BF, et al. Increasing women's leadership in academic medicine: report of the AAMC Project Implementation Committee. *Acad Med* 2002;**77**:1043-61.

10. Magrane D, Morahan PS. Fortifying the Pipeline to Leadership: The International Center for Executive Leadership in Academics at Drexel. In: Rachelle S. Heller CM, Paul Sali Sabila, eds. *Forward to Professorship in STEM: Inclusive faculty development strategies that work*. San Diego, CA: Academic Press, 2016:319-336.
11. Morahan P, Bickel J. Capitalizing on women's intellectual capital in the professions. *Acad Med* 2002;**77**:110-2.
12. Isaac C, Lee B, Carnes M. Interventions that affect gender bias in hiring: a systematic review. *Acad Med* 2009;**84**:1440-6.
13. Travis EL, Doty L, Helitzer DL. Sponsorship: a path to the academic medicine C-suite for women faculty? *Acad Med* 2013;**88**:1414-17.
14. Burgess DJ, Joseph A, van Ryn M, Carnes M. Does stereotype threat affect women in academic medicine? *Acad Med* 2012;**87**:506-12.
15. Marchant A, Bhattacharya A, Carnes M. Can the Language of Tenure Criteria Influence Women's Academic Advancement? *J Womens Health* 2007;**16**:998-1003.
16. Alwazzan L, Rees CE. Women in medical education: views and experiences from the Kingdom of Saudi Arabia. *Med Educ* 2016;**50**:852-865.
17. McKimm J, Da Silva AS, Edwards S, Greenhill J, Taylor C. Women and Leadership in Medicine and Medical Education: International Perspectives. In: *International Perspectives on Equality, Diversity and Inclusion*. Vol 2. London: Emerald Group Publishing Limited, 2015:69-98.
18. Laver KE, Prichard IJ, Cations M, Osenk I, Govin K, Coveney JD. A systematic review of interventions to support the careers of women in academic medicine and other disciplines. *BMJ open* 2018;**8**:e020380.

19. Edmunds LD, Ovseiko PV, Shepperd S, et al. Why do women choose or reject careers in academic medicine? A narrative review of empirical evidence. *Lancet* 2016;**388**:2948-2958.
20. Penny M, Jeffries R, Grant J, Davies SC. Women and academic medicine: a review of the evidence on female representation. *JRSM Open* 2014;**107**:259-63.
21. Pololi LH, Krupat E, Civian JT, Ash AS, Brennan RT. Why are a quarter of faculty considering leaving academic medicine? A study of their perceptions of institutional culture and intentions to leave at 26 representative U.S. medical schools. *Acad Med* 2012;**87**:859-69.
22. Helitzer DL, Newbill SL, Cardinali G, Morahan PS, Chang S, Magrane D. Changing the Culture of Academic Medicine: Critical Mass or Critical Actors? *J Womens Health* 2017;**26**:540-8.
23. Pololi LH, Jones SJ. Women faculty :an analysis of their experiences in academic medicine and their coping strategies. *Gend Med* 2010;**7**:438-50.
24. Pololi L, Kern DE, Carr P, Conrad P, Knight S. The culture of academic medicine: faculty perceptions of the lack of alignment between individual and institutional values. *J Gen Intern Med* 2009;**24**:1289-95.
25. Cook AF, Arora VM, Rasinski KA, Curlin FA, Yoon JD. The prevalence of medical student mistreatment and its association with burnout. *Acad Med* 2014;**89**:749-54.
26. Frank E, Carrera JS, Stratton T, Bickel J, Nora LM. Experiences of belittlement and harassment and their correlates among medical students in the United States: longitudinal survey. *BMJ* 2006;**333**:682.

- 1  
2  
3 27. Komaromy M, Bindman AB, Haber RJ, Sande MA. Sexual harassment in medical  
4 training. *NEJM* 1993;**328**:322-326.  
5  
6  
7 28. Kwok S, Ostermeyer B, Coverdale J. A systematic review of the prevalence of patient  
8 assaults against residents. *J Grad Med Educ* 2012;**4**:296-300.  
9  
10  
11 29. Chaimowitz GA, Moscovitch A. Patient assaults on psychiatric residents: the  
12 Canadian experience. *Can J Psychiatry* 1991;**36**:107-11.  
13  
14  
15 30. Cohen JS, Leung Y, Fahey M, et al. The happy docs study: a Canadian Association of  
16  
17 Internes and Residents well-being survey examining resident physician health and  
18  
19 satisfaction within and outside of residency training in Canada. *BMC Res Notes*  
20  
21 2008;**1**:105.  
22  
23  
24 31. Cohen JS, Patten S. Well-being in residency training: a survey examining resident  
25  
26 physician satisfaction both within and outside of residency training and mental health  
27  
28 in Alberta. *BMC Med Educ* 2005;**5**:21.  
29  
30  
31 32. Hoosen IA, Callaghan R. A survey of workplace bullying of psychiatric trainees in  
32  
33 the West Midlands. *Psychiatr Bull* 2004;**28**:225-7.  
34  
35  
36 33. Keeley PW, Waterhouse ET, Noble SI. Prevalence and characteristics of bullying of  
37  
38 trainees in palliative medicine. *Palliat Med* 2005;**19**:84-5.  
39  
40  
41 34. Nicolson P, Welsh CL. Sexual harassment, male dominated organizations and the role  
42  
43 of counselling psychology: The case of medical school. *Couns Psychol Q*  
44  
45 1993;**6**:291-301.  
46  
47  
48 35. National Initiative on Gender, Culture and Leadership in Medicine: C-Change.  
49  
50 <http://cchange.brandeis.edu>. Accessed February 27, 2019.  
51  
52  
53  
54  
55  
56  
57  
58  
59  
60

- 1  
2  
3 36. Conrad P, Carr P, Knight S, Renfrew MR, Dunn MB, Pololi L. Hierarchy as a barrier  
4 to advancement for women in academic medicine. *J Womens Health* 2010;**19**:799-  
5  
6 805.  
7  
8  
9  
10 37. Pololi L, Cooper LA, Carr P. Race, Disadvantage and Faculty Experiences in  
11  
12 Academic Medicine. *J Gen Intern Med* 2010;**25**:1363-9.  
13  
14 38. Pololi L, Conrad P, Knight S, Carr P. A study of the relational aspects of the culture  
15 of academic medicine. *Acad Med* 2009;**84**:106-14.  
16  
17  
18 39. Pololi LH, Evans AT, Civian JT, et al. Faculty Vitality-Surviving the Challenges  
19 Facing Academic Health Centers: A National Survey of Medical Faculty. *Acad Med*  
20  
21 2015;**90**:930-6.  
22  
23  
24 40. Pololi LH, Evans AT. Group Peer Mentoring: An Answer to the Faculty Mentoring  
25 Problem? A Successful Program at a Large Academic Department of Medicine. *J*  
26  
27  
28  
29  
30  
31  
32  
33 41. Pololi LH, Krupat E, Schnell ER, Kern DE. Preparing culture change agents for  
34 academic medicine in a multi-institutional consortium: the C - change learning action  
35 network. *J Contin Educ Health Prof* 2013;**33**:244-57.  
36  
37  
38  
39 42. Schein EH. Organizational Culture and Leadership, 5th ed. Hoboken, NJ: Wiley,  
40  
41 2016.  
42  
43  
44 43. Northouse PG. Leadership: Theory and Practice, 7th ed. Thousand Oak, CA: Sage  
45 Publications, 2016.  
46  
47  
48 44. Kirch DG. Presidential Address to AAMC 2007: Culture and the courage to change.  
49  
50  
51  
52  
53  
54  
55  
56  
57  
58  
59  
60

- 1  
2  
3 45. Magrane D, Helitzer D, Morahan P, et al. Systems of career influences: a conceptual  
4 model for evaluating the professional development of women in academic medicine.  
5  
6  
7  
8 *J Womens Health* 2012;**21**:1244-51.  
9
- 10 46. McKimm J, Wong J, Wright R, H OS. Developing clinical leadership capacity among  
11 UK foundation trainees. *Br J Hosp Med (Lond)* 2011;**72**:406-9.  
12  
13
- 14 47. Morahan PS, Rosen SE, Richman RC, Gleason KA. The leadership continuum: a  
15 framework for organizational and individual assessment relative to the advancement  
16 of women physicians and scientists. *J Womens Health* 2011;**20**:387-96.  
17  
18
- 19 48. Moher D, Liberati A, Tetzlaff J, Altman DG. Preferred reporting items for systematic  
20 reviews and meta-analyses: the PRISMA statement. *PLoS Med* 2009;**6**:e1000097.  
21  
22
- 23 49. Haig A, Dozier M. BEME Guide no 3: systematic searching for evidence in medical  
24 education--Part 1: Sources of information. *Med Teach* 2003;**25**:352-63.  
25  
26
- 27 50. Haig A, Dozier M. BEME Guide No. 3: Systematic searching for evidence in medical  
28 education--Part 2: Constructing searches. *Med Teach* 2003;**25**:463-84.  
29  
30
- 31 51. Reed DA, Cook DA, Beckman TJ, Levine RB, Kern DE, Wright SM. Association  
32 between funding and quality of published medical education research. *JAMA*  
33 2007;**298**:1002-9.  
34  
35
- 36 52. Hofler L, Hacker MR, Dodge LE, Ricciotti HA. Subspecialty and gender of obstetrics  
37 and gynecology faculty in department-based leadership roles. *Obstet Gynecol*  
38 2015;**125**:471-6.  
39  
40
- 41 53. Morahan PS, Gleason KA, Richman RC, Dannels S, McDade SA. Advancing Women  
42 Faculty to Senior Leadership in US Academic Health Centers: Fifteen Years of  
43 History in the Making. *J Women High Educ* 2010;**3**:140-65.  
44  
45  
46  
47  
48  
49  
50  
51  
52  
53  
54  
55  
56  
57  
58  
59  
60

- 1  
2  
3 54. Weiss A, Lee KC, Tapia V, et al. Equity in surgical leadership for women: more work  
4 to do. *Am J Surg* 2014;**208**:494-8.  
5  
6  
7  
8 55. Baecher-Lind L. Women in leadership positions within obstetrics and gynecology:  
9 does the past explain the present? *Obstet Gynecol* 2012;**120**:1415-8.  
10  
11  
12 56. Burden M, Frank MG, Keniston A, et al. Gender disparities in leadership and  
13 scholarly productivity of academic hospitalists. *J Hosp Med* 2015;**10**:481-5.  
14  
15  
16 57. Cancian M, Aguiar L, Thavaseelan S. The Representation of Women in Urological  
17 Leadership. *Urol Pract* 2018;**5**:228-232.  
18  
19  
20 58. Carr PL, Raj A, Kaplan SE, Terrin N, Breeze JL, Freund KM. Gender Differences in  
21 Academic Medicine: Retention, Rank, and Leadership Comparisons From the  
22 National Faculty Survey. *Acad Med* 2018;**93**:1694-9.  
23  
24  
25 59. Cheng D, Promes S, Clem K, Shah A, Pietrobon R. Chairperson and faculty gender in  
26 academic emergency medicine departments. *Acad Emerg Med* 2006;**13**:904-6.  
27  
28  
29 60. Dannels S, McLaughlin J, Gleason KA, McDade SA, Richman R, Morahan PS.  
30 Medical school deans' perceptions of organizational climate: useful indicators for  
31 advancement of women faculty and evaluation of a leadership program's impact.  
32 *Acad Med* 2009;**84**:67-79.  
33  
34  
35 61. Counter WB, Khurshid K, Jala S, Castillo M. Whitee AM, Otero HJ, Nicolaou S,  
36 Khosa F. Gender differences among academic paediatrics radiology faculty in the  
37 United States and Canada. [published online ahead of print, 29 July 2019]. *Acad*  
38 *Radiol*. doi: 10.1016/j.acra.2019.06.011.  
39  
40  
41  
42  
43  
44  
45  
46  
47  
48  
49  
50  
51  
52  
53  
54  
55  
56  
57  
58  
59  
60



- 1  
2  
3 62. Dannels SA, Yamagata H, McDade SA, et al. Evaluating a leadership program: a  
4 comparative, longitudinal study to assess the impact of the Executive Leadership in  
5 Academic Medicine (ELAM) Program for Women. *Acad Med* 2008;**83**:488-95.  
6  
7  
8  
9  
10 63. Doyle M, Pederson A, Meltzer-Brody S. Demographic and Personal Characteristics  
11 of Male and Female Chairs in Academic Psychiatry. *Acad Psychiatry* 2016;**40**:402-9.  
12  
13  
14 64. Ellinas EH, Fouad N, Byars-Winston A. Women and the Decision to Leave, Linger,  
15 or Lean In: Predictors of Intent to Leave and Aspirations to Leadership and  
16 Advancement in Academic Medicine. *J Womens Health* 2018;**27**:324-32.  
17  
18  
19 65. Epperson M, Gouveia CJ, Tabangin ME, Taker V, Howell R, Altar M, Ishman SL,  
20 Tang AL. Female representation in otolaryngology leadership roles. [Published online  
21 ahead of print, 18, September 2019]. *The laryngoscope*. doi:  
22 <https://doi.org/10.1002/lary.28308>.  
23  
24  
25  
26  
27  
28  
29  
30 66. Girod S, Fassiotto M, Grewal D, et al. Reducing Implicit Gender Leadership Bias in  
31 Academic Medicine With an Educational Intervention. *Acad Med* 2016;**91**:1143-50.  
32  
33  
34 67. Han J, Stillings S, Hamann H, Terry R, Moy L. Gender and Subspecialty of Urology  
35 Faculty in Department-based Leadership Roles. *Urology* 2017;**110**:36-39.  
36  
37  
38  
39 68. Helitzer DL, Newbill SL, Morahan PS, et al. Perceptions of skill development of  
40 participants in three national career development programs for women faculty in  
41 academic medicine. *Acad Med* 2014;**89**:896-903.  
42  
43  
44  
45  
46 69. Hofler LG, Hacker MR, Dodge LE, Schutzberg R, Ricciotti HA. Comparison of  
47 Women in Department Leadership in Obstetrics and Gynecology With Those in  
48 Other Specialties. *Obstet Gynecol* 2016;**127**:442-44.  
49  
50  
51  
52  
53 70. Komlenac N, Senden, MG, Verdonk P, Hochleitner M, Silver H. Parenthood does not  
54  
55  
56  
57  
58  
59  
60

- 1  
2  
3 explain the gender difference in clinical position in academic medicine among  
4 Swedish, Dutch and Austrian physicians. *Adv Health Sci Educ Theory Pract*  
5  
6 2019;**24**:539-557.  
7  
8  
9
- 10 71. Kuhlmann E, Ovseiko PV, Kurmeyer C, et al. Closing the gender leadership gap: a  
11 multi-centre cross-country comparison of women in management and leadership in  
12 academic health centres in the European Union. *Hum Resour Health* 2017;**15**:2.  
13  
14  
15  
16
- 17 72. Kvaerner KJ, Aasland OG, Botten GS. Female medical leadership: cross sectional  
18 study. *BMJ* 1999;**318**:91-94.  
19  
20  
21
- 22 73. Levine RB, Gonzalez-Fernandez M, Bodurtha J, Skarupski KA, Fivush B.  
23 Implementation and evaluation of the Johns Hopkins University School of Medicine  
24 leadership program for women faculty. *J Womens Health* 2015;**24**:360-366.  
25  
26  
27
- 28 74. Long TR, Elliott BA, Warner ME, Brown MJ, Rose SH. Resident and program  
29 director gender distribution by specialty. *J Womens Health* 2011;**20**:1867-1870.  
30  
31  
32
- 33 75. McDade SA, Richman RC, Jackson GB, Morahan PS. Effects of participation in the  
34 Executive Leadership in Academic Medicine (ELAM) program on women faculty's  
35 perceived leadership capabilities. *Acad Med* 2004;**79**:302-309.  
36  
37  
38
- 39 76. McLean MR, Morahan PS, Dannels SA, McDade SA. Geographic mobility advances  
40 careers: study of the Executive Leadership in Academic Medicine (ELAM) program  
41 for women. *Acad Med* 2013;**88**:1700-1706.  
42  
43  
44
- 45 77. Moghimi S, Khushid K, Jalal S, Qamar SR, Nicolaou S, Fatima K, Khosa F. Gender  
46 differences in leadership positions among academic Nuclear Medicine specialists in  
47 Canada and the United States. *Am. J. Roentgenol* 2019;**212**: 146-150.  
48  
49  
50  
51  
52  
53  
54  
55  
56  
57  
58  
59

- 1  
2  
3  
4  
5  
6  
7  
8  
9  
10  
11  
12  
13  
14  
15  
16  
17  
18  
19  
20  
21  
22  
23  
24  
25  
26  
27  
28  
29  
30  
31  
32  
33  
34  
35  
36  
37  
38  
39  
40  
41  
42  
43  
44  
45  
46  
47  
48  
49  
50  
51  
52  
53  
54  
55  
56  
57  
58  
59  
60
78. Monroe AK, Levine RB, Clark JM, Bickel J, MacDonald SM, Resar LM. Through a Gender Lens: A View of Gender and Leadership Positions in a Department of Medicine. *J Womens Health* 2015;**24**:837-842.
79. Odell T, Toor H, Takayanagi A, et al. Gender Disparity in Academic Neurosurgery. *Cureus*; **11**:e4628. DOI 10.7759/cureus.4628
80. Puljak L, Kojundzic SL, Sapunar D. Gender and academic medicine: a good pipeline of women graduates is not advancing. *Teach Learn Med* 2008;**20**:273-278.
81. Reed DA, Enders F, Lindor R, McClees M, Lindor KD. Gender differences in academic productivity and leadership appointments of physicians throughout academic careers. *Acad Med* 2011;**86**:43-7.
82. Rotbart HA, McMillen D, Taussig H, Daniels SR. Assessing gender equity in a large academic department of pediatrics. *Acad Med* 2012;**87**:98-104.
83. Shah A, Braga L, Braga-Baiak A, Jacobs DO, Pietrobon R. The association of departmental leadership gender with that of faculty and residents in radiology. *Acad Radiol* 2007;**14**:998-1003.
84. Shah DN, Volpe NJ, Abbuhl SB, Pietrobon R, Shah A. Gender characteristics among academic ophthalmology leadership, faculty, and residents: results from a cross-sectional survey. *Ophthalmic Epidemiol* 2010;**17**:1-6.
85. Skarupski KA, Levine RB, Rand C, Gonzalez-Fernandez M, Clements JE, Fivush B. Impact of a leadership program for women faculty: A retrospective survey of eight years of cohort participants. *J Fac dev* 2019;**33**:7-14.

- 1  
2  
3 86. Spalluto LB, Spottswood SE, Deitte LA, Chern A, Dewey CM. A Leadership  
4 Intervention to Further the Training of Female Faculty (LIFT-OFF) in Radiology.  
5  
6 *Acad Radiol* 2017;**24**:709-716.  
7  
8  
9  
10 87. Stadler DJ, Archuleta S, Ibrahim H, Shah NG, Al-Mohammed AA, Cofrancesco J, Jr.  
11 Gender and international clinician educators. *Postgrad Med J* 2017;**93**:719-724.  
12  
13  
14 88. White FS, McDade S, Yamagata H, Morahan PS. Gender-related differences in the  
15 pathway to and characteristics of U.S. medical school deanships. *Acad Med*  
16  
17 2012;**87**:1015-1023.  
18  
19  
20  
21 89. Willett LL, Halvorsen AJ, McDonald FS, Chaudhry SI, Arora VM. Gender  
22 differences in salary of internal medicine residency directors: a national survey. *Am J*  
23  
24 *Med* 2015;**128**:659-65.  
25  
26  
27  
28 90. Woodward Z, Rodriguez Z, Jou JH, et al. Gender disparities in gastroenterology  
29 fellowship director positions in the United States. *Gastrointest Endosc* 2017;**86**:595-  
30  
31 599.  
32  
33  
34  
35 91. Wright AL, Schwindt LA, Bassford TL, et al. Gender differences in academic  
36 advancement: patterns, causes, and potential solutions in one US College of  
37  
38 Medicine. *Acad Med* 2003;**78**:500-508.  
39  
40  
41  
42 92. Bass BM, Bass R. The Bass Handbook of Leadership: Theory, Research, and  
43  
44 Managerial Applications, 4th ed. New York, NY: Free Press, 2008.  
45  
46  
47 93. Tannenbaum R, Weschler IR, Massarik F. Leadership and Organization: A  
48  
49 Behavioral Science Approach. Whitefish, MT: Literary Licensing, LLC, 2012.  
50  
51  
52 94. Schein EH. Humble Inquiry: The Gentle Art of Asking Instead of Telling, 1st ed. San  
53  
54 Francisco, CA: Berrett-Koehler Publishers, 2013.  
55  
56  
57  
58  
59  
60

1  
2  
3 **Figure legends:**  
4

5 **Figure 1:** Flowchart of search strategy using PRISMA protocol.  
6

7  
8 **Table 1:** The extent of women's leadership and its emergence in academic medicine.  
9

10 **Table 2:** Thematic analysis of the 15 quantitative articles that examined the hindering factors  
11 associated with women's leadership emergence and enactment.  
12  
13

14 **Table 3:** Women's leadership programs in academic medicine and their influence on leadership  
15 enactment  
16  
17  
18  
19  
20  
21  
22  
23  
24  
25  
26  
27  
28  
29  
30  
31  
32  
33  
34  
35  
36  
37  
38  
39  
40  
41  
42  
43  
44  
45  
46  
47  
48  
49  
50  
51  
52  
53  
54  
55  
56  
57  
58  
59  
60

**Table 1****The extent of women's leadership and its emergence in academic medicine**

| Source                                                    | Population/Setting                                                                                                                    | Outcome                         | Examination of leadership emergence      |                                  |                                 |                |
|-----------------------------------------------------------|---------------------------------------------------------------------------------------------------------------------------------------|---------------------------------|------------------------------------------|----------------------------------|---------------------------------|----------------|
|                                                           |                                                                                                                                       |                                 | Self-nomination<br>versus<br>appointment | Length of<br>holding<br>position | Dual<br>position<br>appointment | Mentor/sponsor |
| <b>Women in leadership positions within one-specialty</b> |                                                                                                                                       |                                 |                                          |                                  |                                 |                |
| Baecher-<br>Lind 2012 <sup>55</sup>                       | Obstetrics &<br>gynecology<br>departments<br>associated with the<br>council of<br>University Chairs<br>of Obstetrics &<br>Gynecology. | 20% of DCs<br>( $p < 0.001$ )   | None                                     | None                             | None                            | None           |
| Cancian et<br>al. 2017 <sup>57</sup>                      | US Urology<br>leadership<br>programs.                                                                                                 | 1.6% of DCs, & 11.2% of<br>RPDs | None                                     | None                             | None                            | None           |

|    |                    |                    |                               |              |              |             |
|----|--------------------|--------------------|-------------------------------|--------------|--------------|-------------|
| 1  |                    |                    |                               |              |              |             |
| 2  |                    |                    |                               |              |              |             |
| 3  | Cheng et al.       | US Emergency       | 7.5% of DCs & 15% of          | None         | None         | None        |
| 4  |                    | departments.       | PDs.                          |              |              | None        |
| 5  | 2006 <sup>59</sup> |                    | Departments chaired by        |              |              |             |
| 6  |                    |                    | women had significantly       |              |              |             |
| 7  |                    |                    | higher percentage of          |              |              |             |
| 8  |                    |                    | women faculty ( $p = 0.01$ ). |              |              |             |
| 9  |                    |                    | Departments chaired by        |              |              |             |
| 10 |                    |                    | women were more likely        |              |              |             |
| 11 |                    |                    | to have women PDs ( $p <$     |              |              |             |
| 12 |                    |                    | .01)                          |              |              |             |
| 13 |                    |                    |                               |              |              |             |
| 14 |                    |                    |                               |              |              |             |
| 15 |                    |                    |                               |              |              |             |
| 16 |                    |                    |                               |              |              |             |
| 17 |                    |                    |                               |              |              |             |
| 18 |                    |                    |                               |              |              |             |
| 19 |                    |                    |                               |              |              |             |
| 20 | Counter et al.     | US faculty in      | 56.8% of director, chair,     | None         | None         | None        |
| 21 | 2019 <sup>60</sup> | academic Pediatric | division head/chief           |              |              | None        |
| 22 |                    | Radiology          | 66.7% vice chair,             |              |              |             |
| 23 |                    |                    | assistant/associate           |              |              |             |
| 24 |                    |                    | director                      |              |              |             |
| 25 |                    |                    |                               |              |              |             |
| 26 |                    |                    |                               |              |              |             |
| 27 |                    |                    |                               |              |              |             |
| 28 |                    |                    |                               |              |              |             |
| 29 | Doyle et al.       | US Psychiatry      | 10% of chairs were            | Women        | Women        | None        |
| 30 | 2016 <sup>63</sup> | chairs             | women                         | leaders were | leaders on   | Women leads |
| 31 |                    |                    | Male chairs were more         | appointed.   | average held | had mentors |
| 32 |                    |                    | likely than female chairs     |              | position for |             |
| 33 |                    |                    | to head large departments     |              | 5.3 years,   |             |
| 34 |                    |                    | ( $p = 0.02$ , 95% CI -17.1-  |              | compared to  |             |
| 35 |                    |                    | 69.1).                        |              | men leaders  |             |
| 36 |                    |                    |                               |              |              |             |
| 37 |                    |                    |                               |              |              |             |
| 38 |                    |                    |                               |              |              |             |
| 39 |                    |                    |                               |              |              |             |
| 40 |                    |                    |                               |              |              |             |
| 41 |                    |                    |                               |              |              |             |
| 42 |                    |                    |                               |              |              |             |
| 43 |                    |                    |                               |              |              |             |
| 44 |                    |                    |                               |              |              |             |
| 45 |                    |                    |                               |              |              |             |
| 46 |                    |                    |                               |              |              |             |
| 47 |                    |                    |                               |              |              |             |

|                                    |                                                     |                                                                                                                                                                                                                                |      | who held<br>positions for<br>9.1 |      |      |      |
|------------------------------------|-----------------------------------------------------|--------------------------------------------------------------------------------------------------------------------------------------------------------------------------------------------------------------------------------|------|----------------------------------|------|------|------|
| Epperson et al. 2019 <sup>65</sup> | US Otolaryngology residency and fellowship programs | 18.6% of residency and fellowship directors<br>5.1% of chairs                                                                                                                                                                  | None | None                             | None | None | None |
| Han et al. 2017 <sup>67</sup>      | US Urology residency programs                       | 3.3% of DCs, 4.5% of vice chairs, & 7.9% of division directors. For educational leadership roles, women comprised 9.4% of fellowship directors, 8.1% of residency directors, and 27.4% of medical student clerkship directors. | None | None                             | None | None | None |
| Moghimi et al. 2019 <sup>77</sup>  | Nuclear Medicine in Canada & US                     | 13.6% of leadership                                                                                                                                                                                                            | None | None                             | None | None | None |



|    |                    |                    |                              |              |      |      |      |
|----|--------------------|--------------------|------------------------------|--------------|------|------|------|
| 1  |                    |                    |                              |              |      |      |      |
| 2  |                    |                    |                              |              |      |      |      |
| 3  | Monroe et al.      | Department of      | 50% of PDs, 33% PDs          | Women        | None | None | None |
| 4  | 2015 <sup>78</sup> | Medicine at Johns  | assistant/associate          | leaders were |      |      |      |
| 5  |                    | Hopkins University | director, 27% fellowship     | appointed.   |      |      |      |
| 6  |                    |                    | PDs, 80% of fellowship       |              |      |      |      |
| 7  |                    |                    | program                      |              |      |      |      |
| 8  |                    |                    | assistant/associate          |              |      |      |      |
| 9  |                    |                    | director, & 37% of           |              |      |      |      |
| 10 |                    |                    | educational PDs.             |              |      |      |      |
| 11 |                    |                    | Women assistant              |              |      |      |      |
| 12 |                    |                    | professors were more         |              |      |      |      |
| 13 |                    |                    | likely to hold leadership    |              |      |      |      |
| 14 |                    |                    | positions than were men      |              |      |      |      |
| 15 |                    |                    | assistant professors ( $p =$ |              |      |      |      |
| 16 |                    |                    | 0.03).                       |              |      |      |      |
| 17 |                    |                    |                              |              |      |      |      |
| 18 |                    |                    |                              |              |      |      |      |
| 19 |                    |                    |                              |              |      |      |      |
| 20 |                    |                    |                              |              |      |      |      |
| 21 |                    |                    |                              |              |      |      |      |
| 22 |                    |                    |                              |              |      |      |      |
| 23 |                    |                    |                              |              |      |      |      |
| 24 |                    |                    |                              |              |      |      |      |
| 25 |                    |                    |                              |              |      |      |      |
| 26 |                    |                    |                              |              |      |      |      |
| 27 | Odell et al.       | Neurosurgery in    | 7.45% primary leadership     | None         | None | None | None |
| 28 | 2019 <sup>79</sup> | Canada and US      | 4.69% secondary              |              |      |      |      |
| 29 |                    |                    | leadership                   |              |      |      |      |
| 30 |                    |                    |                              |              |      |      |      |
| 31 |                    |                    |                              |              |      |      |      |
| 32 |                    |                    |                              |              |      |      |      |
| 33 | Rotbart et al.     | Promotion track    | 25% of section heads &       | None         | None | None | None |
| 34 | 2012 <sup>82</sup> | faculty            | 14% of vice-chairs.          |              |      |      |      |
| 35 |                    | the University of  |                              |              |      |      |      |
| 36 |                    | Colorado School of |                              |              |      |      |      |
| 37 |                    |                    |                              |              |      |      |      |
| 38 |                    |                    |                              |              |      |      |      |
| 39 |                    |                    |                              |              |      |      |      |
| 40 |                    |                    |                              |              |      |      |      |
| 41 |                    |                    |                              |              |      |      |      |
| 42 |                    |                    |                              |              |      |      |      |
| 43 |                    |                    |                              |              |      |      |      |
| 44 |                    |                    |                              |              |      |      |      |
| 45 |                    |                    |                              |              |      |      |      |
| 46 |                    |                    |                              |              |      |      |      |
| 47 |                    |                    |                              |              |      |      |      |

|                                       |                                                      |                                                                                                                                                                  |      |      |      |      |
|---------------------------------------|------------------------------------------------------|------------------------------------------------------------------------------------------------------------------------------------------------------------------|------|------|------|------|
|                                       | Medicine's<br>Department of<br>Pediatrics            |                                                                                                                                                                  |      |      |      |      |
| Shah et al.<br>2007 <sup>83</sup>     | US Radiology<br>residency program<br>directors.      | 10.7% of DCs, 42.9% of<br>PDs.<br>Gender composition of<br>radiology faculty &<br>residents does not differ<br>significantly according to<br>gender of leaders.  | None | None | None | None |
| Shah et al.<br>2010 <sup>84</sup>     | US Ophthalmology<br>residency programs<br>directors. | 2% of DCs, & 34% of<br>PDs.<br>Gender composition of<br>ophthalmology faculty &<br>residents does not differ<br>significantly according to<br>gender of leaders. | None | None | None | None |
| Woodward et<br>al. 2017 <sup>90</sup> | US<br>Gastroenterology<br>fellowship<br>programs.    | 18% of PDs, 28% of<br>associate PDs, 7% of<br>division chiefs.<br>Gender of fellowship PDs<br>& gender of division chief                                         | None | None | None | None |

( $p= 0.0327$ ), no  
association with faculty  
or resident composition.

---

### Women in leadership positions across several-specialties

---

|                                     |                                                                                                                                                                                   |                                                                                                                                                                                                     |      |      |      |      |
|-------------------------------------|-----------------------------------------------------------------------------------------------------------------------------------------------------------------------------------|-----------------------------------------------------------------------------------------------------------------------------------------------------------------------------------------------------|------|------|------|------|
| Burden et al.<br>2015 <sup>56</sup> | US academic adult<br>Hospital Medicine<br>(HM) & General<br>Internal Medicine<br>(GIM) programs                                                                                   | 16% of division or<br>section heads of HM<br>were women<br>35% of division or<br>section heads of GIM<br>were women<br>( $p = .008$ )                                                               | None | None | None | None |
| Hofler et al.<br>2016 <sup>69</sup> | US academic<br>departments of<br>Anesthesiology,<br>Diagnostic<br>Radiology, General<br>Surgery, Internal<br>Medicine,<br>Neurology,<br>Obstetrics &<br>Gynecology,<br>Pathology, | women comprised<br>13.9% of DCs,<br>22.6% of vice chairs,<br>21.6% of division<br>directors, &<br>39% of PDs.<br>Women significantly<br>underrepresented in<br>the combined<br>leadership positions | None | None | None | None |

---

|                                  |                                                                                                                                                  |                                                                                                                                                                                                                                          |      |      |      |      |
|----------------------------------|--------------------------------------------------------------------------------------------------------------------------------------------------|------------------------------------------------------------------------------------------------------------------------------------------------------------------------------------------------------------------------------------------|------|------|------|------|
|                                  | Pediatrics, & Psychiatry.                                                                                                                        | for all specialties (Ratios 0.61 or less; all $p < .001$ ) except anesthesiology & radiology                                                                                                                                             |      |      |      |      |
| Long et al. 2011 <sup>74</sup>   | US residency program identified as the largest in JAMA (Brotherton SE, Etzel SI. Graduate medical education, 2009–2010. JAMA 2010;304:1255–1270) | 25.8% of PDs overall were women. PDs 35.2% Obstetrics, 49% Pediatrics, 23.6% Family Medicine, 34.6% Psychiatry, 24.3% Internal Medicine, 18.8% Emergency Medicine, 29% Anesthesiology, 10.8% Surgery, 27.7% Radiology, 6.5% Orthopedics. | None | None | None | None |
| Puljak et al. 2008 <sup>80</sup> | University of Split School of Medicine in Croatia.                                                                                               | 18-21% of DCs in 1997-2006.                                                                                                                                                                                                              | None | None | None | None |

|    |                    |                    |                        |      |      |      |      |
|----|--------------------|--------------------|------------------------|------|------|------|------|
| 1  |                    |                    |                        |      |      |      |      |
| 2  |                    |                    |                        |      |      |      |      |
| 3  |                    |                    |                        |      |      |      |      |
| 4  |                    |                    |                        |      |      |      |      |
| 5  | Reed et al.        | women scholarly    | 56% of women held      | None | None | None | None |
| 6  | 2011 <sup>81</sup> | clinicians         | divisional,            |      |      |      |      |
| 7  |                    | employed at        | departmental,          |      |      |      |      |
| 8  |                    | Mayo Clinic with   | institutional or       |      |      |      |      |
| 9  |                    | 20 or              | national positions     |      |      |      |      |
| 10 |                    | more years of      | during their careers.  |      |      |      |      |
| 11 |                    | service at Mayo    | Total leadership       |      |      |      |      |
| 12 |                    | Clinic,            | position attainment    |      |      |      |      |
| 13 |                    | who spend          | between men and        |      |      |      |      |
| 14 |                    | more than 25% of   | women ( $p < 0.001$ )  |      |      |      |      |
| 15 |                    | their professional |                        |      |      |      |      |
| 16 |                    | effort directly    |                        |      |      |      |      |
| 17 |                    | providing patient  |                        |      |      |      |      |
| 18 |                    | care.              |                        |      |      |      |      |
| 19 |                    |                    |                        |      |      |      |      |
| 20 |                    |                    |                        |      |      |      |      |
| 21 |                    |                    |                        |      |      |      |      |
| 22 |                    |                    |                        |      |      |      |      |
| 23 |                    |                    |                        |      |      |      |      |
| 24 |                    |                    |                        |      |      |      |      |
| 25 |                    |                    |                        |      |      |      |      |
| 26 |                    |                    |                        |      |      |      |      |
| 27 |                    |                    |                        |      |      |      |      |
| 28 |                    |                    |                        |      |      |      |      |
| 29 | Weiss et al.       | US General         | General surgery chairs | None | None | None | None |
| 30 | 2014 <sup>54</sup> | Surgery,           | 3% & PDs 10% ( $p =$   |      |      |      |      |
| 31 |                    | Orthopedic         | .002)                  |      |      |      |      |
| 32 |                    | Surgery,           | Orthopedic Surgery     |      |      |      |      |
| 33 |                    | Otolaryngology,    | 0% & PDs 6% ( $p =$    |      |      |      |      |
| 34 |                    | Neurosurgery,      | .002)                  |      |      |      |      |
| 35 |                    | Plastic Surgery,   |                        |      |      |      |      |
| 36 |                    |                    |                        |      |      |      |      |
| 37 |                    |                    |                        |      |      |      |      |
| 38 |                    |                    |                        |      |      |      |      |
| 39 |                    |                    |                        |      |      |      |      |
| 40 |                    |                    |                        |      |      |      |      |
| 41 |                    |                    |                        |      |      |      |      |
| 42 |                    |                    |                        |      |      |      |      |
| 43 |                    |                    |                        |      |      |      |      |
| 44 |                    |                    |                        |      |      |      |      |
| 45 |                    |                    |                        |      |      |      |      |
| 46 |                    |                    |                        |      |      |      |      |
| 47 |                    |                    |                        |      |      |      |      |

1  
2  
3  
4  
5  
6  
7  
8  
9  
10  
11  
12  
13  
14  
15  
16  
17  
18  
19  
20  
21  
22  
23  
24  
25  
26  
27  
28  
29  
30  
31  
32  
33  
34  
35  
36  
37  
38  
39  
40  
41  
42  
43  
44  
45  
46  
47

|                                                               |                                                                        |                                                                                                                                                                               |                                                                      |      |      |      |
|---------------------------------------------------------------|------------------------------------------------------------------------|-------------------------------------------------------------------------------------------------------------------------------------------------------------------------------|----------------------------------------------------------------------|------|------|------|
|                                                               | and Urology programs.                                                  | Otolaryngology 5% of chairs & 13% of PDs ( $p = .045$ )<br>Neurosurgery 1% of chairs & 3% of PDs<br>Plastic Surgery 6% of chairs & 9% of PDs<br>Urology 3% of chairs & 6% PDs |                                                                      |      |      |      |
| Wright et al. 2003 <sup>91</sup>                              | Faculty members of the school of medicine at the University of Arizona | 55% served as committee chair, 10% as section or division head, & 8% as DCs. As compared to men: ( $p=0.03$ ), ( $p=0$ ), ( $p=0.003$ )                                       | Comment on self-assessed leadership potential. Women were appointed. | None | None | None |
| <b>Women leaders across several institutions or countries</b> |                                                                        |                                                                                                                                                                               |                                                                      |      |      |      |
| Carr et al. 2018 <sup>58</sup>                                | US academic medical faculty                                            | 10% of women in sample had leadership roles ( $p < 0.0001$ ). After adjusting for scholarly productivity,                                                                     |                                                                      | None | None | None |

|                                    |                                                                                                            |                                                  |      |      |      |      |
|------------------------------------|------------------------------------------------------------------------------------------------------------|--------------------------------------------------|------|------|------|------|
|                                    |                                                                                                            | the OR = 0.49 (95%<br>CI, 0.35-.69)              |      |      |      |      |
| Kvaerner et al. 1999 <sup>72</sup> | Norwegian physicians.                                                                                      | 6.4% of women were leaders.<br>95% CI (2.6-13.9) | None | None | None | None |
| Stadler et al. 2017 <sup>87</sup>  | Clinician educators & leadership of competency based graduate medical education in Qatar, Singapore, & UAE | 22.1% of PDs & 22.1% of associate PDs.           | None | None | None | None |

Abbreviations: DC, department chairs; PD, program director

**Table 2**

**Thematic analysis of the 16 quantitative articles that examined the hindering factors associated with women's leadership emergence and enactment.**

| Theme                       | Sub-theme  | Level         | Outcome                                                                                           | Result                                                                                                                                                                                                                                                                                                                                                                           |
|-----------------------------|------------|---------------|---------------------------------------------------------------------------------------------------|----------------------------------------------------------------------------------------------------------------------------------------------------------------------------------------------------------------------------------------------------------------------------------------------------------------------------------------------------------------------------------|
| <b>Leadership emergence</b> | Research   | Institutional | Increased production of research is associated with leadership attainment.                        | Senior leadership positions were more likely held by male faculty despite research publications (OR = 0.49; 95% CI, 0.35–0.69). <sup>58</sup>                                                                                                                                                                                                                                    |
|                             | Production |               | Timing of leadership appointments (mid-career) negatively affected by modest research production. | Women published fewer articles throughout their careers than men (M = 29.5, SD = 28.8 versus M = 75.8, SD = 60.3 – $p = .001$ ). However, after 27 years, women produced a mean of 1.57 more publications annually than men ( $p = .001$ ).<br>Throughout their careers, women held fewer leadership roles than men ( $p = .001$ ). <sup>81</sup>                                |
|                             |            |               | Decreased research production                                                                     | Gender was indirectly significantly associated with clinical position through publication activity ( $\beta = -.08$ , 95%CI = $-.14$ to $-.04$ , $p = .003$ ). The negative association between gender and publication activity ( $\beta = -.21$ , $p = .001$ ). The negative association between gender and publication activity ( $\beta = -.21$ , $p < 0.001$ ) <sup>70</sup> |



|                             |                                           |               |                                                                               |                                                                                                                                                                                                                                                                                                                          |
|-----------------------------|-------------------------------------------|---------------|-------------------------------------------------------------------------------|--------------------------------------------------------------------------------------------------------------------------------------------------------------------------------------------------------------------------------------------------------------------------------------------------------------------------|
|                             | Mentorship                                | Interpersonal | Lack of mentorship may hinder women from becoming leaders.                    | Women chairs were more likely than men chairs to perceive barriers in their career development citing little or no mentorship ( $p=0.04$ ). <sup>63</sup>                                                                                                                                                                |
|                             | Time of academic appointment              | -             | Entering academia belatedly may contribute to leadership disparities.         | Women faculty in the UCSOM Department of Pediatrics entered academia at a later career stage, in part, resulted in women trying to advance at a later stage than men in academic position and tenure. <sup>82</sup>                                                                                                      |
|                             | Educational background & advanced degrees | Institutional | Educational background & types of degrees may influence leadership selection. | A greater percentage of male deans graduated from the top 50 NIH-ranked research-award schools than women deans ( $p = .005$ , $\omega^2 = 23.3%$ , $\eta^2 = 25.4%$ )<br>Doctorate degrees were more prevalent among men deans as opposed to business-related degrees among women (MBA, MHA, MPH, or JD). <sup>88</sup> |
| <b>Leadership enactment</b> | Policy development & translation          | Institutional | Dismissal of work-life balance measures.                                      | Out of the 15 family-friendly policies, only 3 were available at more than 68% of medical schools: benefits for part-time faculty, paid maternity & paternity leave. <sup>61</sup>                                                                                                                                       |
|                             |                                           | Institutional | Dismissal of diversity & inclusion measures.                                  | Fewer than 14% of schools implemented gender equity specific policies. <sup>61</sup>                                                                                                                                                                                                                                     |

|              |               |                                                                   |                                                                                                                                                                                                                                                                                    |
|--------------|---------------|-------------------------------------------------------------------|------------------------------------------------------------------------------------------------------------------------------------------------------------------------------------------------------------------------------------------------------------------------------------|
|              |               |                                                                   | Women faculty showed more negative perceptions on equity for women (T=-19.82, p<0.001); institutional change efforts for diversity (T=-9.70, p<0.001). <sup>5</sup>                                                                                                                |
|              | Institutional | Incongruence between organizational values & individual values.   | Women faculty showed more negative perceptions on values alignment (T= -2.06, p<0.05). <sup>5</sup>                                                                                                                                                                                |
| Stereotyping | Institutional | Existence of gendered language in leadership associated policies. | Being a leader is associated with being male (M= 2.4, SD=2.2 – OR= 6, CI 1.02, 35.37) & traditionally male associated traits: analytical (M=2.5, SD=2.4); independent (M= 3.1, SD= 2.6 – OR=1, CI 0.2, 5.1); & individualistic (M=1.8, SD= 1.5 – OR= 1, CI 0.2, 5.4) <sup>15</sup> |
|              | Interpersonal | Existence of implicit gender bias, favoring men as leaders.       | Slight implicit preference for men leaders over women (IAT D score = .16, SD = 0.42). <sup>66</sup>                                                                                                                                                                                |

**Table 3****Women's leadership programs in academic medicine and their influence on leadership enactment**

| Citation                          | Program | Purpose                                                                                                                                                     | Result                                                                                                                                                                                                             | Examination of leadership enactment |           |         |        |
|-----------------------------------|---------|-------------------------------------------------------------------------------------------------------------------------------------------------------------|--------------------------------------------------------------------------------------------------------------------------------------------------------------------------------------------------------------------|-------------------------------------|-----------|---------|--------|
|                                   |         |                                                                                                                                                             |                                                                                                                                                                                                                    | Values                              | Behaviors | Actions | Styles |
| Dannels et al. 2009 <sup>62</sup> | ELAM    | Evaluate a leadership program & its impact from medical school leadership perspective.                                                                      | Medical school deans' (M = 5.62 out of 7), with those having more fellows reporting greater benefit ( $p = 0.01$ ), positive influence on alumnae (M = 6.27), & increase their eligibility for promotion (M = 5.7) | Yes                                 | Yes       | Yes     | Yes    |
| Dannels et al. 2008 <sup>63</sup> | ELAM    | Determine the extent to which program participants, compared with women from two comparison groups, aspire to leadership, demonstrate mastery of leadership | ELAM participants scored higher than AAMC & NON-groups in 15 of the indicators, and for 1 indicator they scored higher than the AAMC group (aspiration to leadership outside academic health centers).             | Yes                                 | Yes       | Yes     | Yes    |

competencies, and attain leadership positions. The differences were statistically significant for 12 indicators. Indicators, including 7 of the leadership competencies, 3 of the administrative leadership attainment indicators, & 2 of the leadership aspirations & education indicators.

|                                    |                        |                                            |                                                                                                                                                                      |      |      |      |                   |
|------------------------------------|------------------------|--------------------------------------------|----------------------------------------------------------------------------------------------------------------------------------------------------------------------|------|------|------|-------------------|
| Helitzer et al. 2014 <sup>68</sup> | EWIM<br>MidWIM<br>ELAM | Perceptions of CPD program alumnae of CPD. | Across all 3 CPDs leadership aspiration was aligned with career stage; full professors reported more interest in leadership than associate professors ( $p = .043$ ) | None | Yes  | Yes  | Yes               |
| Levine et al. 2015 <sup>73</sup>   | Johns Hopkins          | Evaluation of 3 cohorts of a               | Significant improvement across 11 leadership                                                                                                                         | Yes  | None | None | Used Myers Briggs |

|    |                    |             |                        |                             |      |            |             |            |
|----|--------------------|-------------|------------------------|-----------------------------|------|------------|-------------|------------|
| 1  |                    |             |                        |                             |      |            |             |            |
| 2  |                    |             |                        |                             |      |            |             |            |
| 3  |                    | University  | longitudinal           | domains except: public      |      |            |             | Type       |
| 4  |                    | School of   | program.               | speaking & working in       |      |            |             | Indicator  |
| 5  |                    | Medicine    |                        | teams.                      |      |            |             | from the   |
| 6  |                    | Leadership  |                        |                             |      |            |             | generic    |
| 7  |                    | Program for |                        |                             |      |            |             | leadership |
| 8  |                    | Women       |                        |                             |      |            |             | literature |
| 9  |                    | Faculty     |                        |                             |      |            |             | to         |
| 10 |                    |             |                        |                             |      |            |             | ascertain  |
| 11 |                    |             |                        |                             |      |            |             | leadership |
| 12 |                    |             |                        |                             |      |            |             | style.     |
| 13 |                    |             |                        |                             |      |            |             |            |
| 14 |                    |             |                        |                             |      |            |             |            |
| 15 |                    |             |                        |                             |      |            |             |            |
| 16 | McDade             | ELAM        | Measures impact of     | Increased leadership        | None | Yes;       | Yes;        | Asked      |
| 17 | et al.             |             | ELAM program.          | capabilities across all ten |      | Networking | conflict    | about      |
| 18 | 2004 <sup>75</sup> |             |                        | identified constructs.      |      | and        | resolution, | women's    |
| 19 |                    |             |                        |                             |      | coalition  | financial   | leadership |
| 20 |                    |             |                        |                             |      | building.  | management  | styles     |
| 21 |                    |             |                        |                             |      |            |             |            |
| 22 |                    |             |                        |                             |      |            |             |            |
| 23 |                    |             |                        |                             |      |            |             |            |
| 24 |                    |             |                        |                             |      |            |             |            |
| 25 | Skarupski          | Johns       | Participants'          | Increased leadership        | Yes  | Yes        | Yes         | Yes        |
| 26 | et al.             | Hopkins     | perceptions in 3       | capabilities across 4       |      |            |             |            |
| 27 | 2019 <sup>85</sup> | University  | areas: program         | constructs: Foundational    |      |            |             |            |
| 28 |                    | School of   | impact, leadership     | skills, personal experience |      |            |             |            |
| 29 |                    | Medicine    | preparedness, and      | of leadership, sense of     |      |            |             |            |
| 30 |                    | Leadership  | barriers to leadership | professional community      |      |            |             |            |
| 31 |                    | Program for | advancement.           | and belonging, and          |      |            |             |            |
| 32 |                    | Women       |                        | networking                  |      |            |             |            |
| 33 |                    | Faculty     |                        |                             |      |            |             |            |
| 34 |                    |             |                        |                             |      |            |             |            |
| 35 |                    |             |                        |                             |      |            |             |            |
| 36 |                    |             |                        |                             |      |            |             |            |
| 37 |                    |             |                        |                             |      |            |             |            |
| 38 |                    |             |                        |                             |      |            |             |            |
| 39 |                    |             |                        |                             |      |            |             |            |
| 40 |                    |             |                        |                             |      |            |             |            |
| 41 |                    |             |                        |                             |      |            |             |            |
| 42 |                    |             |                        |                             |      |            |             |            |
| 43 |                    |             |                        |                             |      |            |             |            |
| 44 |                    |             |                        |                             |      |            |             |            |
| 45 |                    |             |                        |                             |      |            |             |            |
| 46 |                    |             |                        |                             |      |            |             |            |
| 47 |                    |             |                        |                             |      |            |             |            |

---

|    |                    |          |                      |                      |      |      |      |
|----|--------------------|----------|----------------------|----------------------|------|------|------|
| 1  |                    |          |                      |                      |      |      |      |
| 2  |                    |          |                      |                      |      |      |      |
| 3  | Spalluto           | LIFT-OFF | Report of design,    | 31% of educational   | None | None | None |
| 4  | et al.             |          | implementation, &    | modules were useful. |      |      |      |
| 5  |                    |          | evaluation of        |                      |      |      |      |
| 6  | 2017 <sup>86</sup> |          | leadership           |                      |      |      |      |
| 7  |                    |          | intervention to      |                      |      |      |      |
| 8  |                    |          | further the training |                      |      |      |      |
| 9  |                    |          | of female faculty.   |                      |      |      |      |
| 10 |                    |          |                      |                      |      |      |      |
| 11 |                    |          |                      |                      |      |      |      |
| 12 |                    |          |                      |                      |      |      |      |
| 13 |                    |          |                      |                      |      |      |      |
| 14 |                    |          |                      |                      |      |      |      |
| 15 |                    |          |                      |                      |      |      |      |
| 16 |                    |          |                      |                      |      |      |      |
| 17 |                    |          |                      |                      |      |      |      |
| 18 |                    |          |                      |                      |      |      |      |
| 19 |                    |          |                      |                      |      |      |      |
| 20 |                    |          |                      |                      |      |      |      |
| 21 |                    |          |                      |                      |      |      |      |
| 22 |                    |          |                      |                      |      |      |      |
| 23 |                    |          |                      |                      |      |      |      |
| 24 |                    |          |                      |                      |      |      |      |
| 25 |                    |          |                      |                      |      |      |      |
| 26 |                    |          |                      |                      |      |      |      |
| 27 |                    |          |                      |                      |      |      |      |
| 28 |                    |          |                      |                      |      |      |      |
| 29 |                    |          |                      |                      |      |      |      |
| 30 |                    |          |                      |                      |      |      |      |
| 31 |                    |          |                      |                      |      |      |      |
| 32 |                    |          |                      |                      |      |      |      |
| 33 |                    |          |                      |                      |      |      |      |
| 34 |                    |          |                      |                      |      |      |      |
| 35 |                    |          |                      |                      |      |      |      |
| 36 |                    |          |                      |                      |      |      |      |
| 37 |                    |          |                      |                      |      |      |      |
| 38 |                    |          |                      |                      |      |      |      |
| 39 |                    |          |                      |                      |      |      |      |
| 40 |                    |          |                      |                      |      |      |      |
| 41 |                    |          |                      |                      |      |      |      |
| 42 |                    |          |                      |                      |      |      |      |
| 43 |                    |          |                      |                      |      |      |      |
| 44 |                    |          |                      |                      |      |      |      |
| 45 |                    |          |                      |                      |      |      |      |
| 46 |                    |          |                      |                      |      |      |      |
| 47 |                    |          |                      |                      |      |      |      |

---

1  
2  
3  
4  
5  
6  
7  
8  
9  
10  
11  
12  
13  
14  
15  
16  
17  
18  
19  
20  
21  
22  
23  
24  
25  
26  
27  
28  
29  
30  
31  
32  
33  
34  
35  
36  
37  
38  
39  
40  
41  
42  
43  
44  
45  
46  
47  
48  
49  
50  
51  
52  
53  
54  
55  
56  
57  
58  
59  
60

**Identification**

**S c r e e n i n g**

**E l i g i b i l i t y**

**I n c l u d e d**

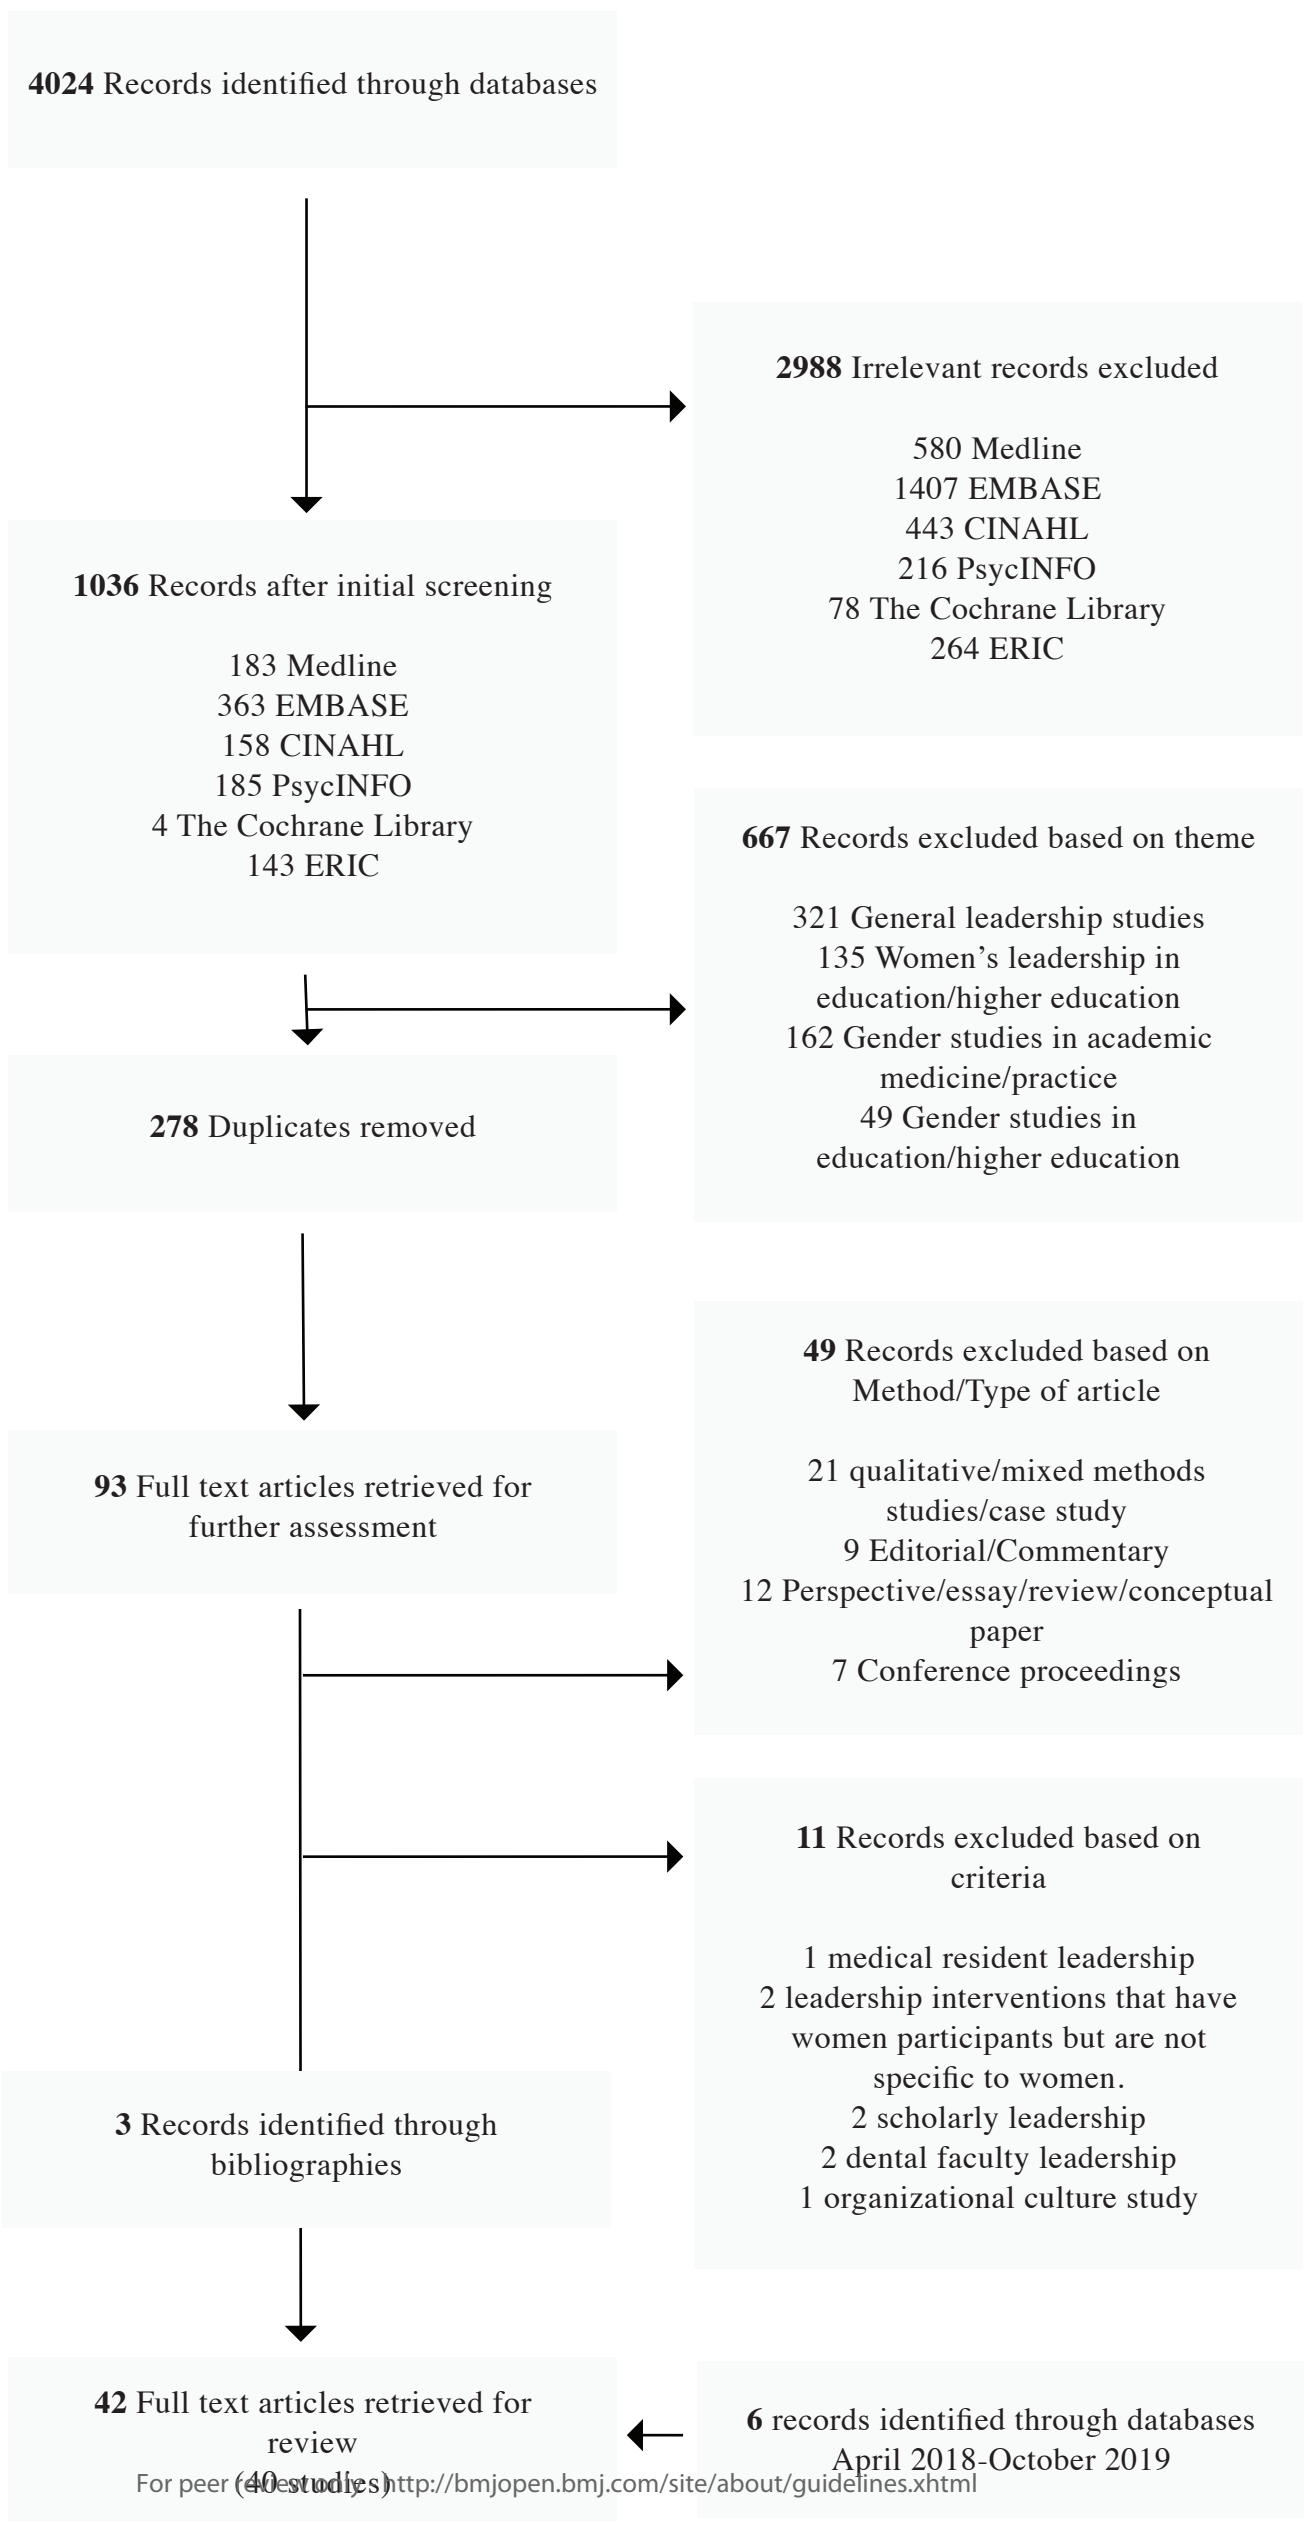

## Supplementary material 1

Characteristics of the 40 articles reviewed from earliest date available – October 2019.

| Citation                          | Country | Study Design         | Study Purpose                                                                                                                                     | Time Frame            | N +/- RR                                                           | Data Source                                                                                                                                         | Methodological limitations                                                                                                                                                                                                                                                                                                                                                                                      | MERSQI Score |
|-----------------------------------|---------|----------------------|---------------------------------------------------------------------------------------------------------------------------------------------------|-----------------------|--------------------------------------------------------------------|-----------------------------------------------------------------------------------------------------------------------------------------------------|-----------------------------------------------------------------------------------------------------------------------------------------------------------------------------------------------------------------------------------------------------------------------------------------------------------------------------------------------------------------------------------------------------------------|--------------|
| Baecher-Lind 2012 <sup>55</sup> ¶ | USA     | Retrospective cohort | Determine whether the proportion of leadership positions in OBS/GYNE held by women is consistent with the proportion of women entering residency. | July-Aug 2012         | 155 academic department chairs                                     | Department websites for name & sex of leader & state medical license databases for graduation year.                                                 | <p><i>Limited population:</i> no report on other leadership positions: vice-chairs, program directors, or unit heads.</p> <p><i>Lack of contextual demographic data:</i> ethnicity, marital status, or age.</p> <p><i>Lack of contextual career data:</i> career stage, dual leadership appointments, or formal leadership training.</p> <p>Does not differentiate community-based &amp; academic programs.</p> | 10.5         |
| Burden et al. 2015 <sup>56</sup>  | USA     | Retrospective cohort | Determine the existence of gender disparities among academic hospitalists in leadership & scholarly productivity & compare the results            | Oct, 2012 – Aug, 2014 | 69 Hospital Medicine (HM) Programs<br>80 General Internal Medicine | Graduate Medical Education Directory (AAMC listed members fully accredited by the Liaison Committee on Medical Education) for programs & department | <p><i>No information on or adjustment for size, age or geographic location of HM or GIM departments.</i></p> <p>It was unclear whether HM departments were divisions or sections of GIM departments.</p>                                                                                                                                                                                                        | 10.5         |



1  
2  
3  
4  
5  
6  
7  
8  
9  
10  
11  
12  
13  
14  
15  
16  
17  
18  
19  
20  
21  
22  
23  
24  
25  
26  
27  
28  
29  
30  
31  
32  
33  
34  
35  
36  
37  
38  
39  
40  
41  
42  
43  
44  
45  
46

|                                     |     |                      |                                                                                                                    |              |                                                                  |                                                                                                                     |                                                                                                                                                                                                                                                          |     |
|-------------------------------------|-----|----------------------|--------------------------------------------------------------------------------------------------------------------|--------------|------------------------------------------------------------------|---------------------------------------------------------------------------------------------------------------------|----------------------------------------------------------------------------------------------------------------------------------------------------------------------------------------------------------------------------------------------------------|-----|
|                                     |     |                      | with academic general internists.                                                                                  |              | (GIM) Programs                                                   | websites for sex of leaders, & number/sex of faculty, & Program contacted through email if necessary                |                                                                                                                                                                                                                                                          |     |
| Cancian et al. 2018 <sup>57</sup> ¶ | USA | Cross-sectional      | Determine the number of women in urological leadership positions.                                                  | July 2016    | NA                                                               | Accreditation Council for Graduate Medical Education.                                                               | <i>Lack of contextual demographic data:</i> ethnicity, marital status, or age.<br><br><i>Lack of contextual career data:</i> dual leadership appointments, or formal leadership training.<br><br>Not clear which departments were academic vs community. | 8.5 |
| Carr et al. 2018 <sup>58</sup> \$   | USA | Retrospective cohort | Identify predictors of advancement, retention, & leadership for women faculty from a 1995 National Faculty Survey. | 1995-2012/13 | 1995: 1801 faculty, RR = 60%<br><br>2012: 1273 faculty, RR = 48% | Mailed national faculty questionnaire conducted in 1995 & a follow-up online self-reported questionnaire in 2012-13 | No methodological deficits were identified.                                                                                                                                                                                                              | 12  |
| Cheng et al. 2006 <sup>59</sup>     | USA | Cross-sectional      | Determine if there is an association between the gender                                                            | Dec, 2004    | 133 EM programs                                                  | Society for Academic Emergency                                                                                      | Authors claim retrospective design & although trend of chairperson gender is                                                                                                                                                                             | 9.5 |

|                                     |                |                 |                                                                                                                                                                                                                |                      |                                                                       |                                                                                                      |                                                                                                                                                                                                                                                            |      |
|-------------------------------------|----------------|-----------------|----------------------------------------------------------------------------------------------------------------------------------------------------------------------------------------------------------------|----------------------|-----------------------------------------------------------------------|------------------------------------------------------------------------------------------------------|------------------------------------------------------------------------------------------------------------------------------------------------------------------------------------------------------------------------------------------------------------|------|
|                                     |                |                 | of the chairperson/program director & the gender of Emergency Medicine (EM) faculty.                                                                                                                           |                      |                                                                       | Medicine online residency catalog, program websites, & program contacted through email if necessary. | reported, this does not qualify as a retrospective cohort.<br><br><i>Lack of contextual demographic data:</i> Ethnicity, marital status, or age.<br><br><i>Lack of contextual career data:</i> dual leadership appointments or formal leadership training. |      |
| Counter et al. 2019 <sup>60</sup>   | USA and Canada | Cross-sectional | Assess the evidence of gender disparities and gender differences in academic performance in pediatric radiology departments in USA & Canada                                                                    | Jan 2017 to Jan 2018 | n=279 of 170 US and 13 Canadian programs                              | FREIDA and CaRMS                                                                                     | <i>Lack of contextual demographic data:</i> Ethnicity, marital status, or age.<br><br><i>Lack of contextual career data:</i> dual leadership appointments or formal leadership training                                                                    | 9.5  |
| Dannels et al. 2009 <sup>61</sup> # | USA            | Cross-sectional | Elicit the perceptions of deans on their medical schools' organizational climate & its effect on faculty, policies affecting faculty, processes deans use for developing faculty leadership, and the impact of | May, 2006            | 142 medical school deans:<br><br>Overall RR= 58%<br><br>72 men RR=57% | AAMC for medical schools & online self-reported questionnaire.                                       | Small sample size of women deans limits detecting relevant statistical effect.<br><br><i>Lack of contextual demographic data:</i> Ethnicity, marital status, or age.<br><br><i>Lack of contextual career data:</i> dual leadership                         | 10.5 |

1  
2  
3  
4  
5  
6  
7  
8  
9  
10  
11  
12  
13  
14  
15  
16  
17  
18  
19  
20  
21  
22  
23  
24  
25  
26  
27  
28  
29  
30  
31  
32  
33  
34  
35  
36  
37  
38  
39  
40  
41  
42  
43  
44  
45  
46

|                                    |     |                                            |                                                                                                                                                                                                                |             |                                                                                              |                                                                                                                                                                                                                 |                                                                                                                                                                                           |      |
|------------------------------------|-----|--------------------------------------------|----------------------------------------------------------------------------------------------------------------------------------------------------------------------------------------------------------------|-------------|----------------------------------------------------------------------------------------------|-----------------------------------------------------------------------------------------------------------------------------------------------------------------------------------------------------------------|-------------------------------------------------------------------------------------------------------------------------------------------------------------------------------------------|------|
|                                    |     |                                            | the ELAM Program for Women.                                                                                                                                                                                    |             | 11 women<br>RR=69%                                                                           |                                                                                                                                                                                                                 | appointments or formal leadership training.                                                                                                                                               |      |
| Dannels et al. 2008 <sup>62#</sup> | USA | Pre/post intervention & prospective cohort | Determine the extent of leadership aspiration, mastery of leadership competencies, & attainment of leadership positions amongst graduates of the ELAM compared to 2 comparison groups (NON-ELAM & AAMC group). | 2002-06     | 78 ELAM graduates, RR = 73%<br><br>63 NON-ELAM group, RR= 44%<br><br>468 AAMC group, RR= 38% | Online self-reported questionnaires.                                                                                                                                                                            | No methodological deficits were identified.                                                                                                                                               | 12.5 |
| Doyle et al. 2016 <sup>63</sup>    | USA | Cross-sectional                            | Investigate the causative factors contributing to gender disparity in senior leadership positions in academic psychiatry.                                                                                      | April, 2014 | 118 (final n =109)<br><br>Overall RR = 39%<br><br>97 men chairs RR = 34%<br><br>12 women     | Publicly available data: American Association of Chairs of Departments of Psychiatry (AACDP) for psychiatry chair names, department websites for demographic information, & online self-reported questionnaire. | Problematic survey design: Assumption of prior leadership knowledge.<br><br>Objective does not align with study design: causation cannot be established in cross-sectional study designs. | 8    |

1  
2  
3  
4  
5  
6  
7  
8  
9  
10  
11  
12  
13  
14  
15

---

16  
17  
18  
19  
20  
21  
22  
23

|                                     |     |                 |                                                                                                                         |                |                                                                                     |                                                                                                                                |                                                                                                                                                                             |     |
|-------------------------------------|-----|-----------------|-------------------------------------------------------------------------------------------------------------------------|----------------|-------------------------------------------------------------------------------------|--------------------------------------------------------------------------------------------------------------------------------|-----------------------------------------------------------------------------------------------------------------------------------------------------------------------------|-----|
| Ellinas et al. 2018 <sup>64</sup> § | USA | Cross-sectional | Identify factors that promote medical faculty's engagement & gender difference in those factors.                        | June-Aug, 2013 | 1456 faculty members<br>RR= 42%<br><br>227 women                                    | Online self-reported questionnaire.                                                                                            | No methodological deficits were identified.                                                                                                                                 | 9   |
| Epperson et al. 2019 <sup>65</sup>  | USA | Cross-sectional | Evaluates representation of women in otolaryngology holding residency and fellowship directorships, or chair positions. | 2017-18        | 99 department chairs<br><br>102 residency directors<br><br>204 fellowship directors | Publicly available data: American Medical Association's Fellowship and Residency Interactive Database.<br><br>Program websites | Lack of contextual demographic data: ethnicity, marital status, or age.<br><br>Lack of contextual career data: dual leadership appointments, or formal leadership training. | 9.5 |

---

24  
25  
26  
27  
28  
29  
30  
31  
32  
33  
34  
35  
36  
37  
38  
39  
40  
41  
42  
43  
44  
45  
46

1  
2  
3  
4  
5  
6  
7  
8  
9  
10  
11  
12  
13  
14  
15  
16  
17  
18  
19  
20  
21  
22  
23  
24  
25  
26  
27  
28  
29  
30  
31  
32  
33  
34  
35  
36  
37  
38  
39  
40  
41  
42  
43  
44  
45  
46

|                                    |     |                       |                                                                                                                                                                |                        |                                   |                                                                                                                                                 |                                                                                                                                                                                          |     |
|------------------------------------|-----|-----------------------|----------------------------------------------------------------------------------------------------------------------------------------------------------------|------------------------|-----------------------------------|-------------------------------------------------------------------------------------------------------------------------------------------------|------------------------------------------------------------------------------------------------------------------------------------------------------------------------------------------|-----|
| Girod et al. 2016 <sup>66</sup>    | USA | Pre/post intervention | Investigate the implicit & explicit biases favoring men as leaders & assess whether these attitudes change following an educational intervention.              | March 2012- April 2013 | 281 faculty members               | Questionnaire for general perceptions of bias, measure of explicit attitudes related to gender & leadership, & Implicit Association Test (IAT). | Findings limited by lack of longitudinal data on effectiveness of intervention.                                                                                                          | 9.5 |
| Han et al. 2017 <sup>67§</sup>     | USA | Cross-sectional       | Determine the gender & subspecialty of those holding academic departmental, administrative & educational leadership roles in urology.                          | June-Aug, 2016         | 124 urology programs              | Accreditation Council for Graduate Medical Education for programs & Urology department websites for main data. Program contacted if necessary.  | <i>Lack of contextual demographic data:</i> Ethnicity, marital status, or age.<br><br><i>Lack of contextual career data:</i> dual leadership appointments or formal leadership training. | 8.5 |
| Helitzer et al. 2014 <sup>68</sup> | USA | Cross-sectional       | Explore whether skills acquired by women in career development programs implemented by AAMC & Drexel University would vary by career stage & program attended. | Feb – April, 2011      | 2537 women participants, RR = 35% | National online self-reported questionnaire.                                                                                                    | <i>Limited population:</i> Loss of follow-up on participants who left academic medicine.                                                                                                 | 9   |

|                                                                                                 |                                    |                                     |                 |                                                                                                                                                                                                        |                       |                                                  |                                                                                                                        |                                                                                                                                                                        |     |
|-------------------------------------------------------------------------------------------------|------------------------------------|-------------------------------------|-----------------|--------------------------------------------------------------------------------------------------------------------------------------------------------------------------------------------------------|-----------------------|--------------------------------------------------|------------------------------------------------------------------------------------------------------------------------|------------------------------------------------------------------------------------------------------------------------------------------------------------------------|-----|
| 1<br>2<br>3<br>4<br>5<br>6<br>7<br>8<br>9<br>10<br>11<br>12<br>13<br>14<br>15<br>16<br>17<br>18 | Hofler et al. 2016 <sup>69^</sup>  | USA                                 | Cross-sectional | Compare the representation of women in OB/GYNE department-based leadership to leadership in other clinical specialties while accounting for the proportions of women in the residency cohorts of 1990. | Nov-2012 to Oct, 2013 | 851 eligible programs<br><br>105 OB/GYN programs | Accreditation Council for Graduate Medical Education 2012-13 for programs & program websites for leadership positions. | <i>Lack of contextual demographic data:</i> ethnicity, or age.<br><br>Assumption that women choose academic medicine early in their career in equal proportion to men. | 9.5 |
| 19<br>20<br>21<br>22<br>23<br>24<br>25                                                          | Komlenac et al. 2019 <sup>70</sup> | Sweden, the Netherlands and Austria | Cross-sectional | Explore gender differences in clinical position among academic physicians at three university hospitals                                                                                                | 2012                  | 1333 participants                                | Questionnaire of the HOUPE II study                                                                                    | Low response rate<br><br>Leadership positions were limited to clinical positions; no mention of academic leadership posts                                              | 8   |
| 26<br>27<br>28<br>29<br>30<br>31<br>32<br>33                                                    | Kuhlmann et al. 2017 <sup>71</sup> | Sweden, Germany, Austria, &UK       | Case study      | Explore & compare the representation of women in leadership and management in European academic health centers.                                                                                        | May, 2016             | 4 academic health centers                        | Unspecified                                                                                                            | No methodological deficits were identified.                                                                                                                            | NA  |
| 34<br>35<br>36<br>37<br>38<br>39<br>40<br>41<br>42<br>43<br>44<br>45<br>46                      | Kværner et al. 1999 <sup>72</sup>  | Norway                              | Cross-sectional | Determine the proportion of women leaders to men leaders.                                                                                                                                              | Oct, 1997             | Overall reported 13,844 physician                | Norwegian Medical Association records.                                                                                 | No methodological deficits were identified.                                                                                                                            | 9.5 |

|                                  |     |                       |                                                                                                                                          |           |                                                                                      |                                                                                                                                         |                                              |     |
|----------------------------------|-----|-----------------------|------------------------------------------------------------------------------------------------------------------------------------------|-----------|--------------------------------------------------------------------------------------|-----------------------------------------------------------------------------------------------------------------------------------------|----------------------------------------------|-----|
|                                  |     |                       |                                                                                                                                          |           | s; 3939 women.                                                                       |                                                                                                                                         |                                              |     |
|                                  |     |                       |                                                                                                                                          |           | <i>N</i> in academic medicine 334; 94 women                                          |                                                                                                                                         |                                              |     |
| Levine et al. 2015 <sup>73</sup> | USA | Pre/post intervention | Describe & evaluate a longitudinal cohort-based leadership program for women faculty at the Johns Hopkins University School of Medicine. | 2010-2013 | 134 women<br>RR cohort 2: 80%, 58%<br>RR cohort 3: 86%, 76%<br>RR cohort 4: 92%, 69% | Self-reported questionnaire.                                                                                                            | No follow up on long term effect of program. | 8.5 |
| Long et al. 2011 <sup>74</sup>   | USA | cross-sectional       | Compare the gender distribution of residency program directors with gender distribution of residents & faculty                           | NA        | 601 female program directors<br>75,156 Residents                                     | Educational issue of JAMA, 2010 for information on the 10 largest residency specialties.<br>ACGME website for number and program names. | No methodological deficits were identified.  | 9.5 |

|                                    |     |                       |                                                                                                                                                              |           |                                                                       |                                                                                                                                                  |                                                                                                                                                                                                                                                 |      |
|------------------------------------|-----|-----------------------|--------------------------------------------------------------------------------------------------------------------------------------------------------------|-----------|-----------------------------------------------------------------------|--------------------------------------------------------------------------------------------------------------------------------------------------|-------------------------------------------------------------------------------------------------------------------------------------------------------------------------------------------------------------------------------------------------|------|
|                                    |     |                       | in the 10 largest specialties.                                                                                                                               |           |                                                                       | AAMC for gender distribution of medical school faculty.                                                                                          |                                                                                                                                                                                                                                                 |      |
| Marchant et al. 2007 <sup>15</sup> | USA | Retrospective cohort  | Examine whether the presence of the word "leader" in written tenure criteria may impact the promotion of women in elite medical school differently than men. | 2004      | 24 medical schools                                                    | Carnegie Foundation classification system and the National Institutes of Health (NIH) for medical schools. School's website for tenure criteria. | Limited sample size (24/125), does not account for recruitment or departure of tenured female faculty, or the number of faculty who apply for tenure.<br><br>Wide C.I. (1.02, 35.37)<br>Uncertainty is greater with wider confidence intervals. | 11.5 |
| McDade et al. 2004 <sup>75#</sup>  | USA | Pre/post intervention | Measure the impact of the ELAM program on women academicians' leadership capacities.                                                                         | 1997-2001 | 79 participants<br><br>RRs were nearly 100% (pre) & 69% to 76% (post) | Self-reported questionnaire                                                                                                                      | Only one group, lack of follow-up.                                                                                                                                                                                                              | 11   |
| McLean et al. 2013 <sup>76</sup>   | USA | Retrospective cohort  | Explore whether geographic mobility is associated with career advancement of women in U.S. medical schools who                                               | 2009      | 345 ELAM participants                                                 | ELAM database                                                                                                                                    | Unclear whether Canadian participants were accounted for.                                                                                                                                                                                       | 10.5 |



1  
2  
3  
4  
5  
6  
7  
8  
9  
10  
11  
12  
13  
14  
15  
16  
17  
18  
19  
20  
21  
22  
23  
24  
25  
26  
27  
28  
29  
30  
31  
32  
33  
34  
35  
36  
37  
38  
39  
40  
41  
42  
43  
44  
45  
46

|                                   |                |                 |                                                                                                                                                                                                                        |                    |                                                                                   |                                                                             |                                                                                                                                                                                                                                                |     |
|-----------------------------------|----------------|-----------------|------------------------------------------------------------------------------------------------------------------------------------------------------------------------------------------------------------------------|--------------------|-----------------------------------------------------------------------------------|-----------------------------------------------------------------------------|------------------------------------------------------------------------------------------------------------------------------------------------------------------------------------------------------------------------------------------------|-----|
|                                   |                |                 | are entering mid- to executive-level positions.                                                                                                                                                                        |                    |                                                                                   |                                                                             |                                                                                                                                                                                                                                                |     |
| Moghimi et al. 2019 <sup>77</sup> | USA and Canada | Cross-sectional | Compare gender representation in academic and leadership positions among faculty members in nuclear medicine in USA & Canada. Study the influences to account for the existing disparity in academic nuclear medicine. | June-December 2016 | n=249 Available faculty lists of 75 U.S. and 8 Canadian nuclear medicine programs | FREIDA, AMA, & CaRMS                                                        | <i>Lack of contextual demographic data:</i> Ethnicity, marital status, or age.<br><br><i>Lack of contextual career data:</i> dual leadership appointments or formal leadership training.                                                       | 9.5 |
| Monroe et al. 2015 <sup>78</sup>  | USA            | Cross-sectional | Delineate leadership positions in the Department of Medicine held by faculty & compare leadership positions held by male & female.                                                                                     | 2012               | 474 faculty, 181 were women.                                                      | Division websites &/or Johns Hopkins referral directory, or division heads. | <i>Lack of contextual demographic data:</i> ethnicity, or age.<br><br><i>Lack of contextual career data:</i> career stage, dual leadership appointments or formal leadership training.<br><br>Lack of definition of leadership. Response bias. | 8.5 |
| Odell et al. 2019 <sup>79</sup>   | USA & Canada   | Cross-sectional | Assess the factors contributing to gender differences in the academic ranks in academic neurosurgery                                                                                                                   | January - May 2017 | n=319 faculty in leadership ranks<br><br>89 US and 9                              | FREIDA and CaRMS                                                            | <i>Lack of contextual demographic data:</i> ethnicity, or age.<br><br><i>Lack of contextual career data:</i> career stage, dual                                                                                                                | 9.5 |

|                                      |         |                         |                                                                                                                                   |           |                                          |                                                                                                                                                   |                                                                                          |      |
|--------------------------------------|---------|-------------------------|-----------------------------------------------------------------------------------------------------------------------------------|-----------|------------------------------------------|---------------------------------------------------------------------------------------------------------------------------------------------------|------------------------------------------------------------------------------------------|------|
|                                      |         |                         | programs in<br>Canada & USA                                                                                                       |           | Canadian<br>neurosur<br>gery<br>programs |                                                                                                                                                   | leadership appointments or<br>formal leadership training.                                |      |
| Pololi et al.<br>2012 <sup>5</sup>   | USA     | Cross-<br>sectional     | Assess & compare<br>the experiences of<br>women & men<br>faculty of<br>institutional culture<br>including<br>leadership.          | 2007-2009 | 4578<br>faculty,<br>RR= 52%              | Online self-<br>reported<br>questionnaire.                                                                                                        | No methodological deficits<br>were identified.                                           | 10.5 |
| Puljak et al.<br>2008 <sup>80</sup>  | Croatia | Retrospective<br>cohort | Determine the<br>extent of women<br>advancing to<br>leadership<br>positions.                                                      | 1979-2006 | NA                                       | University of Split<br>School of<br>Medicine's<br>archives.                                                                                       | <i>Lack of contextual<br/>demographic data:</i><br>Ethnicity, marital status, or<br>age. | 9.5  |
| Reed et al.<br>2011 <sup>81</sup>    | USA     | Retrospective<br>cohort | Compare the<br>publication records,<br>academic<br>promotions, &<br>leadership<br>appointments of<br>women and men<br>physicians. | 2007      | 25<br>women<br><br>50 men                | Mayo clinic faculty<br>database (CVs).                                                                                                            | <i>Lack of contextual<br/>demographic data:</i><br>Ethnicity, marital status, or<br>age. | 9.5  |
| Rotbart et<br>al. 2012 <sup>82</sup> | USA     | Retrospective<br>cohort | Determine the<br>extent of gender<br>inequity in a<br>pediatrics<br>department<br>including<br>leadership<br>attainment & to      | 2009      | 263<br>faculty<br>members                | Department<br>databases: The<br>Faculty Information<br>Database Online<br>(FIDO), department<br>Web-based<br>software contains<br>data on faculty | No methodological deficits<br>were identified.                                           | 9.5  |

1  
2  
3  
4  
5  
6  
7  
8  
9  
10  
11  
12  
13  
14  
15  
16  
17  
18  
19  
20  
21  
22  
23  
24  
25  
26  
27  
28  
29  
30  
31  
32  
33  
34  
35  
36  
37  
38  
39  
40  
41  
42  
43  
44  
45  
46

|                                     |     |                 |                                                                                                                                                              |                |                                  |                                                           |                                                                     |   |
|-------------------------------------|-----|-----------------|--------------------------------------------------------------------------------------------------------------------------------------------------------------|----------------|----------------------------------|-----------------------------------------------------------|---------------------------------------------------------------------|---|
|                                     |     |                 | demonstrate an assessment methodology other departments can use.                                                                                             |                |                                  | members' careers, & PeopleSoft containing salary records. |                                                                     |   |
| Shah et al. 2007 <sup>83</sup>      | USA | Cross-sectional | Determine if there is any association between the gender of the chairperson/residency program director & the gender of faculty & residents in radiology.     | Dec, 2006      | 188 programs directors, RR= 45%  | Online self-reported questionnaire.                       | Does not account for women self-selecting for leadership positions. | 8 |
| Shah et al. 2010 <sup>84</sup>      | USA | Cross-sectional | Determine if there is any association between the gender of the chairperson/residency program director & the gender of faculty & residents in ophthalmology. | July, 2007     | 121 program directors, RR=45.45% | Online self-reported questionnaire.                       | Only 2 women chairpersons, not large enough to detect association.  | 8 |
| Skarupski et al. 2019 <sup>85</sup> | USA | Cross-sectional | Report participants perceptions of a leadership program in 3 areas:<br>1)program impact;<br>2)leadership preparedness; and<br>3)barriers to                  | May- July 2017 | RR =114, 40% of 8 cohorts        | Online self-reported questionnaire.                       | Low response rate.                                                  | 9 |

|                                    |                         |                       | leadership advancement                                                                                                                    |                        |                                                                              |                                                                                                                                     |                                                                                                    |     |
|------------------------------------|-------------------------|-----------------------|-------------------------------------------------------------------------------------------------------------------------------------------|------------------------|------------------------------------------------------------------------------|-------------------------------------------------------------------------------------------------------------------------------------|----------------------------------------------------------------------------------------------------|-----|
| Spalluto et al. 2017 <sup>86</sup> | USA                     | Pre/post intervention | Describe development & implementation of LIFT-OFF leadership program.                                                                     | June, 2015 – May, 2016 | 39 participants, needs assessment RR = 89.7%<br><br>Questionnaire RR = 76.9% | Self-reported questionnaire.                                                                                                        | Findings limited by lack of longitudinal data on effectiveness of intervention.                    | 10  |
| Stadler et al. 2018 <sup>87</sup>  | Singapore, Qatar, & UAE | Cross-sectional       | Describe gender differences of international clinician educators & leaders in emerging international competency-based residency programs. | June 2013-June 2014    | 359 leaders, 69 were women RR = 76.3%                                        | Program websites or through individual researchers who work for each respective institute.                                          | No methodological deficits were identified.                                                        | 10  |
| Weiss et al. 2014 <sup>54</sup>    | USA                     | Cross-sectional       | Evaluate number of women chairs, program directors, & division chiefs in surgical specialties.                                            | NA                     | 249 programs                                                                 | National Residency Matching Program for programs, AAMC report for resident & faculty, & program websites for information on chairs. | <i>Lack of contextual career data: dual leadership appointments or formal leadership training.</i> | 9.5 |

1  
2  
3  
4  
5  
6  
7  
8  
9  
10  
11  
12  
13  
14  
15  
16  
17  
18  
19  
20  
21  
22  
23  
24  
25  
26  
27  
28  
29  
30  
31  
32  
33  
34  
35  
36  
37  
38  
39  
40  
41  
42  
43  
44  
45  
46

|                                    |     |                      |                                                                                                                                                                                                                                         |           |                                    |                                                                                                           |                                                                                                                                                                                                              |      |
|------------------------------------|-----|----------------------|-----------------------------------------------------------------------------------------------------------------------------------------------------------------------------------------------------------------------------------------|-----------|------------------------------------|-----------------------------------------------------------------------------------------------------------|--------------------------------------------------------------------------------------------------------------------------------------------------------------------------------------------------------------|------|
| White et al. 2012 <sup>88</sup>    | USA | Retrospective cohort | Explore factors that may be involved in the persistent paucity of women leaders in U.S. academic medicine & to provide baseline gender-related data for developing strategies to promote gender equity in academic medicine leadership. | 1980-2006 | 534<br>Medical school deans        | AAMC faculty roster & Council of Deans database.                                                          | <i>Lack of contextual demographic data:</i> Ethnicity, marital status.                                                                                                                                       | 10.5 |
| Willett et al. 2015 <sup>89</sup>  | USA | Cross-sectional      | Determine whether salary disparities exist between women & men Internal Medicine residency program directors, & if so, to identify factors associated with the disparities.                                                             | Aug, 2012 | 370<br>program director, RR= 65.1% | Association of Program Directors in Internal Medicine for Programs, & online self-reported questionnaire. | <i>Lack of contextual demographic data:</i> Ethnicity, marital status, or age.<br><br><i>Lack of contextual career data:</i> medical specialty, dual leadership appointments, or formal leadership training. | 10.5 |
| Woodward et al. 2017 <sup>90</sup> | USA | Cross-sectional      | Determine the ratio of women occupying program directors' positions to division chiefs in gastroenterology fellowships, & to evaluate factors                                                                                           | 2015      | 163<br>gastroenterology programs   | American College of Gastroenterology, AAMC website, & program websites.                                   | <i>Lack of contextual demographic data:</i> Ethnicity, marital status, or age.<br><br><i>Lack of contextual career data:</i> career stage, dual                                                              | 9.5  |

|                                   |     |                 |                                                         |           |                      |                                                                             |                                                                                                                                                                                          |   |
|-----------------------------------|-----|-----------------|---------------------------------------------------------|-----------|----------------------|-----------------------------------------------------------------------------|------------------------------------------------------------------------------------------------------------------------------------------------------------------------------------------|---|
|                                   |     |                 | associated with this.                                   |           |                      |                                                                             | leadership appointments, or formal leadership training.                                                                                                                                  |   |
|                                   |     |                 |                                                         |           |                      |                                                                             | Does not differentiate community-based & academic programs.                                                                                                                              |   |
| Wright et al. 2003 <sup>¶</sup> § | USA | Cross-sectional | Determine reasons for gender disparities in leadership. | 1999-2000 | 418 faculty, RR= 48% | College of Medicine Personnel database, Online self-reported questionnaire. | <i>Lack of contextual demographic data:</i> Ethnicity, marital status, or age.<br><br><i>Lack of contextual career data:</i> dual leadership appointments or formal leadership training. | 7 |

Abbreviations: MERSQI, Medical Education Research Study Quality Instrument; N, Population; RR, response rate; ELAM, Executive Leadership in Academic Medicine; NA, not available.

¶ Studies that report various leadership positions within one specialty (e.g. editorship, society membership), here we report only those which are academic.

§ Studies with a study purpose beyond leadership (e.g. scholarly production).

^ reported in 2 papers Hofler et al., 2016 Hofler et al., 2015

# reported in 2 papers Dannels et al., 2008, Dannels et al., 2009, McDade et al., 2004 also reported in a 2<sup>nd</sup> paper Morahan et al., 2010

## Supplementary material 2

Quality of studies included using the MERSQI (n=39 excluding the case study)

| <b>Item (max. points)</b>                | <b>Detailed scores</b>                                          | <b>No. (%)</b> |
|------------------------------------------|-----------------------------------------------------------------|----------------|
| <b>Study design (3)</b>                  | Cross-sectional (1)                                             | 25 (64.1)      |
|                                          | Single-group pretest and posttest (1.5)                         | 4 (10.26)      |
|                                          | Non-randomized, 2 groups (including cohort studies) (2)         | 10 (25.64)     |
| <b>Sampling institutions (1.5)</b>       | 1 institution (0.5)                                             | 10 (25.64)     |
|                                          | 3 or more institutions (1.5)                                    | 29 (74.35)     |
| <b>Sampling: response rate (1.5)</b>     | NA                                                              | 21 (53.84)     |
|                                          | <50% or not reported (0.5)                                      | 9 (23.07)      |
|                                          | 50%-74% (1)                                                     | 6 (15.38)      |
|                                          | > 75% (1.5)                                                     | 3 (7.69)       |
| <b>Type of data (3)</b>                  | Assessment by study participants (1)                            | 16 (41.02)     |
|                                          | Objective (3)                                                   | 23 (58.97)     |
| <b>Validity evidence (3)</b>             | NA                                                              | 27 (69.23)     |
|                                          | Internal Structure (1)                                          | 6 (15.38)      |
|                                          | Content (1)                                                     | 8 (20.51)      |
|                                          | Relationship to other variables (1)                             | 2 (5.13)       |
| <b>Data analysis: sophistication (2)</b> | Descriptive analysis only (1)                                   | 2 (5.13)       |
|                                          | Beyond descriptive analysis (2)                                 | 37 (94.87)     |
| <b>Data analysis: appropriate (1)</b>    | Data analysis appropriate for study design and type of data (1) | 39 (100)       |
| <b>Outcome (2)</b>                       | Attitudes, perceptions, opinions, general facts (1)             | 34 (87.17)     |
|                                          | Knowledge, skills (1.5)                                         | 2 (5.13)       |
|                                          | Behaviors (2)                                                   | 3 (7.69)       |
