# Supplementary material for: Women’s leadership in academic medicine: a systematic review of extent, condition and interventions
Source: PubMed Central journal article supplement — BMJ Open. 2020 Jan 15;10(1):e032232. doi: 10.1136/bmjopen-2019-032232 (PMC7044906; doi:10.1136/bmjopen-2019-032232), 2020-01-15
Supplement: bmjopen-2019-032232supp001.pdf [file bmjopen-2019-032232supp001.pdf]

## Supplementary material 1

Characteristics of the 40 articles reviewed from earliest date available – October 2019.

| Citation                          | Country | Study Design         | Study Purpose                                                                                                                                     | Time Frame            | N +/- RR                                                           | Data Source                                                                                                                                         | Methodological limitations                                                                                                                                                                                                                                                                                                                                                                                      | MERSQI Score |
|-----------------------------------|---------|----------------------|---------------------------------------------------------------------------------------------------------------------------------------------------|-----------------------|--------------------------------------------------------------------|-----------------------------------------------------------------------------------------------------------------------------------------------------|-----------------------------------------------------------------------------------------------------------------------------------------------------------------------------------------------------------------------------------------------------------------------------------------------------------------------------------------------------------------------------------------------------------------|--------------|
| Baecher-Lind 2012 <sup>55</sup> ¶ | USA     | Retrospective cohort | Determine whether the proportion of leadership positions in OBS/GYNE held by women is consistent with the proportion of women entering residency. | July-Aug 2012         | 155 academic department chairs                                     | Department websites for name & sex of leader & state medical license databases for graduation year.                                                 | <p><i>Limited population:</i> no report on other leadership positions: vice-chairs, program directors, or unit heads.</p> <p><i>Lack of contextual demographic data:</i> ethnicity, marital status, or age.</p> <p><i>Lack of contextual career data:</i> career stage, dual leadership appointments, or formal leadership training.</p> <p>Does not differentiate community-based &amp; academic programs.</p> | 10.5         |
| Burden et al. 2015 <sup>56</sup>  | USA     | Retrospective cohort | Determine the existence of gender disparities among academic hospitalists in leadership & scholarly productivity & compare the results            | Oct, 2012 – Aug, 2014 | 69 Hospital Medicine (HM) Programs<br>80 General Internal Medicine | Graduate Medical Education Directory (AAMC listed members fully accredited by the Liaison Committee on Medical Education) for programs & department | <p>No <i>information on or adjustment for</i> size, age or geographic location of HM or GIM departments.</p> <p>It was unclear whether HM departments were divisions or sections of GIM departments.</p>                                                                                                                                                                                                        | 10.5         |

|                                     |     |                      |                                                                                                                    |              |                                                                  |                                                                                                                     |                                                                                                                                                                                                                                                          |     |
|-------------------------------------|-----|----------------------|--------------------------------------------------------------------------------------------------------------------|--------------|------------------------------------------------------------------|---------------------------------------------------------------------------------------------------------------------|----------------------------------------------------------------------------------------------------------------------------------------------------------------------------------------------------------------------------------------------------------|-----|
|                                     |     |                      | with academic general internists.                                                                                  |              | (GIM) Programs                                                   | websites for sex of leaders, & number/sex of faculty, & Program contacted through email if necessary                |                                                                                                                                                                                                                                                          |     |
| Cancian et al. 2018 <sup>57</sup> ¶ | USA | Cross-sectional      | Determine the number of women in urological leadership positions.                                                  | July 2016    | NA                                                               | Accreditation Council for Graduate Medical Education.                                                               | <i>Lack of contextual demographic data:</i> ethnicity, marital status, or age.<br><br><i>Lack of contextual career data:</i> dual leadership appointments, or formal leadership training.<br><br>Not clear which departments were academic vs community. | 8.5 |
| Carr et al. 2018 <sup>58</sup> §    | USA | Retrospective cohort | Identify predictors of advancement, retention, & leadership for women faculty from a 1995 National Faculty Survey. | 1995-2012/13 | 1995: 1801 faculty, RR = 60%<br><br>2012: 1273 faculty, RR = 48% | Mailed national faculty questionnaire conducted in 1995 & a follow-up online self-reported questionnaire in 2012-13 | No methodological deficits were identified.                                                                                                                                                                                                              | 12  |
| Cheng et al. 2006 <sup>59</sup>     | USA | Cross-sectional      | Determine if there is an association between the gender                                                            | Dec, 2004    | 133 EM programs                                                  | Society for Academic Emergency                                                                                      | Authors claim retrospective design & although trend of chairperson gender is                                                                                                                                                                             | 9.5 |

|                                    |                |                 |                                                                                                                                                                                                                |                      |                                                                       |                                                                                                      |                                                                                                                                                                                                                                                            |      |
|------------------------------------|----------------|-----------------|----------------------------------------------------------------------------------------------------------------------------------------------------------------------------------------------------------------|----------------------|-----------------------------------------------------------------------|------------------------------------------------------------------------------------------------------|------------------------------------------------------------------------------------------------------------------------------------------------------------------------------------------------------------------------------------------------------------|------|
|                                    |                |                 | of the chairperson/program director & the gender of Emergency Medicine (EM) faculty.                                                                                                                           |                      |                                                                       | Medicine online residency catalog, program websites, & program contacted through email if necessary. | reported, this does not qualify as a retrospective cohort.<br><br><i>Lack of contextual demographic data:</i> Ethnicity, marital status, or age.<br><br><i>Lack of contextual career data:</i> dual leadership appointments or formal leadership training. |      |
| Counter et al. 2019 <sup>61</sup>  | USA and Canada | Cross-sectional | Assess the evidence of gender disparities and gender differences in academic performance in pediatric radiology departments in USA & Canada                                                                    | Jan 2017 to Jan 2018 | n=279 of 170 US and 13 Canadian programs                              | FREIDA and CaRMS                                                                                     | <i>Lack of contextual demographic data:</i> Ethnicity, marital status, or age.<br><br><i>Lack of contextual career data:</i> dual leadership appointments or formal leadership training                                                                    | 9.5  |
| Dannels et al. 2009 <sup>60#</sup> | USA            | Cross-sectional | Elicit the perceptions of deans on their medical schools' organizational climate & its effect on faculty, policies affecting faculty, processes deans use for developing faculty leadership, and the impact of | May, 2006            | 142 medical school deans:<br><br>Overall RR= 58%<br><br>72 men RR=57% | AAMC for medical schools & online self-reported questionnaire.                                       | Small sample size of women deans limits detecting relevant statistical effect.<br><br><i>Lack of contextual demographic data:</i> Ethnicity, marital status, or age.<br><br><i>Lack of contextual career data:</i> dual leadership                         | 10.5 |

|                                     |     |                                            |                                                                                                                                                                                                                |             |                                                                                              |                                                                                                                                                                                                                 |                                                                                                                                                                                           |      |
|-------------------------------------|-----|--------------------------------------------|----------------------------------------------------------------------------------------------------------------------------------------------------------------------------------------------------------------|-------------|----------------------------------------------------------------------------------------------|-----------------------------------------------------------------------------------------------------------------------------------------------------------------------------------------------------------------|-------------------------------------------------------------------------------------------------------------------------------------------------------------------------------------------|------|
|                                     |     |                                            | the ELAM Program for Women.                                                                                                                                                                                    |             | 11 women<br>RR=69%                                                                           |                                                                                                                                                                                                                 | appointments or formal leadership training.                                                                                                                                               |      |
| Dannels et al. 2008 <sup>62</sup> # | USA | Pre/post intervention & prospective cohort | Determine the extent of leadership aspiration, mastery of leadership competencies, & attainment of leadership positions amongst graduates of the ELAM compared to 2 comparison groups (NON-ELAM & AAMC group). | 2002-06     | 78 ELAM graduates, RR = 73%<br><br>63 NON-ELAM group, RR= 44%<br><br>468 AAMC group, RR= 38% | Online self-reported questionnaires.                                                                                                                                                                            | No methodological deficits were identified.                                                                                                                                               | 12.5 |
| Doyle et al. 2016 <sup>63</sup>     | USA | Cross-sectional                            | Investigate the causative factors contributing to gender disparity in senior leadership positions in academic psychiatry.                                                                                      | April, 2014 | 118 (final n =109)<br><br>Overall RR = 39%<br><br>97 men chairs RR = 34%<br><br>12 women     | Publicly available data: American Association of Chairs of Departments of Psychiatry (AACDP) for psychiatry chair names, department websites for demographic information, & online self-reported questionnaire. | Problematic survey design: Assumption of prior leadership knowledge.<br><br>Objective does not align with study design: causation cannot be established in cross-sectional study designs. | 8    |

|                                    |     |                 |                                                                                                                         |                |                                                                                     |                                                                                                                                |                                                                                                                                                                             |     |
|------------------------------------|-----|-----------------|-------------------------------------------------------------------------------------------------------------------------|----------------|-------------------------------------------------------------------------------------|--------------------------------------------------------------------------------------------------------------------------------|-----------------------------------------------------------------------------------------------------------------------------------------------------------------------------|-----|
|                                    |     |                 |                                                                                                                         |                | chairs,<br>RR= 83%                                                                  |                                                                                                                                |                                                                                                                                                                             |     |
| Ellinas et al. 2018 <sup>64§</sup> | USA | Cross-sectional | Identify factors that promote medical faculty's engagement & gender difference in those factors.                        | June-Aug, 2013 | 1456 faculty members<br>RR= 42%<br><br>227 women                                    | Online self-reported questionnaire.                                                                                            | No methodological deficits were identified.                                                                                                                                 | 9   |
| Epperson et al. 2019 <sup>65</sup> | USA | Cross-sectional | Evaluates representation of women in otolaryngology holding residency and fellowship directorships, or chair positions. | 2017-18        | 99 department chairs<br><br>102 residency directors<br><br>204 fellowship directors | Publicly available data: American Medical Association's Fellowship and Residency Interactive Database.<br><br>Program websites | Lack of contextual demographic data: ethnicity, marital status, or age.<br><br>Lack of contextual career data: dual leadership appointments, or formal leadership training. | 9.5 |

|                                    |     |                       |                                                                                                                                                                |                       |                                   |                                                                                                                                                 |                                                                                                                                                                                          |     |
|------------------------------------|-----|-----------------------|----------------------------------------------------------------------------------------------------------------------------------------------------------------|-----------------------|-----------------------------------|-------------------------------------------------------------------------------------------------------------------------------------------------|------------------------------------------------------------------------------------------------------------------------------------------------------------------------------------------|-----|
| Girod et al. 2016 <sup>66</sup>    | USA | Pre/post intervention | Investigate the implicit & explicit biases favoring men as leaders & assess whether these attitudes change following an educational intervention.              | March 2012-April 2013 | 281 faculty members               | Questionnaire for general perceptions of bias, measure of explicit attitudes related to gender & leadership, & Implicit Association Test (IAT). | Findings limited by lack of longitudinal data on effectiveness of intervention.                                                                                                          | 9.5 |
| Han et al. 2017 <sup>67§</sup>     | USA | Cross-sectional       | Determine the gender & subspecialty of those holding academic departmental, administrative & educational leadership roles in urology.                          | June-Aug, 2016        | 124 urology programs              | Accreditation Council for Graduate Medical Education for programs & Urology department websites for main data. Program contacted if necessary.  | <i>Lack of contextual demographic data:</i> Ethnicity, marital status, or age.<br><br><i>Lack of contextual career data:</i> dual leadership appointments or formal leadership training. | 8.5 |
| Helitzer et al. 2014 <sup>68</sup> | USA | Cross-sectional       | Explore whether skills acquired by women in career development programs implemented by AAMC & Drexel University would vary by career stage & program attended. | Feb – April, 2011     | 2537 women participants, RR = 35% | National online self-reported questionnaire.                                                                                                    | <i>Limited population:</i> Loss of follow-up on participants who left academic medicine.                                                                                                 | 9   |

|                                    |                                     |                 |                                                                                                                                                                                                        |                       |                                              |                                                                                                                        |                                                                                                                                                                        |     |
|------------------------------------|-------------------------------------|-----------------|--------------------------------------------------------------------------------------------------------------------------------------------------------------------------------------------------------|-----------------------|----------------------------------------------|------------------------------------------------------------------------------------------------------------------------|------------------------------------------------------------------------------------------------------------------------------------------------------------------------|-----|
| Hofler et al. 2016 <sup>69^</sup>  | USA                                 | Cross-sectional | Compare the representation of women in OB/GYNE department-based leadership to leadership in other clinical specialties while accounting for the proportions of women in the residency cohorts of 1990. | Nov-2012 to Oct, 2013 | 851 eligible programs<br>105 OB/GYN programs | Accreditation Council for Graduate Medical Education 2012-13 for programs & program websites for leadership positions. | <i>Lack of contextual demographic data:</i> ethnicity, or age.<br><br>Assumption that women choose academic medicine early in their career in equal proportion to men. | 9.5 |
| Komlenac et al. 2019 <sup>70</sup> | Sweden, the Netherlands and Austria | Cross-sectional | Explore gender differences in clinical position among academic physicians at three university hospitals                                                                                                | 2012                  | 1333 participants                            | Questionnaire of the HOUPE II study                                                                                    | Low response rate<br><br>Leadership positions were limited to clinical positions; no mention of academic leadership posts                                              | 8   |
| Kuhlmann et al. 2017 <sup>71</sup> | Sweden, Germany, Austria, &UK       | Case study      | Explore & compare the representation of women in leadership and management in European academic health centers.                                                                                        | May, 2016             | 4 academic health centers                    | Unspecified                                                                                                            | No methodological deficits were identified.                                                                                                                            | NA  |
| Kværner et al. 1999 <sup>72</sup>  | Norway                              | Cross-sectional | Determine the proportion of women leaders to men leaders.                                                                                                                                              | Oct, 1997             | Overall reported 13,844 physician            | Norwegian Medical Association records.                                                                                 | No methodological deficits were identified.                                                                                                                            | 9.5 |

|                                  |     |                       |                                                                                                                                          |           |                                                                                                  |                                                                                                                                             |                                              |     |
|----------------------------------|-----|-----------------------|------------------------------------------------------------------------------------------------------------------------------------------|-----------|--------------------------------------------------------------------------------------------------|---------------------------------------------------------------------------------------------------------------------------------------------|----------------------------------------------|-----|
|                                  |     |                       |                                                                                                                                          |           | s; 3939 women.                                                                                   |                                                                                                                                             |                                              |     |
|                                  |     |                       |                                                                                                                                          |           | <i>N</i> in academic medicine 334; 94 women                                                      |                                                                                                                                             |                                              |     |
| Levine et al. 2015 <sup>73</sup> | USA | Pre/post intervention | Describe & evaluate a longitudinal cohort-based leadership program for women faculty at the Johns Hopkins University School of Medicine. | 2010-2013 | 134 women<br><br>RR cohort 2: 80%, 58%<br><br>RR cohort 3: 86%, 76%<br><br>RR cohort 4: 92%, 69% | Self-reported questionnaire.                                                                                                                | No follow up on long term effect of program. | 8.5 |
| Long et al. 2011 <sup>74</sup>   | USA | cross-sectional       | Compare the gender distribution of residency program directors with gender distribution of residents & faculty                           | NA        | 601 female program directors<br><br>75,156 Residents                                             | Educational issue of JAMA, 2010 for information on the 10 largest residency specialties.<br><br>ACGME website for number and program names. | No methodological deficits were identified.  | 9.5 |



|                                    |     |                       |                                                                                                                                                              |           |                                                                       |                                                                                                                                                  |                                                                                                                                                                                                                                                 |      |
|------------------------------------|-----|-----------------------|--------------------------------------------------------------------------------------------------------------------------------------------------------------|-----------|-----------------------------------------------------------------------|--------------------------------------------------------------------------------------------------------------------------------------------------|-------------------------------------------------------------------------------------------------------------------------------------------------------------------------------------------------------------------------------------------------|------|
|                                    |     |                       | in the 10 largest specialties.                                                                                                                               |           |                                                                       | AAMC for gender distribution of medical school faculty.                                                                                          |                                                                                                                                                                                                                                                 |      |
| Marchant et al. 2007 <sup>15</sup> | USA | Retrospective cohort  | Examine whether the presence of the word "leader" in written tenure criteria may impact the promotion of women in elite medical school differently than men. | 2004      | 24 medical schools                                                    | Carnegie Foundation classification system and the National Institutes of Health (NIH) for medical schools. School's website for tenure criteria. | Limited sample size (24/125), does not account for recruitment or departure of tenured female faculty, or the number of faculty who apply for tenure.<br><br>Wide C.I. (1.02, 35.37)<br>Uncertainty is greater with wider confidence intervals. | 11.5 |
| McDade et al. 2004 <sup>75</sup> # | USA | Pre/post intervention | Measure the impact of the ELAM program on women academicians' leadership capacities.                                                                         | 1997-2001 | 79 participants<br><br>RRs were nearly 100% (pre) & 69% to 76% (post) | Self-reported questionnaire                                                                                                                      | Only one group, lack of follow-up.                                                                                                                                                                                                              | 11   |
| McLean et al. 2013 <sup>76</sup>   | USA | Retrospective cohort  | Explore whether geographic mobility is associated with career advancement of women in U.S. medical schools who                                               | 2009      | 345 ELAM participants                                                 | ELAM database                                                                                                                                    | Unclear whether Canadian participants were accounted for.                                                                                                                                                                                       | 10.5 |

|                                   |                |                 |                                                                                                                                                                                                                        |                    |                                                                                      |                                                                             |                                                                                                                                                                                                                                                |     |
|-----------------------------------|----------------|-----------------|------------------------------------------------------------------------------------------------------------------------------------------------------------------------------------------------------------------------|--------------------|--------------------------------------------------------------------------------------|-----------------------------------------------------------------------------|------------------------------------------------------------------------------------------------------------------------------------------------------------------------------------------------------------------------------------------------|-----|
|                                   |                |                 | are entering mid- to executive-level positions.                                                                                                                                                                        |                    |                                                                                      |                                                                             |                                                                                                                                                                                                                                                |     |
| Moghimi et al. 2019 <sup>77</sup> | USA and Canada | Cross-sectional | Compare gender representation in academic and leadership positions among faculty members in nuclear medicine in USA & Canada. Study the influences to account for the existing disparity in academic nuclear medicine. | June-December 2016 | n=249<br>Available faculty lists of 75 U.S. and 8 Canadian nuclear medicine programs | FREIDA, AMA, & CaRMS                                                        | <i>Lack of contextual demographic data:</i> Ethnicity, marital status, or age.<br><br><i>Lack of contextual career data:</i> dual leadership appointments or formal leadership training.                                                       | 9.5 |
| Monroe et al. 2015 <sup>78</sup>  | USA            | Cross-sectional | Delineate leadership positions in the Department of Medicine held by faculty & compare leadership positions held by male & female.                                                                                     | 2012               | 474 faculty, 181 were women.                                                         | Division websites &/or Johns Hopkins referral directory, or division heads. | <i>Lack of contextual demographic data:</i> ethnicity, or age.<br><br><i>Lack of contextual career data:</i> career stage, dual leadership appointments or formal leadership training.<br><br>Lack of definition of leadership. Response bias. | 8.5 |
| Odell et al. 2019 <sup>79</sup>   | USA & Canada   | Cross-sectional | Assess the factors contributing to gender differences in the academic ranks in academic neurosurgery                                                                                                                   | January - May 2017 | n=319 faculty in leadership ranks<br><br>89 US and 9                                 | FREIDA and CaRMS                                                            | <i>Lack of contextual demographic data:</i> ethnicity, or age.<br><br><i>Lack of contextual career data:</i> career stage, dual                                                                                                                | 9.5 |

|                                      |         |                         | programs in<br>Canada & USA                                                                                                       |           | Canadian<br>neurosur-<br>gery<br>programs |                                                                                                                                                   | leadership appointments or<br>formal leadership training.                                |      |
|--------------------------------------|---------|-------------------------|-----------------------------------------------------------------------------------------------------------------------------------|-----------|-------------------------------------------|---------------------------------------------------------------------------------------------------------------------------------------------------|------------------------------------------------------------------------------------------|------|
| Pololi et al.<br>2012 <sup>5</sup>   | USA     | Cross-<br>sectional     | Assess & compare<br>the experiences of<br>women & men<br>faculty of<br>institutional culture<br>including<br>leadership.          | 2007-2009 | 4578<br>faculty,<br>RR= 52%               | Online self-<br>reported<br>questionnaire.                                                                                                        | No methodological deficits<br>were identified.                                           | 10.5 |
| Puljak et al.<br>2008 <sup>80</sup>  | Croatia | Retrospective<br>cohort | Determine the<br>extent of women<br>advancing to<br>leadership<br>positions.                                                      | 1979-2006 | NA                                        | University of Split<br>School of<br>Medicine's<br>archives.                                                                                       | <i>Lack of contextual<br/>demographic data:</i><br>Ethnicity, marital status, or<br>age. | 9.5  |
| Reed et al.<br>2011 <sup>81</sup>    | USA     | Retrospective<br>cohort | Compare the<br>publication records,<br>academic<br>promotions, &<br>leadership<br>appointments of<br>women and men<br>physicians. | 2007      | 25<br>women<br><br>50 men                 | Mayo clinic faculty<br>database (CVs).                                                                                                            | <i>Lack of contextual<br/>demographic data:</i><br>Ethnicity, marital status, or<br>age. | 9.5  |
| Rotbart et<br>al. 2012 <sup>82</sup> | USA     | Retrospective<br>cohort | Determine the<br>extent of gender<br>inequity in a<br>pediatrics<br>department<br>including<br>leadership<br>attainment & to      | 2009      | 263<br>faculty<br>members                 | Department<br>databases: The<br>Faculty Information<br>Database Online<br>(FIDO), department<br>Web-based<br>software contains<br>data on faculty | No methodological deficits<br>were identified.                                           | 9.5  |

|                                     |     |                 |                                                                                                                                                              |                |                                  |                                                           |                                                                     |   |
|-------------------------------------|-----|-----------------|--------------------------------------------------------------------------------------------------------------------------------------------------------------|----------------|----------------------------------|-----------------------------------------------------------|---------------------------------------------------------------------|---|
|                                     |     |                 | demonstrate an assessment methodology other departments can use.                                                                                             |                |                                  | members' careers, & PeopleSoft containing salary records. |                                                                     |   |
| Shah et al. 2007 <sup>83</sup>      | USA | Cross-sectional | Determine if there is any association between the gender of the chairperson/residency program director & the gender of faculty & residents in radiology.     | Dec, 2006      | 188 programs directors, RR= 45%  | Online self-reported questionnaire.                       | Does not account for women self-selecting for leadership positions. | 8 |
| Shah et al. 2010 <sup>84</sup>      | USA | Cross-sectional | Determine if there is any association between the gender of the chairperson/residency program director & the gender of faculty & residents in ophthalmology. | July, 2007     | 121 program directors, RR=45.45% | Online self-reported questionnaire.                       | Only 2 women chairpersons, not large enough to detect association.  | 8 |
| Skarupski et al. 2019 <sup>85</sup> | USA | Cross-sectional | Report participants perceptions of a leadership program in 3 areas: 1)program impact; 2)leadership preparedness; and 3)barriers to                           | May- July 2017 | RR =114, 40% of 8 cohorts        | Online self-reported questionnaire.                       | Low response rate.                                                  | 9 |

| leadership advancement             |                         |                       |                                                                                                                                           |                        |                                                                              |                                                                                                                                     |                                                                                                    |     |
|------------------------------------|-------------------------|-----------------------|-------------------------------------------------------------------------------------------------------------------------------------------|------------------------|------------------------------------------------------------------------------|-------------------------------------------------------------------------------------------------------------------------------------|----------------------------------------------------------------------------------------------------|-----|
| Spalluto et al. 2017 <sup>86</sup> | USA                     | Pre/post intervention | Describe development & implementation of LIFT-OFF leadership program.                                                                     | June, 2015 – May, 2016 | 39 participants, needs assessment RR = 89.7%<br><br>Questionnaire RR = 76.9% | Self-reported questionnaire.                                                                                                        | Findings limited by lack of longitudinal data on effectiveness of intervention.                    | 10  |
| Stadler et al. 2018 <sup>87</sup>  | Singapore, Qatar, & UAE | Cross-sectional       | Describe gender differences of international clinician educators & leaders in emerging international competency-based residency programs. | June 2013-June 2014    | 359 leaders, 69 were women RR = 76.3%                                        | Program websites or through individual researchers who work for each respective institute.                                          | No methodological deficits were identified.                                                        | 10  |
| Weiss et al. 2014 <sup>54</sup>    | USA                     | Cross-sectional       | Evaluate number of women chairs, program directors, & division chiefs in surgical specialties.                                            | NA                     | 249 programs                                                                 | National Residency Matching Program for programs, AAMC report for resident & faculty, & program websites for information on chairs. | <i>Lack of contextual career data:</i> dual leadership appointments or formal leadership training. | 9.5 |

|                                    |     |                      |                                                                                                                                                                                                                                         |           |                                    |                                                                                                           |                                                                                                                                                                                                              |      |
|------------------------------------|-----|----------------------|-----------------------------------------------------------------------------------------------------------------------------------------------------------------------------------------------------------------------------------------|-----------|------------------------------------|-----------------------------------------------------------------------------------------------------------|--------------------------------------------------------------------------------------------------------------------------------------------------------------------------------------------------------------|------|
| White et al. 2012 <sup>88</sup>    | USA | Retrospective cohort | Explore factors that may be involved in the persistent paucity of women leaders in U.S. academic medicine & to provide baseline gender-related data for developing strategies to promote gender equity in academic medicine leadership. | 1980-2006 | 534<br>Medical school deans        | AAMC faculty roster & Council of Deans database.                                                          | <i>Lack of contextual demographic data:</i> Ethnicity, marital status.                                                                                                                                       | 10.5 |
| Willett et al. 2015 <sup>89</sup>  | USA | Cross-sectional      | Determine whether salary disparities exist between women & men Internal Medicine residency program directors, & if so, to identify factors associated with the disparities.                                                             | Aug, 2012 | 370<br>program director, RR= 65.1% | Association of Program Directors in Internal Medicine for Programs, & online self-reported questionnaire. | <i>Lack of contextual demographic data:</i> Ethnicity, marital status, or age.<br><br><i>Lack of contextual career data:</i> medical specialty, dual leadership appointments, or formal leadership training. | 10.5 |
| Woodward et al. 2017 <sup>90</sup> | USA | Cross-sectional      | Determine the ratio of women occupying program directors' positions to division chiefs in gastroenterology fellowships, & to evaluate factors                                                                                           | 2015      | 163<br>gastroenterology programs   | American College of Gastroenterology, AAMC website, & program websites.                                   | <i>Lack of contextual demographic data:</i> Ethnicity, marital status, or age.<br><br><i>Lack of contextual career data:</i> career stage, dual                                                              | 9.5  |

|                                   |     |                 |                                                         |           |                      |                                                                             |                                                                                                                                                                                          |   |
|-----------------------------------|-----|-----------------|---------------------------------------------------------|-----------|----------------------|-----------------------------------------------------------------------------|------------------------------------------------------------------------------------------------------------------------------------------------------------------------------------------|---|
|                                   |     |                 | associated with this.                                   |           |                      |                                                                             | leadership appointments, or formal leadership training.                                                                                                                                  |   |
|                                   |     |                 |                                                         |           |                      |                                                                             | Does not differentiate community-based & academic programs.                                                                                                                              |   |
| Wright et al. 2003 <sup>¶</sup> § | USA | Cross-sectional | Determine reasons for gender disparities in leadership. | 1999-2000 | 418 faculty, RR= 48% | College of Medicine Personnel database, Online self-reported questionnaire. | <i>Lack of contextual demographic data:</i> Ethnicity, marital status, or age.<br><br><i>Lack of contextual career data:</i> dual leadership appointments or formal leadership training. | 7 |

Abbreviations: MERSQI, Medical Education Research Study Quality Instrument; N, Population; RR, response rate; ELAM, Executive Leadership in Academic Medicine; NA, not available.

¶ Studies that report various leadership positions within one specialty (e.g. editorship, society membership), here we report only those which are academic.

§ Studies with a study purpose beyond leadership (e.g. scholarly production).

^ reported in 2 papers Hofler et al., 2016 Hofler et al., 2015

# reported in 2 papers Dannels et al., 2008, Dannels et al., 2009, McDade et al., 2004 also reported in a 2<sup>nd</sup> paper Morahan et al., 2010
