# Supplementary material for: Women’s leadership in academic medicine: a systematic review of extent, condition and interventions
Source: PubMed Central journal article supplement — BMJ Open. 2020 Jan 15;10(1):e032232. doi: 10.1136/bmjopen-2019-032232 (PMC7044906; doi:10.1136/bmjopen-2019-032232), 2020-01-15
Supplement: bmjopen-2019-032232supp002.pdf [file bmjopen-2019-032232supp002.pdf]

**Supplementary material 2**

Quality of studies included using the MERSQI (n=39 excluding the case study)

| <b>Item (max. points)</b>                | <b>Detailed scores</b>                                          | <b>No. (%)</b> |
|------------------------------------------|-----------------------------------------------------------------|----------------|
| <b>Study design (3)</b>                  | Cross-sectional (1)                                             | 25 (64.1)      |
|                                          | Single-group pretest and posttest (1.5)                         | 4 (10.26)      |
|                                          | Non-randomized, 2 groups (including cohort studies) (2)         | 10 (25.64)     |
| <b>Sampling institutions (1.5)</b>       | 1 institution (0.5)                                             | 10 (25.64)     |
|                                          | 3 or more institutions (1.5)                                    | 29 (74.35)     |
| <b>Sampling: response rate (1.5)</b>     | NA                                                              | 21 (53.84)     |
|                                          | <50% or not reported (0.5)                                      | 9 (23.07)      |
|                                          | 50%-74% (1)                                                     | 6 (15.38)      |
|                                          | > 75% (1.5)                                                     | 3 (7.69)       |
| <b>Type of data (3)</b>                  | Assessment by study participants (1)                            | 16 (41.02)     |
|                                          | Objective (3)                                                   | 23 (58.97)     |
| <b>Validity evidence (3)</b>             | NA                                                              | 27 (69.23)     |
|                                          | Internal Structure (1)                                          | 6 (15.38)      |
|                                          | Content (1)                                                     | 8 (20.51)      |
|                                          | Relationship to other variables (1)                             | 2 (5.13)       |
| <b>Data analysis: sophistication (2)</b> | Descriptive analysis only (1)                                   | 2 (5.13)       |
|                                          | Beyond descriptive analysis (2)                                 | 37 (94.87)     |
| <b>Data analysis: appropriate (1)</b>    | Data analysis appropriate for study design and type of data (1) | 39 (100)       |
| <b>Outcome (2)</b>                       | Attitudes, perceptions, opinions, general facts (1)             | 34 (87.17)     |
|                                          | Knowledge, skills (1.5)                                         | 2 (5.13)       |
|                                          | Behaviors (2)                                                   | 3 (7.69)       |
